# Supplementary material for: Single-ion magnet behaviour in highly axial lanthanide mononitrides encapsulated in boron nitride nanotubes: a quantum chemical investigation
Source: Royal Society of Chemistry journal article supplement (doi:10.1039/d4dt03311f), 2025-01-01
Supplement: d4dt03311f1.pdf [file d4dt03311f1.pdf]

## SUPPORTING INFORMATION

# Single-ion magnet behaviour in highly axial lanthanide mononitrides encapsulated in boron nitride nanotubes: a quantum chemical investigation

Kusum Kumari, Shruti Moorthy and Saurabh Kumar Singh\*

---

K. Kumari, S. Moorthy, Dr. S. K. Singh  
*Computational Inorganic Chemistry Group,  
Department of Chemistry,  
Indian Institute of Technology Hyderabad,  
Kandi, Sangareddy, Telangana-502284, India  
E-mail: [sksingh@chy.iith.ac.in](mailto:sksingh@chy.iith.ac.in)*

## SUPPORTING INFORMATION

|                                                                                                                                                                                                                                                                                                                                                                                                                                                                                                                                |    |
|--------------------------------------------------------------------------------------------------------------------------------------------------------------------------------------------------------------------------------------------------------------------------------------------------------------------------------------------------------------------------------------------------------------------------------------------------------------------------------------------------------------------------------|----|
| Contents .....                                                                                                                                                                                                                                                                                                                                                                                                                                                                                                                 | 5  |
| <b>Fig. S1</b> B3LYP computed IR-frequencies along with the optimized bond lengths (inset).....                                                                                                                                                                                                                                                                                                                                                                                                                                | 5  |
| <b>Fig. S2</b> Schematic representation of parallel( $\parallel$ ) and perpendicular( $\perp$ ) arrangement of [LnN] inside BNNT. The tube is periodic along the z-direction.....                                                                                                                                                                                                                                                                                                                                              | 5  |
| <b>Table S1</b> The diameters ( $\text{\AA}$ ) of non-optimized, optimized pristine, and fully optimized DyN@BNNT.....                                                                                                                                                                                                                                                                                                                                                                                                         | 5  |
| <b>Fig. S3</b> pDFT optimized structures of a) <b>8Tb<math>\parallel</math></b> ; b) <b>8Tb<math>\perp</math></b> ; c) <b>9Tb<math>\parallel</math></b> and d) <b>9Tb<math>\perp</math></b> with relevant bond parameters (bond distance in red color represents the Tb-N bond distance of the [TbN] molecule; (e)-(h) CDD plots corresponding to optimized structures plotted with an isosurface= 0.00186 e $\text{\AA}^{-3}$ ; (i)-(l) NCI-plots for above structures. Color code: Tb (light-green), N(blue), B(pink). ..... | 6  |
| <b>Table S2</b> pDFT computed binding energies of [LnN]@BNNT assemblies. ....                                                                                                                                                                                                                                                                                                                                                                                                                                                  | 6  |
| <b>Fig. S4</b> PBE-D3BJ/TZ2P computed trends in the total interaction energy a), with the corresponding %contribution b) for [LnN]@BNNTs. ....                                                                                                                                                                                                                                                                                                                                                                                 | 7  |
| <b>Table S3</b> PBE-D3BJ/TZ2P computed PEDAs energies for [LnN]@BNNT. All energies are in kJ/mol.....                                                                                                                                                                                                                                                                                                                                                                                                                          | 7  |
| <b>Table S4</b> Contribution (%) of decomposition energies to Total Binding Energy for complexes.....                                                                                                                                                                                                                                                                                                                                                                                                                          | 7  |
| <b>Table S5</b> PBE-D3BJ/TZ2P computed HOMO, LUMO, and spin densities of [LnN]@BNNT.....                                                                                                                                                                                                                                                                                                                                                                                                                                       | 8  |
| <b>Periodic Energy Decomposition Analysis:</b> .....                                                                                                                                                                                                                                                                                                                                                                                                                                                                           | 9  |
| <b>Table S6</b> ETS-NOCV derived the first three strongest electron deformation densities ( $\Delta E_{\text{orb}(1)}$ to $\Delta E_{\text{orb}(3)}$ ) at the PBE-D3(BJ)/TZ2P level. Isosurface values are 0.0001 a.u. The direction of the charge flow of the deformation densities is from red to blue. The $\Delta E_{\text{orb}}$ energies are in kJ/mol. The eigenvalues $v_i$ give the size of the charge migration. ....                                                                                                | 12 |
| .....                                                                                                                                                                                                                                                                                                                                                                                                                                                                                                                          | 14 |
| <b>Fig. S5</b> ETS-NOCV computed electron deformation density (EDD) plots along with corresponding donor and acceptor for <b>9Dy<math>\parallel</math></b> and <b>9Dy<math>\perp</math></b> computed at PBE-D3BJ/TZ2P level of theory. The EDD is plotted with an isosurface value of                                                                                                                                                                                                                                          |    |

## SUPPORTING INFORMATION

|                                                                                                                                                                                                                                          |    |
|------------------------------------------------------------------------------------------------------------------------------------------------------------------------------------------------------------------------------------------|----|
| 0.00001 a.u., where the violet region shows charge depletion and the green region shows charge accumulation.....                                                                                                                         | 14 |
| <b>Fig. S6</b> Density of States plot for <b>8Dy<sub>  </sub></b> . The green dotted line shows the fermi-level. ....                                                                                                                    | 14 |
| <b>Fig. S7</b> Density of States plot for <b>8Dy<sub>⊥</sub></b> .The green dotted line shows the fermi-level. ....                                                                                                                      | 15 |
| <b>Fig. S8</b> Density of States plot for <b>9Dy<sub>  </sub></b> .The green dotted line shows the fermi-level. ....                                                                                                                     | 15 |
| <b>Table S7</b> Basis set specification of several atoms in OpenMolcas.....                                                                                                                                                              | 16 |
| <b>Fig. S9</b> CASSCF computed g-tensor orientation in <b>8Dy<sub>  </sub></b> and <b>8Dy<sub>⊥</sub></b> . The solid arrow denotes the main magnetic anisotropy axis ( $g_{zz}$ ). Color code: Dy (green), N(blue), B(pink). ....       | 17 |
| <b>Fig. S10</b> CASSCF computed g-tensor orientation in <b>8Tb<sub>  </sub></b> and <b>8Tb<sub>⊥</sub></b> . The solid arrow denotes the main magnetic anisotropy axis ( $g_{zz}$ ). Color code: Tb (light-green), N(blue), B(pink)..... | 17 |
| <b>Fig. S11</b> CASSCF computed g-tensor orientation in <b>9Tb<sub>  </sub></b> and <b>9Tb<sub>⊥</sub></b> . The solid arrow denotes the main magnetic anisotropy axis ( $g_{zz}$ ). Color code: Tb (light-green), N(blue), B(pink)..... | 18 |
| <b>Fig. S12</b> CASSCF computed LoProp charges on the nearest boron and nitrogen atoms of the [DyN] molecule. Color code: Dy (green), N(blue), B(pink). ....                                                                             | 18 |
| <b>Table S8</b> SINGLE_ANISO computed span of the eight low-lying KDs for complexes [DyN]@BNNT reported in $\text{cm}^{-1}$ . ....                                                                                                       | 18 |
| <b>Table S9</b> CASSCF computed SOC states and corresponding g-tensor values [DyN] and [TbN] molecules and encapsulated [LnN]@BNNT. All the energies are reported in $\text{cm}^{-1}$ .....                                              | 19 |
| <b>Table S10</b> SINGLE_ANISO computed wave function decomposition analysis for the DyN@BNNT centre.....                                                                                                                                 | 20 |
| <b>Table S11</b> SINGLE_ANISO computed wave function decomposition analysis for the TbN@BNNT centre.....                                                                                                                                 | 20 |
| <b>Table S12</b> SINGLE_ANISO computed crystal field parameters for [DyN]@BNNT. The CF parameters were computed using the following equation,                                                                                            |    |

## SUPPORTING INFORMATION

$\hat{H}_{CF} = \sum_{k=-q}^q B_k^q O_k^q$  and here  $B_k^q$  and  $O_k^q$  are the crystal field parameters and Steven's operator, respectively. ....21

**Table S13** SINGLE\_ANISO computed crystal field parameters for [TbN]@BNNT. The CF parameters were computed using the following equation, and here  $B_k^q$  and  $O_k^q$  are the crystal field parameters and Steven's operator, respectively. ....22

**Table S14** pDFT optimized coordinates of LnN@BNNT.....23

**Reference**.....36

## SUPPORTING INFORMATION

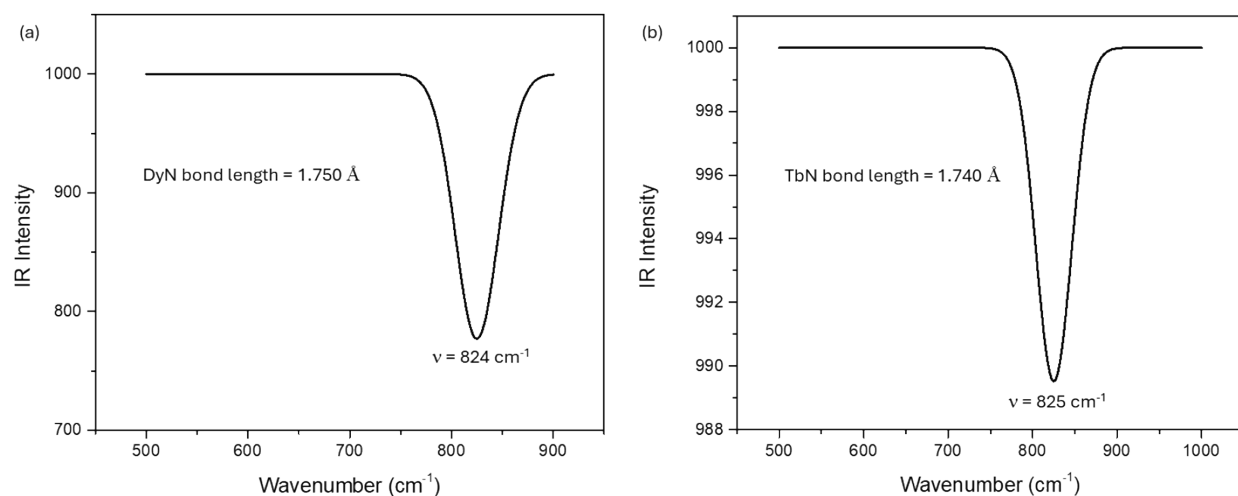

**Fig. S1** B3LYP computed IR-frequencies along with the optimized bond lengths (inset).

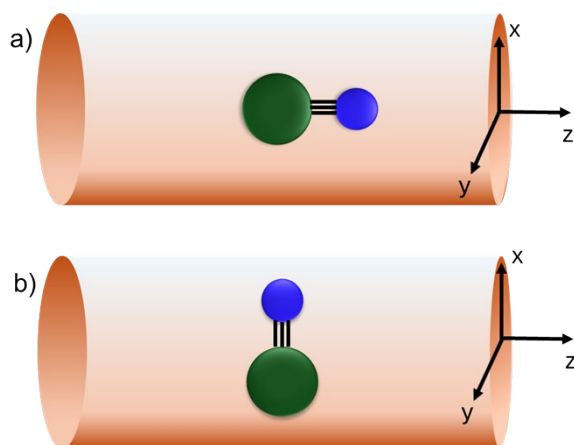

**Fig. S2** Schematic representation of parallel( $\parallel$ ) and perpendicular( $\perp$ ) arrangement of [LnN] inside BNNT. The tube is periodic along the z-direction.

**Table S1** The diameters ( $\text{\AA}$ ) of non-optimized, optimized pristine, and fully optimized DyN@BNNT.

|                                           | (8,0)                            |                              | (9,0)                            |                              |
|-------------------------------------------|----------------------------------|------------------------------|----------------------------------|------------------------------|
| <b>Pristine-non optimised<sup>1</sup></b> | 6.73                             |                              | 7.33                             |                              |
| <b>Pristine optimised</b>                 | 6.77                             |                              | 7.34                             |                              |
| <b>DyN@BNNT</b>                           | <b>8Dy<math>\parallel</math></b> | <b>8Dy<math>\perp</math></b> | <b>9Dy<math>\parallel</math></b> | <b>9Dy<math>\perp</math></b> |
|                                           | 6.79 $\text{\AA}$                | 6.71 $\text{\AA}$            | 7.33 $\text{\AA}$                | 7.36 $\text{\AA}$            |

## SUPPORTING INFORMATION

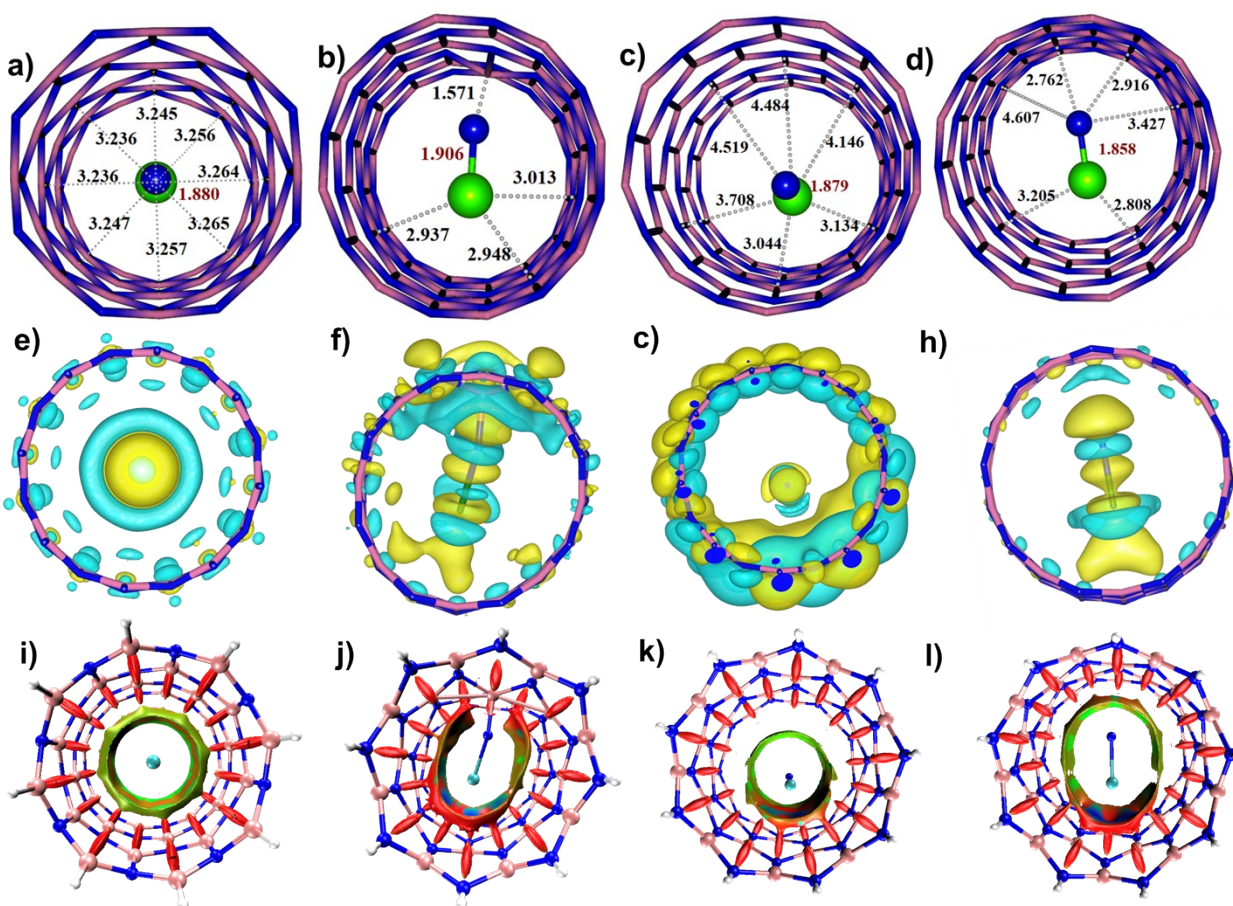

**Fig. S3** pDFT optimized structures of a)  $8\text{Tb}_{\parallel}$ ; b)  $8\text{Tb}_{\perp}$ ; c)  $9\text{Tb}_{\parallel}$  and d)  $9\text{Tb}_{\perp}$  with relevant bond parameters (bond distance in red color represents the Tb-N bond distance of the [TbN] molecule; (e)-(h) CDD plots corresponding to optimized structures plotted with an isosurface = 0.00186 e Å<sup>-3</sup>; (i)-(l) NCI-plots for above structures. Color code: Tb (light-green), N (blue), B (pink).

**Table S2** pDFT computed binding energies of [LnN]@BNNT assemblies.

| $\text{LnN@BNNT}(n,0)$ | $\text{Ln}_{\parallel}$ | $\text{Ln}_{\perp}$ |
|------------------------|-------------------------|---------------------|
| $\text{DyN@BNNT}(8,0)$ | -217.75                 | -175.97             |
| $\text{DyN@BNNT}(9,0)$ | -183.95                 | -130.32             |
| $\text{TbN@BNNT}(8,0)$ | -214.19                 | -166.97             |
| $\text{TbN@BNNT}(9,0)$ | -180.16                 | -128.52             |

$$\text{B.E.} = E_{\text{LnN@BNNT}} - E_{\text{LnN}} - E_{\text{BNNT}}$$

## SUPPORTING INFORMATION

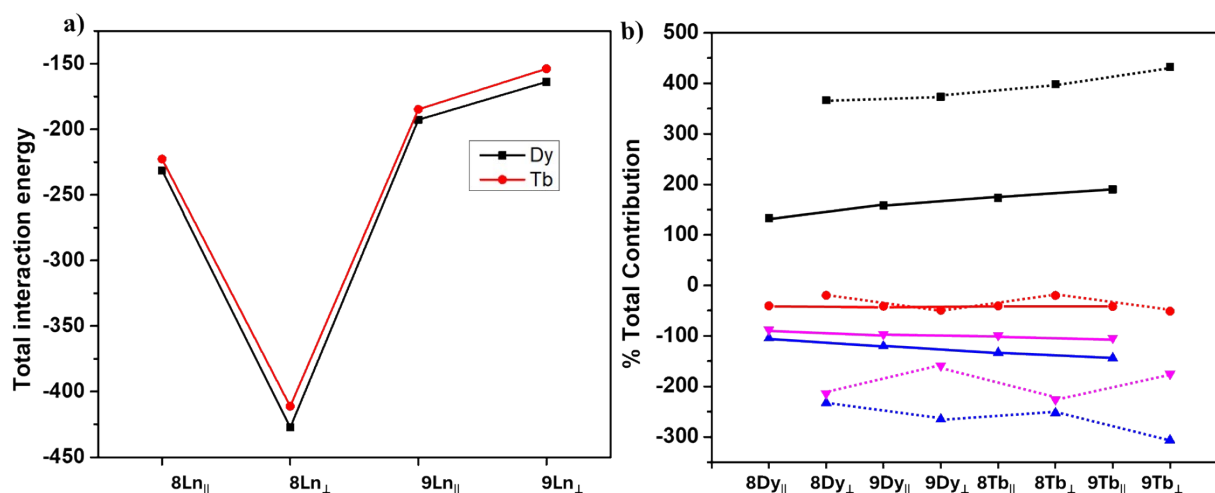

**Fig. S4** PBE-D3BJ/TZ2P computed trends in the total interaction energy a), with the corresponding %contribution b) for [LnN]@BNNTs.

**Table S3** PBE-D3BJ/TZ2P computed PEDAs energies for [LnN]@BNNT. All energies are in kJ/mol.

| Energy                   | 8Dy               |                  | 8Tb               |                  | 9Dy               |                  | 9Tb               |                  |
|--------------------------|-------------------|------------------|-------------------|------------------|-------------------|------------------|-------------------|------------------|
|                          | 8Dy <sub>  </sub> | 8Dy <sub>⊥</sub> | 8Tb <sub>  </sub> | 8Tb <sub>⊥</sub> | 9Dy <sub>  </sub> | 9Dy <sub>⊥</sub> | 9Tb <sub>  </sub> | 9Tb <sub>⊥</sub> |
| Assemblies               |                   |                  |                   |                  |                   |                  |                   |                  |
| Pauli                    | 307.8             | 1565.7           | 385.6             | 1638.9           | 305.3             | 631.5            | 351.1             | 665.5            |
| Dispersion               | -93.7             | -84.5            | -90.6             | -81.8            | -79.4             | -80.5            | -77.3             | -78.4            |
| Electrostatic            | -242.2            | -993.3           | -297.1            | -1038.3          | -232.2            | -446.2           | -266.1            | -471.1           |
| Orbital                  | -203.2            | -915.2           | -220.5            | -929.9           | -186.4            | -266.2           | -192.5            | -269.8           |
| <b>Total Interaction</b> | <b>-231.4</b>     | <b>-427.3</b>    | <b>-222.7</b>     | <b>-411.2</b>    | <b>-192.7</b>     | <b>-161.4</b>    | <b>-184.8</b>     | <b>-153.8</b>    |

**Table S4** Contribution (%) of decomposition energies to Total Binding Energy for complexes.

| Assemblies        | E Pauli | E disp | E elstat | E orb  |
|-------------------|---------|--------|----------|--------|
| 8Dy <sub>  </sub> | 133.0   | -40.5  | -104.7   | -87.8  |
| 8Dy <sub>⊥</sub>  | 366.4   | -19.8  | -232.5   | -214.2 |
| 9Dy <sub>  </sub> | 158.4   | -41.2  | -120.5   | -96.7  |
| 9Dy <sub>⊥</sub>  | 373.4   | -49.5  | -264.9   | -159.0 |
| 8Tb <sub>  </sub> | 173.1   | -40.7  | -133.4   | -99.0  |
| 8Tb <sub>⊥</sub>  | 398.6   | -19.9  | -252.5   | -226.1 |
| 9Tb <sub>  </sub> | 190.0   | -41.8  | -144.0   | -104.2 |
| 9Tb <sub>⊥</sub>  | 432.7   | -51.0  | -306.3   | -175.4 |

## SUPPORTING INFORMATION

Table S5 PBE-D3BJ/TZ2P computed HOMO, LUMO, and spin densities of [LnN]@BNNT.

| Complex           | HOMO                                                                                | LUMO                                                                                 | Spin-density                                                                          |
|-------------------|-------------------------------------------------------------------------------------|--------------------------------------------------------------------------------------|---------------------------------------------------------------------------------------|
| 8Dy <sub>  </sub> | 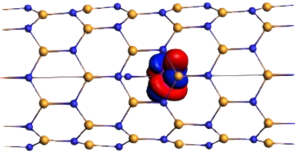   |    |    |
| 8Dy <sub>⊥</sub>  |    |     |    |
| 8Tb <sub>  </sub> |    |    |    |
| 8Tb <sub>⊥</sub>  |  |   |  |
| 9Dy <sub>  </sub> |  |  |  |
| 9Dy <sub>⊥</sub>  |  |   |  |



## SUPPORTING INFORMATION

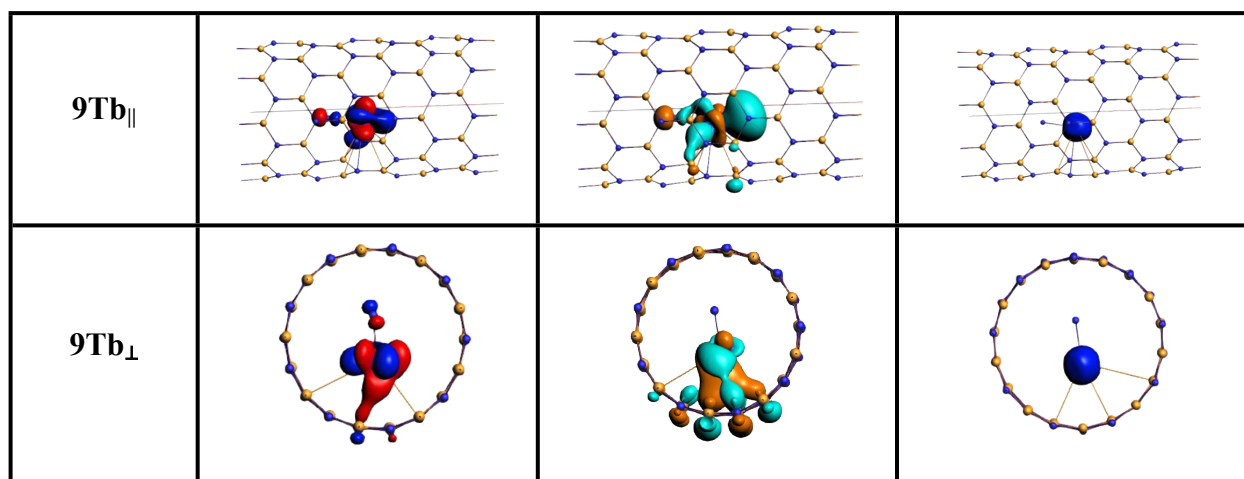

### Periodic Energy Decomposition Analysis:

The total interaction energy  $\Delta E_{\text{int}}$  is broken down into four components within the ETS energy breakdown scheme<sup>2</sup> as shown in equation 2;

$$\Delta E_{\text{int}} = \Delta E_{\text{elstat}} + \Delta E_{\text{Pauli}} + \Delta E_{\text{orb}} + \Delta E_{\text{disp}} \quad \dots (2)$$

$\Delta E_{\text{elstat}}$  represents the classical electrostatic interaction between the charge densities of the fragments within the promolecule, directly correlating with the ionic bonding between the fragments. On the other hand,  $\Delta E_{\text{Pauli}}$  accounts for Pauli repulsion, reflecting the energy increase due to enforcing the Pauli exclusion principle on the promolecular densities, which are intrinsically repulsive.  $\Delta E_{\text{disp}}$  includes the DFT-D3 dispersion correction<sup>3</sup> contribution, which is always stabilizing in nature.  $\Delta E_{\text{orb}}$  represents the orbital interaction term, reflecting the reduction in energy as promolecular densities mix and relax, linked to the covalent bonding between metal and ligands. It describes the stabilization due to the relaxation of fragment wavefunctions ( $\Psi^0$ ) into the combined wavefunction ( $\Psi$ ) during bonding. Using NOCV within EDA,  $\Delta E_{\text{orb}}$  is broken into contributions from interacting orbitals. Pairs of complementary orbitals ( $\Psi_{-k}$ ,  $\Psi_k$ ) with non-zero eigenvalues represent the deformation density ( $\Delta\rho_{\text{orb}}$ ), showing electron density redistribution.

## SUPPORTING INFORMATION

Non-interacting orbitals have zero eigenvalues and contribute no deformation, as shown in equation 3.

$$\Delta\rho^{orb}(r) = \rho - \rho^o = \sum_{k=1}^{\frac{N}{2}} v_k [-\Psi_{-k}^2(r) + \psi_k^2(r)] + \sum_{k=1}^{N/2} \Delta\rho_k(r) \quad \dots (3)$$

This includes contributions from charge transfer, electron pair bonding, and polarization. This systematic breakdown into physical components offers insights into bonding, especially in systems with distinct  $\sigma$  and  $\pi$  characters, showing how electron density redistributes and stabilizes the interaction.

We performed PEDA calculations to decompose further the nature of interactions between the **[LnN]** and BNNT rings. The computed interaction energy ( $\Delta E_{int}$ ) is always stabilizing in nature for all eight hybrid assemblies. The computed  $\Delta E_{int}$  value is significant for the **[LnN]@BNNT (8,0)** compared to **[LnN]@BNNT (9,0)**, which aligns with the observed trend in the binding energy. Among all the studied eight assemblies, the Pauli interactions are the strongest, followed by the electrostatic and orbital interactions, which are stabilizing in nature. As we move from the **8Dy<sub>||</sub>(8Tb<sub>||</sub>)** to **9Dy<sub>||</sub>(9Tb<sub>||</sub>)** complexes, both the electrostatic and orbital interaction decreases due to an increase in the diameter of the tube, resulting in a weaker  $\Delta E_{int}$  value for the **[LnN]@BNNT (9,0)** assemblies. For **8Dy<sub>⊥</sub>** and **8Tb<sub>⊥</sub>** assemblies, we observed giant  $\Delta E_{int}$  values of -427.3 kJ/mol and -411.2 kJ/mole, nearly two times larger than any other computed  $\Delta E_{int}$  values. This exceptionally high  $\Delta E_{int}$  value in **8Dy<sub>⊥</sub>** and **8Tb<sub>⊥</sub>** is attributed to the formation of the B-N bond between the B atom of the BNNT ring and the N atom of **[LnN]**. Next, we decomposed the orbital component of the interaction energy ( $\Delta E_{orb}$ ) into its corresponding NOCV donor/acceptor pairs to

## SUPPORTING INFORMATION

understand the nature of the interaction. Table S6 summarizes the first three deformation densities with the corresponding energy value. Notably, we observed the strong *s*-type orbital interaction with  $\Delta E_{\text{orb1}}$  value of -261.7(-248.5) kJ/mol for the **8Dy<sub>⊥</sub>(8Tb<sub>⊥</sub>)**, which is ~29(27)% of the total  $\Delta E_{\text{orb}}$  value. Visual inspection of the NOCV pair reveals an electron flow from the **[LnN]** orbital to the vacant *2p* orbital of the B atoms in the BNNT ring. For **9Dy<sub>⊥</sub>(9Tb<sub>⊥</sub>)**, we observed a similar NOCV pair corresponding to the  $\Delta E_{\text{orb1}}$  value; however, the strength of the  $\Delta E_{\text{orb1}}$  value is decreased to -63.1(-47.0) kJ/mol as a result of the decreased orbital overlap in the BNNT (9,0) tube (see Fig. S5). Contrarily, the  $\Delta E_{\text{orb1}}$  value for the **8Dy<sub>∥</sub>(8Tb<sub>∥</sub>)** and **9Dy<sub>∥</sub>(9Tb<sub>∥</sub>)** assemblies is extremely weak, indicating a weaker orbital overlap interaction between the **[LnN]** and BNNT rings in the parallel arrangement. The computed deformation density from the PEDDA calculation nicely matches the computed CDD plots (see Fig. 2, S2 and S5). The dispersion interaction is always stabilizing in nature and contributes around ~19% to 50% of the total interaction energy. The strength of the dispersion interaction is more dominant in the **8Dy<sub>∥</sub>(8Tb<sub>∥</sub>)** and **9Dy<sub>∥</sub>(9Tb<sub>∥</sub>)** assemblies. The presence of the dispersion interaction can be directly verified from the NCI plots, which show weak van der Waals interaction between the tube and **[LnN]** molecule.

## SUPPORTING INFORMATION

**Table S6** ETS-NOCV derived the first three strongest electron deformation densities ( $\Delta E_{\text{orb}(1)}$  to  $\Delta E_{\text{orb}(3)}$ ) at the PBE-D3(BJ)/TZ2P level. Isosurface values are 0.0001 a.u. The direction of the charge flow of the deformation densities is from red to blue. The  $\Delta E_{\text{orb}}$  energies are in kJ/mol. The eigenvalues  $v_i$  give the size of the charge migration.

| Complex                 | $\Delta E_{\text{orb}(1)}$                                                                                                                                        | $\Delta E_{\text{orb}(2)}$                                                                                                                                        | $\Delta E_{\text{orb}(3)}$                                                                                                                                         |
|-------------------------|-------------------------------------------------------------------------------------------------------------------------------------------------------------------|-------------------------------------------------------------------------------------------------------------------------------------------------------------------|--------------------------------------------------------------------------------------------------------------------------------------------------------------------|
| <b>8Dy<sub>  </sub></b> | 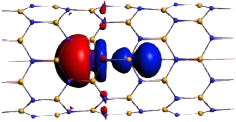<br>$\Delta r_{(1)}$<br>$\Delta E_{\text{orb}(1)} = -11.8;$<br>$ n_1  = 0.25$    | <br>$\Delta r_{(2)}$<br>$\Delta E_{\text{orb}(2)} = -14.5;$<br>$ n_2  = 0.17$   | <br>$\Delta r_{(3)}$<br>$\Delta E_{\text{orb}(3)} = -14.4;$<br>$ n_3  = 0.17$   |
| <b>8Dy<sub>⊥</sub></b>  | <br>$\Delta r_{(1)}$<br>$\Delta E_{\text{orb}(1)} = -261.7;$<br>$ n_1  = 0.53$   | <br>$\Delta r_{(2)}$<br>$\Delta E_{\text{orb}(2)} = -39.9$<br>$ n_2  = 0.23$    | <br>$\Delta r_{(3)}$<br>$\Delta E_{\text{orb}(3)} = -29.7;$<br>$ n_3  = 0.19$   |
| <b>8Tb<sub>  </sub></b> | <br>$\Delta r_{(1)}$<br>$\Delta E_{\text{orb}(1)} = -15.0;$<br>$ n_1  = 0.17$  | <br>$\Delta r_{(2)}$<br>$\Delta E_{\text{orb}(2)} = -15.0;$<br>$ n_2  = 0.17$ | <br>$\Delta r_{(3)}$<br>$\Delta E_{\text{orb}(3)} = -9.3;$<br>$ n_3  = 0.15$  |
| <b>8Tb<sub>⊥</sub></b>  | <br>$\Delta r_{(1)}$<br>$\Delta E_{\text{orb}(1)} = -248.5;$<br>$ n_1  = 0.46$ | <br>$\Delta r_{(2)}$<br>$\Delta E_{\text{orb}(2)} = -29.9;$<br>$ n_2  = 0.21$ | <br>$\Delta r_{(3)}$<br>$\Delta E_{\text{orb}(3)} = -31.4;$<br>$ n_3  = 0.19$ |
| <b>9Dy<sub>  </sub></b> |                                                                                |                                                                               | <br>$\Delta r_{(3)}$                                                          |

# SUPPORTING INFORMATION

|                        |                                                                                                                                                                  |                                                                                                                                                                   |                                                                                                                                                                   |
|------------------------|------------------------------------------------------------------------------------------------------------------------------------------------------------------|-------------------------------------------------------------------------------------------------------------------------------------------------------------------|-------------------------------------------------------------------------------------------------------------------------------------------------------------------|
|                        | $\Delta r_{(1)}$<br>$\Delta E_{\text{orb}(1)} = -13.8;$<br>$ n_1  = 0.23$                                                                                        | $\Delta r_{(2)}$<br>$\Delta E_{\text{orb}(2)} = -13.8;$<br>$ n_2  = 0.18$                                                                                         | $\Delta E_{\text{orb}(3)} = -11.0;$<br>$ n_3  = 0.15$                                                                                                             |
| <b>9Dy<sub>⊥</sub></b> | 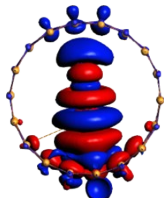<br>$\Delta r_{(1)}$<br>$\Delta E_{\text{orb}(1)} = -63.1;$<br>$ n_1  = 0.47$   | <br>$\Delta r_{(2)}$<br>$\Delta E_{\text{orb}(2)} = -11.1;$<br>$ n_2  = 0.14$   | <br>$\Delta r_{(3)}$<br>$\Delta E_{\text{orb}(3)} = -4.6;$<br>$ n_3  = 0.11$   |
| <b>9Tb<sub>∥</sub></b> | <br>$\Delta r_{(1)}$<br>$\Delta E_{\text{orb}(1)} = -16.1;$<br>$ n_1  = 0.18$   | <br>$\Delta r_{(2)}$<br>$\Delta E_{\text{orb}(2)} = -11.1;$<br>$ n_2  = 0.14$   | <br>$\Delta r_{(3)}$<br>$\Delta E_{\text{orb}(3)} = -8.2;$<br>$ n_3  = 0.12$   |
| <b>9Tb<sub>⊥</sub></b> | <br>$\Delta r_{(1)}$<br>$\Delta E_{\text{orb}(1)} = -47.0;$<br>$ n_1  = 0.36$ | <br>$\Delta r_{(2)}$<br>$\Delta E_{\text{orb}(1)} = -11.8;$<br>$ n_2  = 0.13$ | <br>$\Delta r_{(3)}$<br>$\Delta E_{\text{orb}(3)} = -5.8;$<br>$ n_3  = 0.11$ |

## SUPPORTING INFORMATION

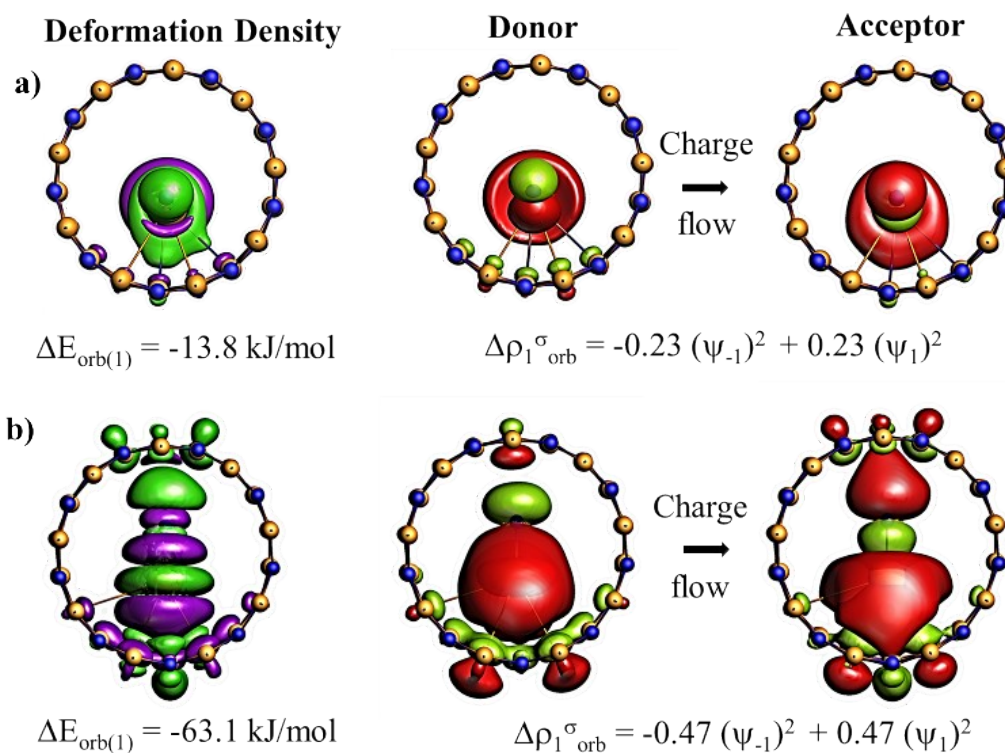

**Fig. S5** ETS-NOCV computed electron deformation density (EDD) plots along with corresponding donor and acceptor for  $9\text{Dy}_{\parallel}$  and  $9\text{Dy}_{\perp}$  computed at PBE-D3BJ/TZ2P level of theory. The EDD is plotted with an isosurface value of 0.00001 a.u., where the violet region shows charge depletion and the green region shows charge accumulation

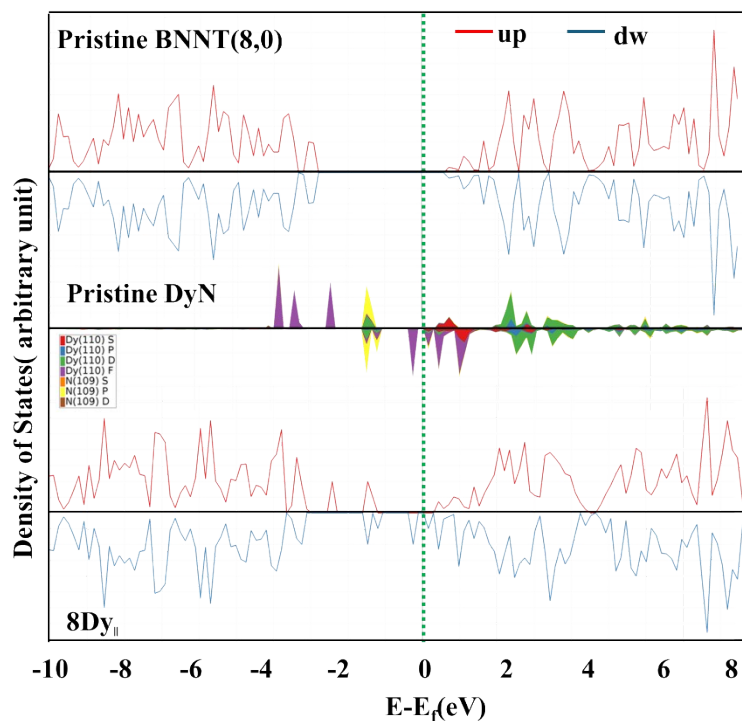

**Fig. S6** Density of States plot for  $8\text{Dy}_{\parallel}$ . The green dotted line shows the fermi-level.

## SUPPORTING INFORMATION

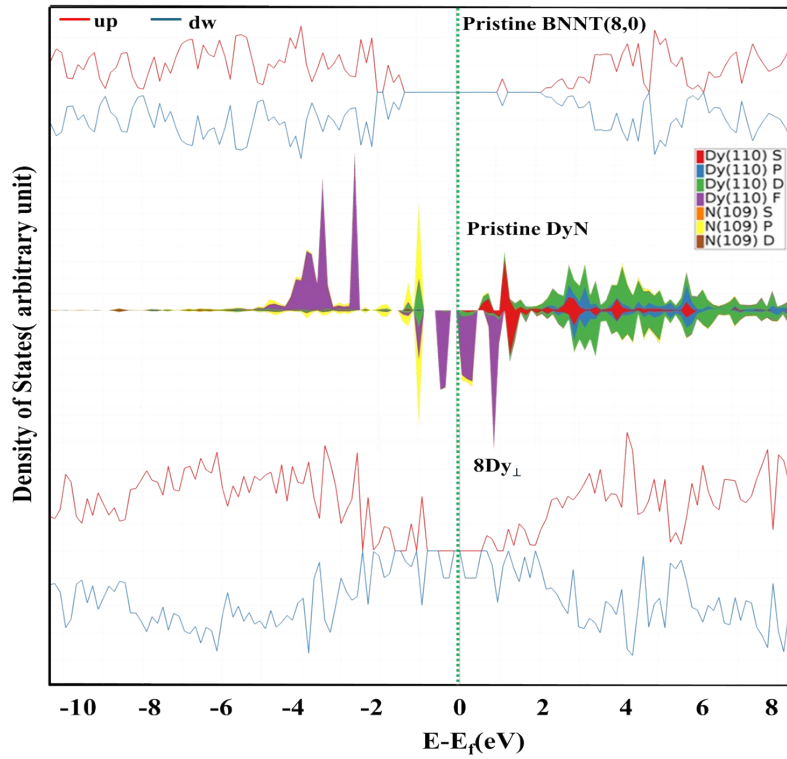

**Fig. S7** Density of States plot for  $8Dy_{\perp}$ . The green dotted line shows the fermi-level.

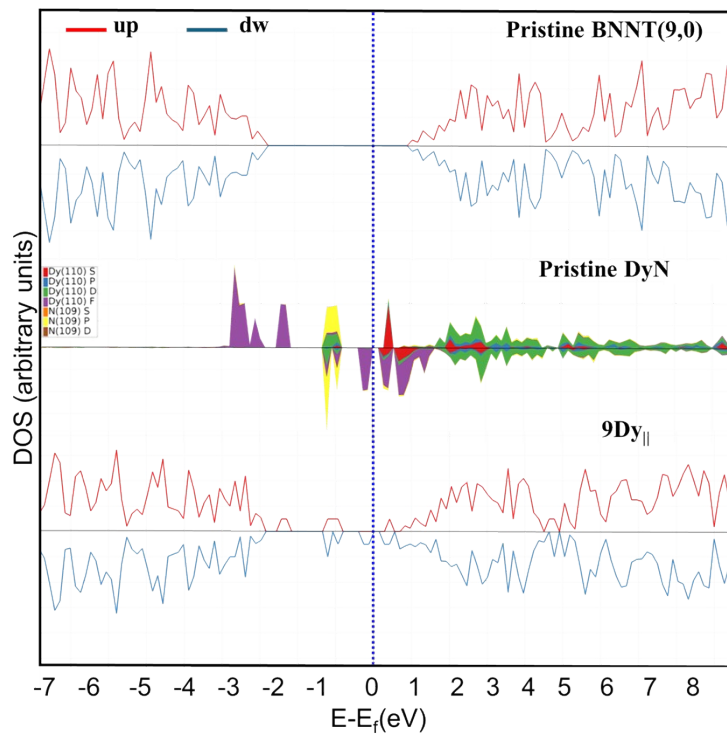

**Fig. S8** Density of States plot for  $9Dy_{\parallel}$ . The green dotted line shows the fermi-level.

## SUPPORTING INFORMATION

**Table S7** Basis set specification of several atoms in OpenMolcas.

| Atoms      | ANO-RCC basis functions |
|------------|-------------------------|
| H          | 2s                      |
| B          | 3s2p                    |
| N of [LnN] | 3s2p1d                  |
| N          | 3s2p                    |
| Dy, Tb     | 7s6p4d2f1g              |

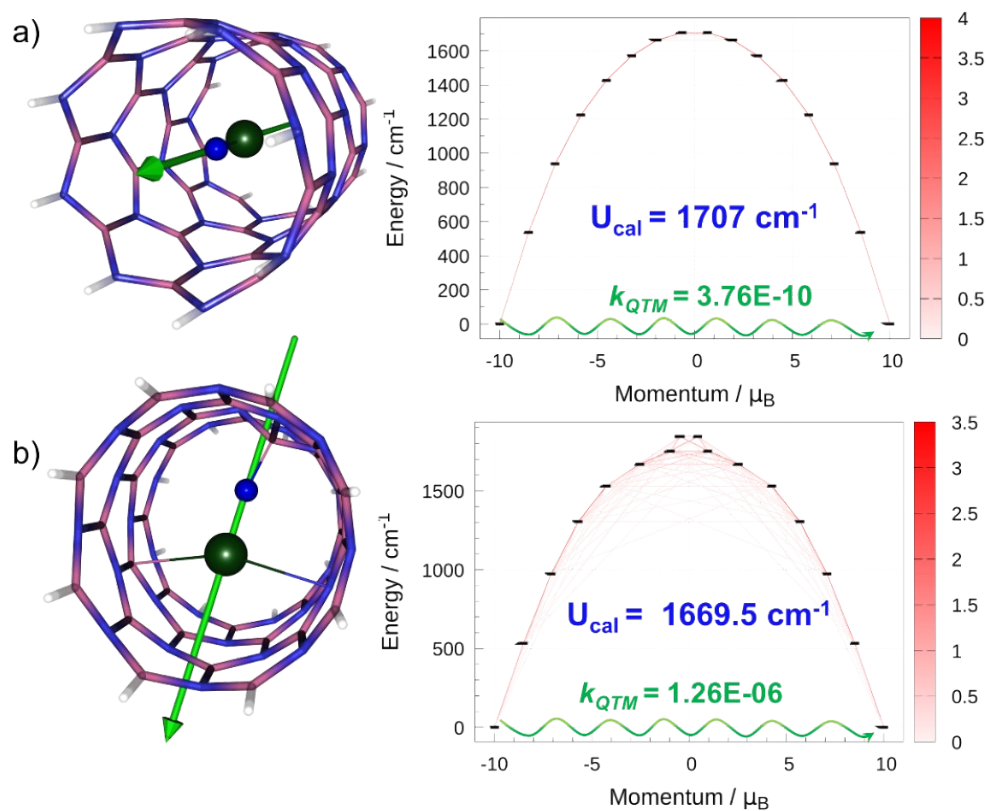

**Fig. S9** CASSCF computed g-tensor orientation in  $8Dy_{\parallel}$  and  $8Dy_{\perp}$ . The solid arrow denotes the main magnetic anisotropy axis ( $g_{zz}$ ). Color code: Dy (green), N(blue), B(pink).



## SUPPORTING INFORMATION

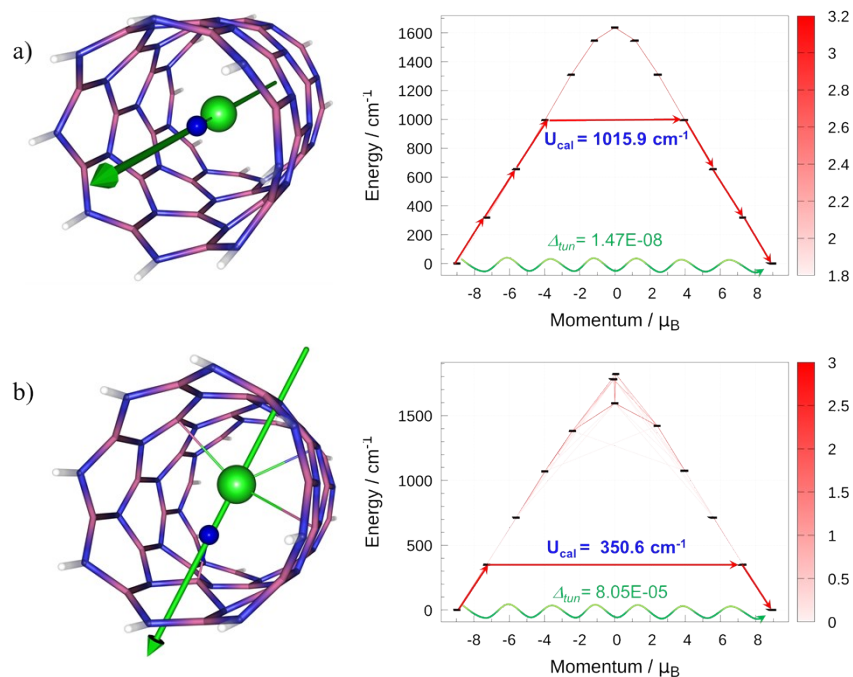

**Fig. S10** CASSCF computed  $g$ -tensor orientation in  $8\text{Tb}_{\parallel}$  and  $8\text{Tb}_{\perp}$ . The solid arrow denotes the main magnetic anisotropy axis ( $g_{zz}$ ). Color code: Tb (light- green), N(blue), B(pink).

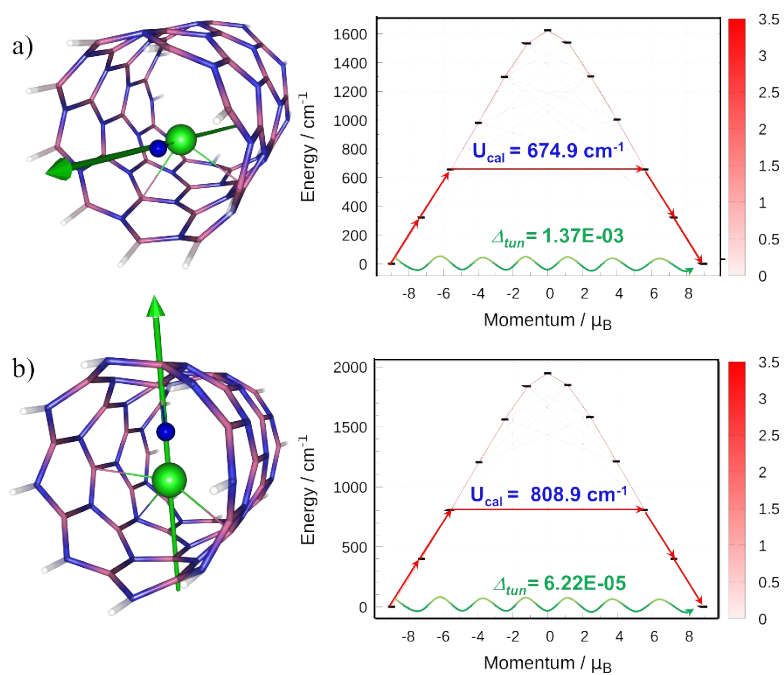

**Fig. S11** CASSCF computed  $g$ -tensor orientation in  $9\text{Tb}_{\parallel}$  and  $9\text{Tb}_{\perp}$ . The solid arrow denotes the main magnetic anisotropy axis ( $g_{zz}$ ). Color code: Tb (light- green), N(blue), B(pink).

## SUPPORTING INFORMATION

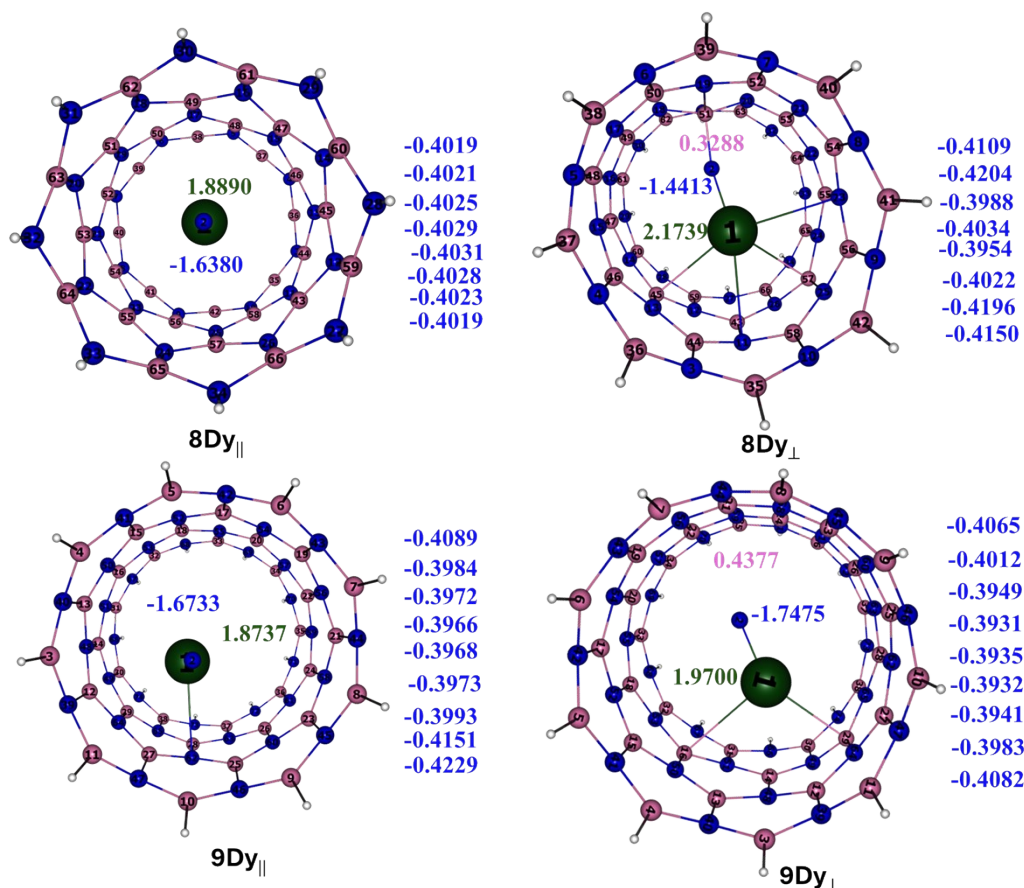

**Fig. S12** CASSCF computed LoProp charges on the nearest boron and nitrogen atoms of the [DyN] molecule. Color code: Dy (green), N(blue), B(pink).

**Table S8** SINGLE\_ANISO computed span of the eight low-lying KDs for complexes [DyN]@BNNT reported in  $\text{cm}^{-1}$ .

| Free   | 8Dy <sub>  </sub> | 9Dy <sub>  </sub> | 8Dy <sub>⊥</sub> | 9Dy <sub>⊥</sub> |
|--------|-------------------|-------------------|------------------|------------------|
| 0.0    | 0.0               | 0.0               | 0.0              | 0.0              |
| 521.6  | 537.4             | 513.8             | 533.4            | 569.5            |
| 934.9  | 938.3             | 905.7             | 972.7            | 1038.6           |
| 1250.7 | 1223.9            | 1194.3            | 1304.2           | 1400.6           |
| 1487.4 | 1427.5            | 1397.0            | 1531.0           | 1661.9           |
| 1657.5 | 1570.4            | 1537.6            | 1669.5           | 1835.8           |
| 1767.5 | 1662.2            | 1619.6            | 1752.2           | 1939.7           |
| 1821.4 | 1707.0            | 1666.8            | 1844.7           | 1989.1           |

**Table S9** CASSCF computed SOC states and corresponding g-tensor values [DyN] and [TbN] molecules and encapsulated [LnN]@BNNT. All the energies are reported in  $\text{cm}^{-1}$ .

| Pristine DyN | Pristine TbN |
|--------------|--------------|
|--------------|--------------|

## SUPPORTING INFORMATION

| SOC states<br>( ${}^6\text{H}_{15/2}$ ) | g-values |          |          | $k_{QTM}$ | SOC states<br>( ${}^7\text{F}_6$ ) | g-values |          |          | $\Delta_{tun}$ |
|-----------------------------------------|----------|----------|----------|-----------|------------------------------------|----------|----------|----------|----------------|
|                                         | $g_{xx}$ | $g_{yy}$ | $g_{zz}$ |           |                                    | $g_{xx}$ | $g_{yy}$ | $g_{zz}$ |                |
| 0.0                                     | 0.000    | 0.000    | 20.012   | 6.4E-20   | 0.00                               | 0.000    | 0.000    | 18.014   | 0.00E+00       |
| 521.6                                   | 0.000    | 0.000    | 17.051   | 2.0E-17   | 373.97                             | 0.000    | 0.000    | 14.514   | 0.00E+00       |
| 934.9                                   | 0.000    | 0.000    | 14.293   | 8.2E-13   | 756.30                             | 0.000    | 0.000    | 11.098   | 0.00E+00       |
| 1250.8                                  | 0.000    | 0.000    | 11.638   | 2.5E-09   | 1133.32                            | 0.000    | 0.000    | 7.843    | 0.00E+00       |
| 1487.4                                  | 0.000    | 0.000    | 9.023    | 4.4E-09   | 1475.36                            | 0.000    | 0.000    | 4.875    | 6.23E-07       |
| 1657.5                                  | 0.000    | 0.000    | 6.431    | 6.5E-09   | 1726.91                            | 0.000    | 0.000    | 2.297    | 1.79E-07       |
| 1767.6                                  | 0.000    | 0.000    | 3.855    | 3.4E-08   | 1820.91                            |          |          |          |                |
| 1821.4                                  | 10.598   | 10.598   | 1.284    | 3.5E+00   |                                    |          |          |          |                |

| Calculations for [DyN]@BNNT             |          |          |          |           |                                         |          |          |          |           |
|-----------------------------------------|----------|----------|----------|-----------|-----------------------------------------|----------|----------|----------|-----------|
| 8Dy $_{\parallel}$                      |          |          |          |           | 8Dy $_{\perp}$                          |          |          |          |           |
| SOC states<br>( ${}^6\text{H}_{15/2}$ ) | g-values |          |          | $k_{QTM}$ | SOC states<br>( ${}^6\text{H}_{15/2}$ ) | g-values |          |          | $k_{QTM}$ |
|                                         | $g_{xx}$ | $g_{yy}$ | $g_{zz}$ |           |                                         | $g_{xx}$ | $g_{yy}$ | $g_{zz}$ |           |
| 0.0                                     | 0.000    | 0.000    | 20.009   | 3.76E-10  | 0.0                                     | 0.000    | 0.000    | 20.005   | 1.26E-06  |
| 537.4                                   | 0.000    | 0.000    | 17.037   | 2.40E-08  | 533.4                                   | 0.000    | 0.000    | 17.022   | 9.99E-05  |
| 938.3                                   | 0.000    | 0.000    | 14.308   | 1.15E-07  | 972.7                                   | 0.008    | 0.009    | 14.177   | 2.96E-03  |
| 1223.9                                  | 0.001    | 0.001    | 11.679   | 3.36E-04  | 1304.2                                  | 0.167    | 0.181    | 11.398   | 5.80E-02  |
| 1427.5                                  | 0.013    | 0.015    | 9.071    | 4.64E-03  | 1531.0                                  | 1.244    | 1.337    | 8.564    | 4.32E-01  |
| 1570.4                                  | 0.012    | 0.016    | 6.471    | 4.67E-03  | 1669.5                                  | 5.790    | 5.251    | 4.262    | 1.70E+00  |
| 1662.2                                  | 0.106    | 0.110    | 3.880    | 3.60E-02  | 1752.2                                  | 1.664    | 4.514    | 13.479   | 2.76E+00  |
| 1707.0                                  | 10.713   | 10.496   | 1.293    | 3.53E+00  | 1844.7                                  | 0.110    | 0.252    | 19.413   | 4.93E-01  |
| 9Dy $_{\parallel}$                      |          |          |          |           | 9Dy $_{\perp}$                          |          |          |          |           |
| SOC states<br>( ${}^6\text{H}_{15/2}$ ) | g-values |          |          | $k_{QTM}$ | SOC states<br>( ${}^6\text{H}_{15/2}$ ) | g-values |          |          | $k_{QTM}$ |
|                                         | $g_{xx}$ | $g_{yy}$ | $g_{zz}$ |           |                                         | $g_{xx}$ | $g_{yy}$ | $g_{zz}$ |           |
| 0.0                                     | 0.000    | 0.000    | 20.007   | 3.91E-07  | 0.0                                     | 0.000    | 0.000    | 20.009   | 1.27E-07  |
| 513.8                                   | 0.002    | 0.002    | 17.064   | 7.02E-04  | 569.5                                   | 0.000    | 0.000    | 17.015   | 2.35E-05  |
| 905.7                                   | 0.003    | 0.004    | 14.325   | 1.22E-03  | 1038.6                                  | 0.003    | 0.003    | 14.227   | 9.06E-04  |
| 1194.3                                  | 0.031    | 0.036    | 11.650   | 1.12E-02  | 1400.6                                  | 0.003    | 0.008    | 11.576   | 1.82E-03  |
| 1397.0                                  | 2.318    | 2.343    | 8.904    | 7.78E-01  | 1661.9                                  | 0.383    | 0.400    | 8.985    | 1.31E-01  |
| 1537.6                                  | 1.727    | 2.859    | 6.469    | 7.98E-01  | 1835.8                                  | 1.202    | 2.044    | 6.364    | 5.43E-01  |
| 1619.6                                  | 5.604    | 4.634    | 3.350    | 1.66E+00  | 1939.7                                  | 5.050    | 3.684    | 1.512    | 1.10E+00  |
| 1666.8                                  | 1.013    | 5.319    | 15.261   | 3.58E+00  | 1989.1                                  | 1.172    | 7.197    | 13.682   | 3.47E+00  |

| Calculations for [TbN]@BNNT     |          |          |          |                |                                 |          |          |          |                |
|---------------------------------|----------|----------|----------|----------------|---------------------------------|----------|----------|----------|----------------|
| 8Tb $_{\parallel}$              |          |          |          |                | 8Tb $_{\perp}$                  |          |          |          |                |
| SOC states ( ${}^7\text{F}_6$ ) | g-values |          |          | $\Delta_{tun}$ | SOC states ( ${}^7\text{F}_6$ ) | g-values |          |          | $\Delta_{tun}$ |
|                                 | $g_{xx}$ | $g_{yy}$ | $g_{zz}$ |                |                                 | $g_{xx}$ | $g_{yy}$ | $g_{zz}$ |                |
| 0.00, 0.00                      | 0.000    | 0.000    | 17.939   | 1.47E-08       | 0.00, 0.00                      | 0.000    | 0.000    | 17.937   | 8.05E-05       |
| 329.10, 329.10                  | 0.000    | 0.000    | 14.587   | 1.98E-07       | 350.55, 350.56                  | 0.000    | 0.000    | 14.555   | 1.09E-02       |
| 674.52, 674.52                  | 0.000    | 0.000    | 11.268   | 5.43E-04       | 712.33, 712.73                  | 0.000    | 0.000    | 11.214   | 4.02E-01       |
| 1015.87, 1015.94                | 0.000    | 0.000    | 8.071    | 6.73E-02       | 1069.82, 1074.66                | 0.000    | 0.000    | 7.957    | 4.84E+00       |
| 1321.96, 1321.98                | 0.000    | 0.000    | 5.104    | 2.15E-02       | 1382.25, 1421.98                | 0.000    | 0.000    | 4.820    | 3.97E+01       |

## SUPPORTING INFORMATION

|                                               |                       |                                             |                                               |                       |                                             |
|-----------------------------------------------|-----------------------|---------------------------------------------|-----------------------------------------------|-----------------------|---------------------------------------------|
| 1544.09, 1626.48                              | 0.000 0.000 13.370    | 8.24E+01                                    | 1779.79, 1821.02                              | 0.000 0.000 15.403    | 4.12E+01                                    |
| <b>9Tb<sub>  </sub></b>                       |                       |                                             | <b>9Tb<sub>⊥</sub></b>                        |                       |                                             |
| <b>SOC states (<sup>7</sup>F<sub>6</sub>)</b> | <b>g-values</b>       |                                             | <b>SOC states (<sup>7</sup>F<sub>6</sub>)</b> | <b>g-values</b>       |                                             |
|                                               | <b>g<sub>xx</sub></b> | <b>g<sub>yy</sub></b> <b>g<sub>zz</sub></b> | <b>A<sub>tun</sub></b>                        | <b>g<sub>xx</sub></b> | <b>g<sub>yy</sub></b> <b>g<sub>zz</sub></b> |
| 0.00, 0.00                                    | 0.000                 | 0.000 17.938                                | 1.37E-03                                      | 0.000                 | 0.000 17.941                                |
| 331.90, 331.90                                | 0.000                 | 0.000 14.583                                | 6.18E-03                                      | 400.80, 400.80        | 0.000 0.000 14.498                          |
| 674.69, 674.93                                | 0.000                 | 0.000 11.269                                | 2.42E-01                                      | 808.90, 808.91        | 0.000 0.000 11.122                          |
| 1001.35, 1022.20                              | 0.000                 | 0.000 8.083                                 | 2.09E+01                                      | 1206.21, 1212.29      | 0.000 0.000 7.886                           |
| 1311.13, 1315.53                              | 0.000                 | 0.000 5.115                                 | 4.40E+00                                      | 1564.06, 1581.49      | 0.000 0.000 4.908                           |
| 1529.51, 1535.73                              | 0.000                 | 0.000 2.452                                 | 6.22E+00                                      | 1839.15, 1848.82      | 0.000 0.000 2.299                           |

**Table S10** SINGLE\_ANISO computed wave function decomposition analysis for the **DyN@BNNT** centre.

| $\pm mJ$ | [DyN]         | 8Dy <sub>  </sub> | 8Dy <sub>⊥</sub> | 9Dy <sub>  </sub> | 9Dy <sub>⊥</sub> |
|----------|---------------|-------------------|------------------|-------------------|------------------|
| KD1      | 100 %  ±15/2⟩ | 100 %  ±15/2⟩     | 100 %  ±15/2⟩    | 100 %  ±15/2⟩     | 100 %  ±15/2⟩    |
| KD2      | 100 %  ±13/2⟩ | 100 %  ±13/2⟩     | 99.7 %  ±13/2⟩   | 99.7 %  ±13/2⟩    | 100 %  ±13/2⟩    |
| KD3      | 100 %  ±11/2⟩ | 99.9 %  ±11/2⟩    | 98.4 %  ±11/2⟩   | 98.1 %  ±11/2⟩    | 100 %  ±11/2⟩    |
| KD4      | 100 %  ±9/2⟩  | 99.9 %  ±9/2⟩     | 95.1 %  ±9/2⟩    | 96.0 %  ±9/2⟩     | 100 %  ±9/2⟩     |
| KD5      | 99.9 %  ±7/2⟩ | 100 %  ±7/2⟩      | 98.1 %  ±7/2⟩    | 95.3 %  ±7/2⟩     | 99.7 %  ±7/2⟩    |
| KD6      | 99.9 %  ±5/2⟩ | 99.6 %  ±5/2⟩     | 98.6 %  ±5/2⟩    | 98.6 %  ±5/2⟩     | 98.2 %  ±5/2⟩    |
| KD7      | 99.8 %  ±3/2⟩ | 100 %  ±3/2⟩      | 94.2 %  ±3/2⟩    | 98.1 %  ±3/2⟩     | 92.1 %  ±3/2⟩    |
| KD8      | 99.8 %  ±1/2⟩ | 95.8 %  ±1/2⟩     | 98.4 %  ±1/2⟩    | 97.8 %  ±1/2⟩     | 93.0 %  ±1/2⟩    |

**Table S11** SINGLE\_ANISO computed wave function decomposition analysis for the **TbN@BNNT** centre.

| $\pm mJ$ | [DyN]      | 8Tb <sub>  </sub> | 8Tb <sub>⊥</sub> | 9Tb <sub>  </sub> | 9Tb <sub>⊥</sub> |
|----------|------------|-------------------|------------------|-------------------|------------------|
| KD1      | 100 %  ±6⟩ | 100 %  ±6⟩        | 100 %  ±6⟩       | 100 %  ±6⟩        | 100 %  ±6⟩       |
| KD2      | 100 %  ±5⟩ | 100 %  ±5⟩        | 100 %  ±5⟩       | 100 %  ±5⟩        | 100 %  ±5⟩       |
| KD3      | 100 %  ±4⟩ | 100 %  ±4⟩        | 100 %  ±4⟩       | 100 %  ±4⟩        | 100 %  ±4⟩       |
| KD4      | 100 %  ±3⟩ | 100 %  ±3⟩        | 100 %  ±3⟩       | 100 %  ±3⟩        | 100 %  ±3⟩       |
| KD5      | 100 %  ±2⟩ | 100 %  ±2⟩        | 100 %  ±2⟩       | 100 %  ±2⟩        | 100 %  ±2⟩       |
| KD6      | 100 %  ±1⟩ | 100 %  ±1⟩        | 100 %  ±1⟩       | 100 %  ±1⟩        | 100 %  ±1⟩       |
| KD7      | 100 %  0⟩  | 100 %  0⟩         | 100 %  0⟩        | 100 %  0⟩         | 100 %  0⟩        |

**Table S12** SINGLE\_ANISO computed crystal field parameters for [**DyN**]@BNNT. The CF

parameters were computed using the following equation, 
$$H_{CF} = \sum_{k=-q}^q B_k^q O_k^q$$
 and here  $B_k^q$  and  $O_k^q$  are the crystal field parameters and Steven's operator, respectively.

| k | q | [DyN] | 8Dy <sub>  </sub> | 8Dy <sub>⊥</sub> | 9Dy <sub>  </sub> | 9Dy <sub>⊥</sub> |
|---|---|-------|-------------------|------------------|-------------------|------------------|
|---|---|-------|-------------------|------------------|-------------------|------------------|

## SUPPORTING INFORMATION

|   |    |                  |                  |                  |                  |                  |
|---|----|------------------|------------------|------------------|------------------|------------------|
| 2 | -2 | 2.13E-08         | 1.37E-02         | -2.44E-01        | 1.10E-01         | -4.31E-02        |
| 2 | -1 | -1.92E-09        | 1.16E-01         | 5.84E-01         | -5.42E-01        | -5.89E-02        |
| 2 | 0  | <b>-2.43E+01</b> | <b>-2.24E+01</b> | <b>-2.26E+01</b> | <b>-9.75E+00</b> | <b>-1.19E+01</b> |
| 2 | 1  | 2.16E-08         | -1.01E-01        | -1.37E+00        | 1.29E+00         | 1.27E-01         |
| 2 | 2  | -8.42E-09        | -7.19E-03        | 4.82E-01         | -1.96E-01        | 1.29E-01         |
| 4 | -4 | -2.21E-10        | 8.29E-06         | -6.05E-04        | 2.25E-04         | -3.53E-04        |
| 4 | -3 | -2.82E-09        | 1.02E-05         | -5.48E-05        | -1.47E-03        | 6.30E-04         |
| 4 | -2 | -1.21E-11        | -6.17E-05        | -1.17E-03        | -1.21E-03        | -6.55E-04        |
| 4 | -1 | -4.04E-11        | 3.89E-04         | 7.94E-05         | 1.37E-03         | 4.10E-05         |
| 4 | 0  | <b>-3.57E-02</b> | <b>-4.76E-02</b> | <b>-4.72E-02</b> | <b>-4.98E-03</b> | <b>-4.90E-03</b> |
| 4 | 1  | 1.57E-11         | -3.15E-04        | -2.20E-05        | -3.31E-03        | -3.08E-03        |
| 4 | 2  | 1.39E-10         | 4.46E-05         | 7.41E-04         | 1.29E-03         | -1.87E-05        |
| 4 | 3  | 8.11E-10         | 1.66E-05         | -3.04E-04        | 4.60E-04         | -1.91E-03        |
| 4 | 4  | 3.84E-10         | 2.62E-05         | -1.57E-04        | 8.77E-04         | 1.30E-03         |
| 6 | -6 | 5.60E-12         | 1.66E-05         | -6.35E-04        | 1.30E-05         | -8.19E-06        |
| 6 | -5 | 4.32E-11         | -8.78E-07        | -3.70E-04        | 3.40E-05         | 1.37E-05         |
| 6 | -4 | -5.37E-12        | 3.40E-07         | -2.62E-05        | 3.05E-07         | -6.77E-06        |
| 6 | -3 | -7.67E-12        | 2.61E-07         | -1.71E-05        | -1.98E-05        | 1.07E-05         |
| 6 | -2 | -1.05E-12        | 7.04E-07         | 1.82E-04         | 6.67E-06         | 1.49E-06         |
| 6 | -1 | 4.92E-12         | -1.55E-04        | <b>-6.64E-04</b> | 4.48E-05         | 7.68E-06         |
| 6 | 0  | <b>-2.23E-04</b> | <b>-3.40E-04</b> | -4.29E-04        | 1.63E-07         | 1.39E-05         |
| 6 | 1  | -2.51E-11        | 1.33E-04         | 1.55E-03         | <b>-1.06E-04</b> | 4.71E-05         |
| 6 | 2  | 4.68E-11         | 1.37E-06         | -2.80E-04        | -3.10E-06        | 4.22E-05         |
| 6 | 3  | -5.16E-11        | 1.35E-07         | 4.00E-05         | -4.01E-07        | <b>-4.40E-05</b> |
| 6 | 4  | 1.15E-11         | -3.02E-07        | -4.35E-06        | 3.58E-06         | -3.97E-05        |
| 6 | 5  | 1.78E-10         | 8.40E-07         | -2.36E-04        | 1.09E-04         | -9.93E-05        |
| 6 | 6  | 2.32E-11         | -9.93E-06        | -7.95E-04        | -1.49E-04        | 3.77E-05         |
| 8 | -8 | -2.45E-13        | 1.33E-07         | 5.58E-08         | -7.15E-10        | -1.50E-10        |
| 8 | -7 | -3.32E-12        | 2.85E-08         | -2.14E-07        | 2.65E-09         | 1.40E-09         |
| 8 | -6 | -2.58E-13        | 6.05E-08         | -2.27E-06        | -5.67E-09        | 3.52E-09         |
| 8 | -5 | 3.85E-13         | -1.05E-08        | -3.69E-06        | -5.01E-08        | -2.73E-08        |
| 8 | -4 | 7.53E-14         | 4.26E-09         | -2.87E-07        | -1.14E-09        | 1.71E-08         |
| 8 | -3 | 8.95E-15         | 4.21E-09         | 2.21E-08         | 1.00E-07         | -6.25E-08        |
| 8 | -2 | 4.62E-13         | 5.90E-09         | 1.47E-06         | -1.61E-08        | 4.21E-09         |
| 8 | -1 | -6.47E-15        | -2.98E-07        | -1.33E-06        | -4.36E-08        | -9.05E-09        |
| 8 | 0  | <b>-7.18E-07</b> | <b>-8.98E-07</b> | -1.04E-06        | 4.02E-09         | -3.01E-09        |
| 8 | 1  | -6.07E-14        | 2.57E-07         | <b>3.13E-06</b>  | 1.02E-07         | -4.23E-08        |
| 8 | 2  | 8.24E-13         | 1.43E-08         | -2.39E-06        | 1.59E-09         | -2.22E-07        |
| 8 | 3  | -1.86E-12        | 1.86E-09         | 2.90E-07         | -1.35E-08        | <b>2.59E-07</b>  |
| 8 | 4  | 8.62E-13         | -1.83E-09        | -3.51E-08        | -8.26E-09        | 1.02E-07         |
| 8 | 5  | 5.99E-12         | 1.25E-08         | -2.35E-06        | <b>-1.71E-07</b> | 2.03E-07         |
| 8 | 6  | 5.25E-13         | -3.46E-08        | -2.85E-06        | 4.93E-08         | -1.58E-08        |
| 8 | 7  | -1.73E-12        | -6.07E-10        | -1.01E-06        | -5.42E-09        | -6.41E-09        |
| 8 | 8  | 9.04E-13         | 1.43E-07         | -7.25E-08        | 1.24E-09         | -2.07E-10        |

## SUPPORTING INFORMATION

**Table S13** SINGLE\_ANISO computed crystal field parameters for [TbN]@BNNT. The CF

parameters were computed using the following equation, 
$$H_{CF} = \sum_{k=-q}^q B_k^q O_k^q$$
 and here  $B_k^q$  and  $O_k^q$  are the crystal field parameters and Steven's operator, respectively.

| k | q  | [TbN]            | 8Tb <sub>  </sub> | 8Tb <sub>⊥</sub> | 9Tb <sub>  </sub> | 9Tb <sub>⊥</sub> |
|---|----|------------------|-------------------|------------------|-------------------|------------------|
| 2 | -2 | 5.51E-09         | 4.07E-03          | -5.58E-03        | -4.76E-02         | -9.62E-02        |
| 2 | -1 | 3.98E-09         | 8.22E-04          | -1.90E-01        | 1.67E-03          | 1.14E-02         |
| 2 | 0  | <b>-1.66E+01</b> | <b>-1.49E+01</b>  | <b>-1.53E+01</b> | <b>-1.48E+01</b>  | <b>-1.82E+01</b> |
| 2 | 1  | 4.70E-09         | -9.56E-03         | -4.79E-02        | -9.78E-01         | -2.52E-01        |
| 2 | 2  | 9.07E-09         | 6.00E-03          | -2.31E-01        | -2.97E-01         | 5.91E-02         |
| 4 | -4 | -1.03E-10        | -5.27E-06         | -8.14E-05        | -1.96E-03         | 3.28E-03         |
| 4 | -3 | -2.03E-10        | 2.80E-05          | -1.57E-05        | 4.77E-04          | -2.70E-03        |
| 4 | -2 | -8.74E-11        | 1.77E-06          | -1.83E-05        | 1.45E-04          | 1.96E-03         |
| 4 | -1 | -3.26E-11        | 2.57E-05          | 2.29E-03         | -3.03E-05         | -2.97E-05        |
| 4 | 0  | <b>2.19E-02</b>  | <b>2.17E-02</b>   | <b>2.22E-02</b>  | <b>2.10E-02</b>   | <b>2.82E-02</b>  |
| 4 | 1  | -5.18E-11        | 1.13E-04          | 5.67E-04         | 1.24E-02          | 4.61E-03         |
| 4 | 2  | -8.17E-11        | -1.84E-05         | 7.54E-04         | -8.79E-04         | -2.63E-04        |
| 4 | 3  | -5.10E-11        | 6.42E-06          | -1.48E-04        | -4.44E-03         | 1.01E-03         |
| 4 | 4  | -2.05E-10        | -6.71E-06         | -1.43E-04        | 6.43E-04          | -3.40E-03        |
| 6 | -6 | 6.66E-14         | 1.14E-06          | -1.32E-06        | 2.34E-04          | 8.98E-05         |
| 6 | -5 | 8.21E-12         | -6.25E-07         | 5.19E-06         | -1.71E-04         | -1.10E-04        |
| 6 | -4 | 4.51E-13         | -1.72E-08         | -9.68E-08        | 1.02E-05          | -2.35E-05        |
| 6 | -3 | 3.24E-12         | -2.26E-07         | -1.58E-06        | 1.79E-06          | 3.38E-07         |
| 6 | -2 | 1.41E-12         | -1.04E-07         | 7.64E-07         | -2.72E-06         | -2.14E-05        |
| 6 | -1 | 5.62E-14         | -1.72E-06         | -4.16E-06        | 4.72E-07          | -5.35E-06        |
| 6 | 0  | <b>-7.97E-05</b> | <b>-7.99E-05</b>  | <b>-8.08E-05</b> | <b>-7.95E-05</b>  | <b>-1.31E-04</b> |
| 6 | 1  | 3.32E-13         | -1.49E-07         | -6.91E-07        | -5.81E-05         | -8.61E-05        |
| 6 | 2  | 4.33E-13         | 1.75E-07          | -1.11E-05        | 3.33E-05          | -1.85E-05        |
| 6 | 3  | 7.90E-13         | 5.12E-08          | 1.29E-06         | 1.68E-05          | 1.28E-05         |
| 6 | 4  | 1.12E-12         | 1.13E-07          | 5.11E-07         | -6.50E-06         | 6.72E-05         |
| 6 | 5  | -2.02E-11        | 2.13E-07          | 8.64E-07         | 1.94E-04          | 6.86E-05         |
| 6 | 6  | 2.77E-13         | 8.90E-08          | 2.33E-05         | -2.67E-04         | -6.38E-05        |
| 8 | -8 | -1.13E-19        | 3.46E-12          | 6.12E-11         | -4.09E-08         | 2.51E-09         |
| 8 | -7 | -4.48E-15        | 4.24E-12          | 1.75E-09         | 1.74E-07          | 4.05E-08         |
| 8 | -6 | -1.45E-15        | -4.75E-09         | 5.59E-09         | -9.67E-07         | -3.85E-07        |
| 8 | -5 | -1.10E-13        | 1.18E-08          | -1.04E-07        | 3.27E-06          | 2.25E-06         |
| 8 | -4 | 6.08E-15         | 6.75E-10          | 7.77E-09         | -8.33E-08         | 2.34E-07         |
| 8 | -3 | -1.38E-13        | 5.03E-09          | 6.64E-08         | -9.92E-08         | 4.48E-07         |
| 8 | -2 | -1.62E-14        | 2.97E-09          | -1.95E-08        | 5.26E-08          | 2.64E-07         |
| 8 | -1 | -8.03E-15        | 8.91E-09          | -4.18E-08        | -8.50E-10         | 3.70E-08         |
| 8 | 0  | <b>8.45E-08</b>  | <b>9.32E-08</b>   | 9.15E-08         | 9.69E-08          | 2.01E-07         |
| 8 | 1  | -4.96E-15        | -2.16E-09         | -1.16E-08        | 5.65E-09          | 4.00E-07         |
| 8 | 2  | 6.68E-15         | -1.77E-09         | <b>1.88E-07</b>  | <b>-8.08E-07</b>  | <b>7.21E-07</b>  |
| 8 | 3  | -2.64E-14        | -2.60E-09         | -2.78E-08        | -1.29E-07         | -7.16E-07        |
| 8 | 4  | -3.41E-15        | -1.79E-09         | 3.06E-10         | 1.12E-07          | -1.30E-06        |
| 8 | 5  | 3.53E-13         | -4.18E-09         | -1.61E-08        | -3.68E-06         | -1.43E-06        |
| 8 | 6  | -2.62E-15        | -3.65E-10         | -9.84E-08        | 1.10E-06          | 2.74E-07         |
| 8 | 7  | -2.95E-14        | -1.61E-12         | 6.41E-10         | -2.05E-07         | -2.33E-08        |
| 8 | 8  | -7.53E-20        | -2.48E-12         | -2.51E-09        | 5.74E-08          | -5.14E-09        |

## SUPPORTING INFORMATION

**Table S14** pDFT optimized coordinates of LnN@BNNT.

| <b>8Dy<sub>  </sub></b> |         |        |         | <b>8Dy<sub>⊥</sub></b> |         |        |         |
|-------------------------|---------|--------|---------|------------------------|---------|--------|---------|
| N                       | 11.5037 | 4.8163 | 1.3907  | N                      | 11.5909 | 4.8027 | 1.3922  |
| N                       | 11.0168 | 6.0059 | 3.5189  | N                      | 11.0497 | 5.9535 | 3.5251  |
| N                       | 10.1046 | 6.9108 | 1.3908  | N                      | 10.0889 | 6.8252 | 1.3996  |
| N                       | 8.9190  | 7.4085 | 3.5186  | N                      | 8.8892  | 7.2644 | 3.5272  |
| N                       | 7.6342  | 7.4021 | 1.3904  | N                      | 7.6179  | 7.3287 | 1.3930  |
| N                       | 6.4434  | 6.9171 | 3.5182  | N                      | 6.3996  | 6.8872 | 3.5135  |
| N                       | 5.5394  | 6.0034 | 1.3902  | N                      | 5.4637  | 6.0227 | 1.3801  |
| N                       | 5.0397  | 4.8188 | 3.5181  | N                      | 4.9380  | 4.8420 | 3.5064  |
| N                       | 5.0470  | 3.5329 | 1.3901  | N                      | 4.9856  | 3.5555 | 1.3768  |
| N                       | 5.5322  | 2.3423 | 3.5181  | N                      | 5.4894  | 2.3756 | 3.5062  |
| N                       | 6.4469  | 1.4384 | 1.3903  | N                      | 6.4548  | 1.5138 | 1.3821  |
| N                       | 7.6318  | 0.9403 | 3.5182  | N                      | 7.6445  | 1.0737 | 3.5181  |
| N                       | 8.9176  | 0.9470 | 1.3902  | N                      | 8.9320  | 1.0405 | 1.3980  |
| N                       | 10.1070 | 1.4331 | 3.5183  | N                      | 10.1367 | 1.4953 | 3.5271  |
| N                       | 11.0124 | 2.3459 | 1.3903  | N                      | 11.0909 | 2.3370 | 1.3944  |
| N                       | 11.5085 | 3.5311 | 3.5187  | N                      | 11.6548 | 3.5086 | 3.5169  |
| N                       | 11.4608 | 4.8078 | 5.6552  | N                      | 11.6841 | 4.7998 | 5.6527  |
| N                       | 11.0302 | 6.0147 | 7.7878  | N                      | 11.0161 | 5.9191 | 7.7854  |
| N                       | 10.0801 | 6.8740 | 5.6552  | N                      | 10.0284 | 6.6945 | 5.6588  |
| N                       | 8.9228  | 7.4246 | 7.7878  | N                      | 8.8773  | 7.2580 | 7.7796  |
| N                       | 7.6434  | 7.3577 | 5.6552  | N                      | 7.5941  | 7.3090 | 5.6499  |
| N                       | 6.4346  | 6.9315 | 7.7879  | N                      | 6.3584  | 6.9814 | 7.7814  |
| N                       | 5.5793  | 5.9776 | 5.6551  | N                      | 5.4031  | 6.0687 | 5.6434  |
| N                       | 5.0242  | 4.8225 | 7.7880  | N                      | 4.9039  | 4.8985 | 7.7839  |
| N                       | 5.0959  | 3.5429 | 5.6552  | N                      | 5.0566  | 3.5751 | 5.6365  |
| N                       | 5.5198  | 2.3338 | 7.7880  | N                      | 5.4899  | 2.3188 | 7.7850  |
| N                       | 6.4743  | 1.4784 | 5.6551  | N                      | 6.4050  | 1.4508 | 5.6432  |
| N                       | 7.6293  | 0.9245 | 7.7877  | N                      | 7.6310  | 0.9515 | 7.7797  |
| N                       | 8.9094  | 0.9912 | 5.6549  | N                      | 8.9032  | 1.1844 | 5.6558  |
| N                       | 10.1167 | 1.4195 | 7.7874  | N                      | 10.0916 | 1.5675 | 7.7801  |
| N                       | 10.9761 | 2.3703 | 5.6548  | N                      | 11.1338 | 2.3438 | 5.6554  |
| N                       | 11.5245 | 3.5281 | 7.7875  | N                      | 11.6823 | 3.5058 | 7.7955  |
| N                       | 11.5026 | 4.8161 | 9.9146  | N                      | 11.6068 | 4.8012 | 9.9231  |
| N                       | 11.0116 | 6.0020 | 12.0431 | N                      | 11.0348 | 5.9633 | 12.0465 |
| N                       | 10.1044 | 6.9100 | 9.9148  | N                      | 10.0751 | 6.8023 | 9.9107  |
| N                       | 8.9184  | 7.4009 | 12.0430 | N                      | 8.9000  | 7.2999 | 12.0434 |
| N                       | 7.6348  | 7.4015 | 9.9146  | N                      | 7.6108  | 7.3319 | 9.9110  |
| N                       | 6.4490  | 6.9099 | 12.0427 | N                      | 6.4147  | 6.8999 | 12.0407 |
| N                       | 5.5405  | 6.0033 | 9.9145  | N                      | 5.4425  | 6.0536 | 9.9124  |
| N                       | 5.0492  | 4.8170 | 12.0427 | N                      | 4.9727  | 4.8410 | 12.0269 |
| N                       | 5.0491  | 3.5336 | 9.9146  | N                      | 5.0238  | 3.5634 | 9.8923  |
| N                       | 5.5404  | 2.3475 | 12.0428 | N                      | 5.5299  | 2.3887 | 12.0279 |

## SUPPORTING INFORMATION

|   |         |        |         |   |         |        |         |
|---|---------|--------|---------|---|---------|--------|---------|
| N | 6.4483  | 1.4401 | 9.9146  | N | 6.4430  | 1.4690 | 9.9128  |
| N | 7.6340  | 0.9486 | 12.0427 | N | 7.6554  | 1.0379 | 12.0429 |
| N | 8.9177  | 0.9480 | 9.9144  | N | 8.9259  | 1.0398 | 9.9092  |
| N | 10.1037 | 1.4391 | 12.0427 | N | 10.1340 | 1.4763 | 12.0449 |
| N | 11.0118 | 2.3465 | 9.9143  | N | 11.0858 | 2.3444 | 9.9179  |
| N | 11.5026 | 3.5325 | 12.0427 | N | 11.6135 | 3.5130 | 12.0479 |
| N | 8.2577  | 4.1735 | 7.3393  | N | 7.0977  | 4.0286 | 7.0065  |
| B | 11.4359 | 4.8030 | 2.8135  | B | 11.5351 | 4.7823 | 2.8116  |
| B | 10.9503 | 5.9611 | 0.6855  | B | 10.9760 | 5.9242 | 0.6932  |
| B | 10.0663 | 6.8539 | 2.8135  | B | 10.0464 | 6.7586 | 2.8234  |
| B | 8.9039  | 7.3288 | 0.6854  | B | 8.8786  | 7.2372 | 0.6923  |
| B | 7.6471  | 7.3355 | 2.8130  | B | 7.6085  | 7.2485 | 2.8176  |
| B | 6.4896  | 6.8486 | 0.6848  | B | 6.4437  | 6.8270 | 0.6839  |
| B | 5.5954  | 5.9658 | 2.8127  | B | 5.5099  | 5.9674 | 2.8075  |
| B | 5.1210  | 4.8025 | 0.6849  | B | 5.0410  | 4.8216 | 0.6689  |
| B | 5.1132  | 3.5461 | 2.8127  | B | 5.0463  | 3.5730 | 2.8089  |
| B | 5.6011  | 2.3881 | 0.6850  | B | 5.5759  | 2.4361 | 0.6702  |
| B | 6.4844  | 1.4948 | 2.8129  | B | 6.4661  | 1.5791 | 2.8082  |
| B | 7.6481  | 1.0206 | 0.6850  | B | 7.6566  | 1.1141 | 0.6882  |
| B | 8.9040  | 1.0140 | 2.8129  | B | 8.9059  | 1.1185 | 2.8221  |
| B | 10.0627 | 1.5004 | 0.6850  | B | 10.0929 | 1.5349 | 0.6925  |
| B | 10.9547 | 2.3842 | 2.8130  | B | 11.0398 | 2.3804 | 2.8149  |
| B | 11.4304 | 3.5469 | 0.6852  | B | 11.5312 | 3.5289 | 0.6917  |
| B | 11.3936 | 4.7945 | 7.0976  | B | 11.5963 | 4.7798 | 7.0870  |
| B | 10.9514 | 5.9618 | 4.9453  | B | 11.0100 | 5.8953 | 4.9429  |
| B | 10.0420 | 6.8174 | 7.0978  | B | 10.0263 | 6.7383 | 7.0933  |
| B | 8.9046  | 7.3308 | 4.9450  | B | 8.8393  | 7.1861 | 4.9467  |
| B | 7.6563  | 7.2914 | 7.0983  | B | 7.5800  | 7.2596 | 7.0839  |
| B | 6.4885  | 6.8515 | 4.9443  | B | 6.3964  | 6.8306 | 4.9460  |
| B | 5.6349  | 5.9403 | 7.0987  | B | 5.4832  | 6.0154 | 7.0867  |
| B | 5.1189  | 4.8036 | 4.9442  | B | 5.0270  | 4.8216 | 4.9489  |
| B | 5.1612  | 3.5560 | 7.0989  | B | 5.5652  | 3.6948 | 7.0697  |
| B | 5.6000  | 2.3869 | 4.9442  | B | 5.5458  | 2.4350 | 4.9487  |
| B | 6.5114  | 1.5344 | 7.0985  | B | 6.4497  | 1.5206 | 7.0877  |
| B | 7.6486  | 1.0184 | 4.9444  | B | 7.6103  | 1.1440 | 4.9434  |
| B | 8.8958  | 1.0577 | 7.0978  | B | 8.8746  | 1.1203 | 7.0931  |
| B | 10.0641 | 1.4991 | 4.9447  | B | 10.1022 | 1.5695 | 4.9445  |
| B | 10.9191 | 2.4082 | 7.0973  | B | 11.0783 | 2.3766 | 7.0907  |
| B | 11.4315 | 3.5467 | 4.9451  | B | 11.6283 | 3.5199 | 4.9367  |
| B | 11.4286 | 4.8014 | 11.3376 | B | 11.5118 | 4.7839 | 11.3525 |
| B | 10.9484 | 5.9600 | 9.2124  | B | 10.9671 | 5.9003 | 9.2273  |
| B | 10.0623 | 6.8470 | 11.3377 | B | 10.0440 | 6.7655 | 11.3437 |
| B | 8.9037  | 7.3271 | 9.2124  | B | 8.8612  | 7.2147 | 9.2154  |
| B | 7.6496  | 7.3269 | 11.3374 | B | 7.6207  | 7.2636 | 11.3383 |
| B | 6.4904  | 6.8481 | 9.2124  | B | 6.4127  | 6.8575 | 9.2051  |



## SUPPORTING INFORMATION

|                                                                                                                                                                                                                                                                                                                                                                                                                                                                                                                                                                                                                                                                                                                                                                                                                                                                                                                                                                                                                                                                                                                                                                                                                                                                                                                                                                                                                                                                                                                                                                                                                                                                                                                                                                                                                                                                                                                                                                                                                                                                                                            |                                           |         |         |         |   |         |        |        |   |         |        |         |   |        |        |        |   |         |        |         |   |        |        |        |   |        |        |         |   |         |        |        |   |         |        |         |   |         |        |        |    |        |        |        |                                                                                                                                                                                                                                                                                                                                                                                                                                                                                                                                                                                                                                                                                                                                                                                                                      |        |        |        |         |        |        |        |        |         |        |        |         |        |        |        |        |         |        |        |         |         |        |        |        |         |        |        |         |         |         |        |        |         |         |        |         |         |         |        |        |        |        |        |        |         |        |        |   |        |        |        |   |        |        |        |   |        |        |        |   |        |        |        |   |        |        |        |   |        |        |        |   |        |        |        |                                                                                                                                                                                                                                                                                                                                                                                                                                                                                                                                                                                                                                                                                                                                                                                                                                                                                                                                                                                                                                                                                                                                                                                                                                                                                                                                                                                                                                                                                                                                                                                                                                                                                                                                                                                                                                                                                                                                                                                                                                                                                                            |   |         |        |        |   |         |        |        |   |         |        |        |   |        |        |        |   |         |        |        |   |        |        |        |   |        |        |        |   |        |        |        |   |        |        |        |   |        |        |        |   |        |        |        |   |        |        |        |   |        |        |        |   |         |        |        |   |        |        |        |   |         |        |        |   |         |        |        |   |         |        |        |   |         |        |        |   |         |        |        |   |         |        |        |   |        |        |        |   |         |        |        |   |        |        |        |   |        |        |        |   |        |        |        |   |        |        |        |   |        |        |        |   |        |        |        |   |        |        |        |
|------------------------------------------------------------------------------------------------------------------------------------------------------------------------------------------------------------------------------------------------------------------------------------------------------------------------------------------------------------------------------------------------------------------------------------------------------------------------------------------------------------------------------------------------------------------------------------------------------------------------------------------------------------------------------------------------------------------------------------------------------------------------------------------------------------------------------------------------------------------------------------------------------------------------------------------------------------------------------------------------------------------------------------------------------------------------------------------------------------------------------------------------------------------------------------------------------------------------------------------------------------------------------------------------------------------------------------------------------------------------------------------------------------------------------------------------------------------------------------------------------------------------------------------------------------------------------------------------------------------------------------------------------------------------------------------------------------------------------------------------------------------------------------------------------------------------------------------------------------------------------------------------------------------------------------------------------------------------------------------------------------------------------------------------------------------------------------------------------------|-------------------------------------------|---------|---------|---------|---|---------|--------|--------|---|---------|--------|---------|---|--------|--------|--------|---|---------|--------|---------|---|--------|--------|--------|---|--------|--------|---------|---|---------|--------|--------|---|---------|--------|---------|---|---------|--------|--------|----|--------|--------|--------|----------------------------------------------------------------------------------------------------------------------------------------------------------------------------------------------------------------------------------------------------------------------------------------------------------------------------------------------------------------------------------------------------------------------------------------------------------------------------------------------------------------------------------------------------------------------------------------------------------------------------------------------------------------------------------------------------------------------------------------------------------------------------------------------------------------------|--------|--------|--------|---------|--------|--------|--------|--------|---------|--------|--------|---------|--------|--------|--------|--------|---------|--------|--------|---------|---------|--------|--------|--------|---------|--------|--------|---------|---------|---------|--------|--------|---------|---------|--------|---------|---------|---------|--------|--------|--------|--------|--------|--------|---------|--------|--------|---|--------|--------|--------|---|--------|--------|--------|---|--------|--------|--------|---|--------|--------|--------|---|--------|--------|--------|---|--------|--------|--------|---|--------|--------|--------|------------------------------------------------------------------------------------------------------------------------------------------------------------------------------------------------------------------------------------------------------------------------------------------------------------------------------------------------------------------------------------------------------------------------------------------------------------------------------------------------------------------------------------------------------------------------------------------------------------------------------------------------------------------------------------------------------------------------------------------------------------------------------------------------------------------------------------------------------------------------------------------------------------------------------------------------------------------------------------------------------------------------------------------------------------------------------------------------------------------------------------------------------------------------------------------------------------------------------------------------------------------------------------------------------------------------------------------------------------------------------------------------------------------------------------------------------------------------------------------------------------------------------------------------------------------------------------------------------------------------------------------------------------------------------------------------------------------------------------------------------------------------------------------------------------------------------------------------------------------------------------------------------------------------------------------------------------------------------------------------------------------------------------------------------------------------------------------------------------|---|---------|--------|--------|---|---------|--------|--------|---|---------|--------|--------|---|--------|--------|--------|---|---------|--------|--------|---|--------|--------|--------|---|--------|--------|--------|---|--------|--------|--------|---|--------|--------|--------|---|--------|--------|--------|---|--------|--------|--------|---|--------|--------|--------|---|--------|--------|--------|---|---------|--------|--------|---|--------|--------|--------|---|---------|--------|--------|---|---------|--------|--------|---|---------|--------|--------|---|---------|--------|--------|---|---------|--------|--------|---|---------|--------|--------|---|--------|--------|--------|---|---------|--------|--------|---|--------|--------|--------|---|--------|--------|--------|---|--------|--------|--------|---|--------|--------|--------|---|--------|--------|--------|---|--------|--------|--------|---|--------|--------|--------|
| <table style="width: 100%; border-collapse: collapse;"> <tr><td>B</td><td>5.6037</td><td>5.9608</td><td>11.3373</td></tr> <tr><td>B</td><td>5.1228</td><td>4.8027</td><td>9.2124</td></tr> <tr><td>B</td><td>5.1233</td><td>3.5481</td><td>11.3374</td></tr> <tr><td>B</td><td>5.6032</td><td>2.3896</td><td>9.2124</td></tr> <tr><td>B</td><td>6.4903</td><td>1.5029</td><td>11.3374</td></tr> <tr><td>B</td><td>7.6488</td><td>1.0226</td><td>9.2122</td></tr> <tr><td>B</td><td>8.9029</td><td>1.0225</td><td>11.3373</td></tr> <tr><td>B</td><td>10.0617</td><td>1.5019</td><td>9.2120</td></tr> <tr><td>B</td><td>10.9487</td><td>2.3886</td><td>11.3372</td></tr> <tr><td>B</td><td>11.4281</td><td>3.5473</td><td>9.2122</td></tr> <tr><td>Dy</td><td>8.2454</td><td>4.1736</td><td>5.4630</td></tr> </table>                                                                                                                                                                                                                                                                                                                                                                                                                                                                                                                                                                                                                                                                                                                                                                                                                                                                                                                                                                                                                                                                                                                                                                                                                                                                                       | B                                         | 5.6037  | 5.9608  | 11.3373 | B | 5.1228  | 4.8027 | 9.2124 | B | 5.1233  | 3.5481 | 11.3374 | B | 5.6032 | 2.3896 | 9.2124 | B | 6.4903  | 1.5029 | 11.3374 | B | 7.6488 | 1.0226 | 9.2122 | B | 8.9029 | 1.0225 | 11.3373 | B | 10.0617 | 1.5019 | 9.2120 | B | 10.9487 | 2.3886 | 11.3372 | B | 11.4281 | 3.5473 | 9.2122 | Dy | 8.2454 | 4.1736 | 5.4630 | <table style="width: 100%; border-collapse: collapse;"> <tr><td>B</td><td>5.5254</td><td>5.9844</td><td>11.3266</td></tr> <tr><td>B</td><td>5.0083</td><td>4.8474</td><td>9.1784</td></tr> <tr><td>B</td><td>5.0809</td><td>3.5773</td><td>11.3051</td></tr> <tr><td>B</td><td>5.5569</td><td>2.4012</td><td>9.1819</td></tr> <tr><td>B</td><td>6.4882</td><td>1.5589</td><td>11.3297</td></tr> <tr><td>B</td><td>7.6354</td><td>1.0729</td><td>9.2094</td></tr> <tr><td>B</td><td>8.9128</td><td>1.0966</td><td>11.3408</td></tr> <tr><td>B</td><td>10.0697</td><td>1.5721</td><td>9.2245</td></tr> <tr><td>B</td><td>11.0191</td><td>2.3833</td><td>11.3494</td></tr> <tr><td>B</td><td>11.5576</td><td>3.5275</td><td>9.2307</td></tr> <tr><td>Dy</td><td>8.9196</td><td>4.0638</td><td>6.4642</td></tr> </table> | B      | 5.5254 | 5.9844 | 11.3266 | B      | 5.0083 | 4.8474 | 9.1784 | B       | 5.0809 | 3.5773 | 11.3051 | B      | 5.5569 | 2.4012 | 9.1819 | B       | 6.4882 | 1.5589 | 11.3297 | B       | 7.6354 | 1.0729 | 9.2094 | B       | 8.9128 | 1.0966 | 11.3408 | B       | 10.0697 | 1.5721 | 9.2245 | B       | 11.0191 | 2.3833 | 11.3494 | B       | 11.5576 | 3.5275 | 9.2307 | Dy     | 8.9196 | 4.0638 | 6.4642 |         |        |        |   |        |        |        |   |        |        |        |   |        |        |        |   |        |        |        |   |        |        |        |   |        |        |        |   |        |        |        |                                                                                                                                                                                                                                                                                                                                                                                                                                                                                                                                                                                                                                                                                                                                                                                                                                                                                                                                                                                                                                                                                                                                                                                                                                                                                                                                                                                                                                                                                                                                                                                                                                                                                                                                                                                                                                                                                                                                                                                                                                                                                                            |   |         |        |        |   |         |        |        |   |         |        |        |   |        |        |        |   |         |        |        |   |        |        |        |   |        |        |        |   |        |        |        |   |        |        |        |   |        |        |        |   |        |        |        |   |        |        |        |   |        |        |        |   |         |        |        |   |        |        |        |   |         |        |        |   |         |        |        |   |         |        |        |   |         |        |        |   |         |        |        |   |         |        |        |   |        |        |        |   |         |        |        |   |        |        |        |   |        |        |        |   |        |        |        |   |        |        |        |   |        |        |        |   |        |        |        |   |        |        |        |
| B                                                                                                                                                                                                                                                                                                                                                                                                                                                                                                                                                                                                                                                                                                                                                                                                                                                                                                                                                                                                                                                                                                                                                                                                                                                                                                                                                                                                                                                                                                                                                                                                                                                                                                                                                                                                                                                                                                                                                                                                                                                                                                          | 5.6037                                    | 5.9608  | 11.3373 |         |   |         |        |        |   |         |        |         |   |        |        |        |   |         |        |         |   |        |        |        |   |        |        |         |   |         |        |        |   |         |        |         |   |         |        |        |    |        |        |        |                                                                                                                                                                                                                                                                                                                                                                                                                                                                                                                                                                                                                                                                                                                                                                                                                      |        |        |        |         |        |        |        |        |         |        |        |         |        |        |        |        |         |        |        |         |         |        |        |        |         |        |        |         |         |         |        |        |         |         |        |         |         |         |        |        |        |        |        |        |         |        |        |   |        |        |        |   |        |        |        |   |        |        |        |   |        |        |        |   |        |        |        |   |        |        |        |   |        |        |        |                                                                                                                                                                                                                                                                                                                                                                                                                                                                                                                                                                                                                                                                                                                                                                                                                                                                                                                                                                                                                                                                                                                                                                                                                                                                                                                                                                                                                                                                                                                                                                                                                                                                                                                                                                                                                                                                                                                                                                                                                                                                                                            |   |         |        |        |   |         |        |        |   |         |        |        |   |        |        |        |   |         |        |        |   |        |        |        |   |        |        |        |   |        |        |        |   |        |        |        |   |        |        |        |   |        |        |        |   |        |        |        |   |        |        |        |   |         |        |        |   |        |        |        |   |         |        |        |   |         |        |        |   |         |        |        |   |         |        |        |   |         |        |        |   |         |        |        |   |        |        |        |   |         |        |        |   |        |        |        |   |        |        |        |   |        |        |        |   |        |        |        |   |        |        |        |   |        |        |        |   |        |        |        |
| B                                                                                                                                                                                                                                                                                                                                                                                                                                                                                                                                                                                                                                                                                                                                                                                                                                                                                                                                                                                                                                                                                                                                                                                                                                                                                                                                                                                                                                                                                                                                                                                                                                                                                                                                                                                                                                                                                                                                                                                                                                                                                                          | 5.1228                                    | 4.8027  | 9.2124  |         |   |         |        |        |   |         |        |         |   |        |        |        |   |         |        |         |   |        |        |        |   |        |        |         |   |         |        |        |   |         |        |         |   |         |        |        |    |        |        |        |                                                                                                                                                                                                                                                                                                                                                                                                                                                                                                                                                                                                                                                                                                                                                                                                                      |        |        |        |         |        |        |        |        |         |        |        |         |        |        |        |        |         |        |        |         |         |        |        |        |         |        |        |         |         |         |        |        |         |         |        |         |         |         |        |        |        |        |        |        |         |        |        |   |        |        |        |   |        |        |        |   |        |        |        |   |        |        |        |   |        |        |        |   |        |        |        |   |        |        |        |                                                                                                                                                                                                                                                                                                                                                                                                                                                                                                                                                                                                                                                                                                                                                                                                                                                                                                                                                                                                                                                                                                                                                                                                                                                                                                                                                                                                                                                                                                                                                                                                                                                                                                                                                                                                                                                                                                                                                                                                                                                                                                            |   |         |        |        |   |         |        |        |   |         |        |        |   |        |        |        |   |         |        |        |   |        |        |        |   |        |        |        |   |        |        |        |   |        |        |        |   |        |        |        |   |        |        |        |   |        |        |        |   |        |        |        |   |         |        |        |   |        |        |        |   |         |        |        |   |         |        |        |   |         |        |        |   |         |        |        |   |         |        |        |   |         |        |        |   |        |        |        |   |         |        |        |   |        |        |        |   |        |        |        |   |        |        |        |   |        |        |        |   |        |        |        |   |        |        |        |   |        |        |        |
| B                                                                                                                                                                                                                                                                                                                                                                                                                                                                                                                                                                                                                                                                                                                                                                                                                                                                                                                                                                                                                                                                                                                                                                                                                                                                                                                                                                                                                                                                                                                                                                                                                                                                                                                                                                                                                                                                                                                                                                                                                                                                                                          | 5.1233                                    | 3.5481  | 11.3374 |         |   |         |        |        |   |         |        |         |   |        |        |        |   |         |        |         |   |        |        |        |   |        |        |         |   |         |        |        |   |         |        |         |   |         |        |        |    |        |        |        |                                                                                                                                                                                                                                                                                                                                                                                                                                                                                                                                                                                                                                                                                                                                                                                                                      |        |        |        |         |        |        |        |        |         |        |        |         |        |        |        |        |         |        |        |         |         |        |        |        |         |        |        |         |         |         |        |        |         |         |        |         |         |         |        |        |        |        |        |        |         |        |        |   |        |        |        |   |        |        |        |   |        |        |        |   |        |        |        |   |        |        |        |   |        |        |        |   |        |        |        |                                                                                                                                                                                                                                                                                                                                                                                                                                                                                                                                                                                                                                                                                                                                                                                                                                                                                                                                                                                                                                                                                                                                                                                                                                                                                                                                                                                                                                                                                                                                                                                                                                                                                                                                                                                                                                                                                                                                                                                                                                                                                                            |   |         |        |        |   |         |        |        |   |         |        |        |   |        |        |        |   |         |        |        |   |        |        |        |   |        |        |        |   |        |        |        |   |        |        |        |   |        |        |        |   |        |        |        |   |        |        |        |   |        |        |        |   |         |        |        |   |        |        |        |   |         |        |        |   |         |        |        |   |         |        |        |   |         |        |        |   |         |        |        |   |         |        |        |   |        |        |        |   |         |        |        |   |        |        |        |   |        |        |        |   |        |        |        |   |        |        |        |   |        |        |        |   |        |        |        |   |        |        |        |
| B                                                                                                                                                                                                                                                                                                                                                                                                                                                                                                                                                                                                                                                                                                                                                                                                                                                                                                                                                                                                                                                                                                                                                                                                                                                                                                                                                                                                                                                                                                                                                                                                                                                                                                                                                                                                                                                                                                                                                                                                                                                                                                          | 5.6032                                    | 2.3896  | 9.2124  |         |   |         |        |        |   |         |        |         |   |        |        |        |   |         |        |         |   |        |        |        |   |        |        |         |   |         |        |        |   |         |        |         |   |         |        |        |    |        |        |        |                                                                                                                                                                                                                                                                                                                                                                                                                                                                                                                                                                                                                                                                                                                                                                                                                      |        |        |        |         |        |        |        |        |         |        |        |         |        |        |        |        |         |        |        |         |         |        |        |        |         |        |        |         |         |         |        |        |         |         |        |         |         |         |        |        |        |        |        |        |         |        |        |   |        |        |        |   |        |        |        |   |        |        |        |   |        |        |        |   |        |        |        |   |        |        |        |   |        |        |        |                                                                                                                                                                                                                                                                                                                                                                                                                                                                                                                                                                                                                                                                                                                                                                                                                                                                                                                                                                                                                                                                                                                                                                                                                                                                                                                                                                                                                                                                                                                                                                                                                                                                                                                                                                                                                                                                                                                                                                                                                                                                                                            |   |         |        |        |   |         |        |        |   |         |        |        |   |        |        |        |   |         |        |        |   |        |        |        |   |        |        |        |   |        |        |        |   |        |        |        |   |        |        |        |   |        |        |        |   |        |        |        |   |        |        |        |   |         |        |        |   |        |        |        |   |         |        |        |   |         |        |        |   |         |        |        |   |         |        |        |   |         |        |        |   |         |        |        |   |        |        |        |   |         |        |        |   |        |        |        |   |        |        |        |   |        |        |        |   |        |        |        |   |        |        |        |   |        |        |        |   |        |        |        |
| B                                                                                                                                                                                                                                                                                                                                                                                                                                                                                                                                                                                                                                                                                                                                                                                                                                                                                                                                                                                                                                                                                                                                                                                                                                                                                                                                                                                                                                                                                                                                                                                                                                                                                                                                                                                                                                                                                                                                                                                                                                                                                                          | 6.4903                                    | 1.5029  | 11.3374 |         |   |         |        |        |   |         |        |         |   |        |        |        |   |         |        |         |   |        |        |        |   |        |        |         |   |         |        |        |   |         |        |         |   |         |        |        |    |        |        |        |                                                                                                                                                                                                                                                                                                                                                                                                                                                                                                                                                                                                                                                                                                                                                                                                                      |        |        |        |         |        |        |        |        |         |        |        |         |        |        |        |        |         |        |        |         |         |        |        |        |         |        |        |         |         |         |        |        |         |         |        |         |         |         |        |        |        |        |        |        |         |        |        |   |        |        |        |   |        |        |        |   |        |        |        |   |        |        |        |   |        |        |        |   |        |        |        |   |        |        |        |                                                                                                                                                                                                                                                                                                                                                                                                                                                                                                                                                                                                                                                                                                                                                                                                                                                                                                                                                                                                                                                                                                                                                                                                                                                                                                                                                                                                                                                                                                                                                                                                                                                                                                                                                                                                                                                                                                                                                                                                                                                                                                            |   |         |        |        |   |         |        |        |   |         |        |        |   |        |        |        |   |         |        |        |   |        |        |        |   |        |        |        |   |        |        |        |   |        |        |        |   |        |        |        |   |        |        |        |   |        |        |        |   |        |        |        |   |         |        |        |   |        |        |        |   |         |        |        |   |         |        |        |   |         |        |        |   |         |        |        |   |         |        |        |   |         |        |        |   |        |        |        |   |         |        |        |   |        |        |        |   |        |        |        |   |        |        |        |   |        |        |        |   |        |        |        |   |        |        |        |   |        |        |        |
| B                                                                                                                                                                                                                                                                                                                                                                                                                                                                                                                                                                                                                                                                                                                                                                                                                                                                                                                                                                                                                                                                                                                                                                                                                                                                                                                                                                                                                                                                                                                                                                                                                                                                                                                                                                                                                                                                                                                                                                                                                                                                                                          | 7.6488                                    | 1.0226  | 9.2122  |         |   |         |        |        |   |         |        |         |   |        |        |        |   |         |        |         |   |        |        |        |   |        |        |         |   |         |        |        |   |         |        |         |   |         |        |        |    |        |        |        |                                                                                                                                                                                                                                                                                                                                                                                                                                                                                                                                                                                                                                                                                                                                                                                                                      |        |        |        |         |        |        |        |        |         |        |        |         |        |        |        |        |         |        |        |         |         |        |        |        |         |        |        |         |         |         |        |        |         |         |        |         |         |         |        |        |        |        |        |        |         |        |        |   |        |        |        |   |        |        |        |   |        |        |        |   |        |        |        |   |        |        |        |   |        |        |        |   |        |        |        |                                                                                                                                                                                                                                                                                                                                                                                                                                                                                                                                                                                                                                                                                                                                                                                                                                                                                                                                                                                                                                                                                                                                                                                                                                                                                                                                                                                                                                                                                                                                                                                                                                                                                                                                                                                                                                                                                                                                                                                                                                                                                                            |   |         |        |        |   |         |        |        |   |         |        |        |   |        |        |        |   |         |        |        |   |        |        |        |   |        |        |        |   |        |        |        |   |        |        |        |   |        |        |        |   |        |        |        |   |        |        |        |   |        |        |        |   |         |        |        |   |        |        |        |   |         |        |        |   |         |        |        |   |         |        |        |   |         |        |        |   |         |        |        |   |         |        |        |   |        |        |        |   |         |        |        |   |        |        |        |   |        |        |        |   |        |        |        |   |        |        |        |   |        |        |        |   |        |        |        |   |        |        |        |
| B                                                                                                                                                                                                                                                                                                                                                                                                                                                                                                                                                                                                                                                                                                                                                                                                                                                                                                                                                                                                                                                                                                                                                                                                                                                                                                                                                                                                                                                                                                                                                                                                                                                                                                                                                                                                                                                                                                                                                                                                                                                                                                          | 8.9029                                    | 1.0225  | 11.3373 |         |   |         |        |        |   |         |        |         |   |        |        |        |   |         |        |         |   |        |        |        |   |        |        |         |   |         |        |        |   |         |        |         |   |         |        |        |    |        |        |        |                                                                                                                                                                                                                                                                                                                                                                                                                                                                                                                                                                                                                                                                                                                                                                                                                      |        |        |        |         |        |        |        |        |         |        |        |         |        |        |        |        |         |        |        |         |         |        |        |        |         |        |        |         |         |         |        |        |         |         |        |         |         |         |        |        |        |        |        |        |         |        |        |   |        |        |        |   |        |        |        |   |        |        |        |   |        |        |        |   |        |        |        |   |        |        |        |   |        |        |        |                                                                                                                                                                                                                                                                                                                                                                                                                                                                                                                                                                                                                                                                                                                                                                                                                                                                                                                                                                                                                                                                                                                                                                                                                                                                                                                                                                                                                                                                                                                                                                                                                                                                                                                                                                                                                                                                                                                                                                                                                                                                                                            |   |         |        |        |   |         |        |        |   |         |        |        |   |        |        |        |   |         |        |        |   |        |        |        |   |        |        |        |   |        |        |        |   |        |        |        |   |        |        |        |   |        |        |        |   |        |        |        |   |        |        |        |   |         |        |        |   |        |        |        |   |         |        |        |   |         |        |        |   |         |        |        |   |         |        |        |   |         |        |        |   |         |        |        |   |        |        |        |   |         |        |        |   |        |        |        |   |        |        |        |   |        |        |        |   |        |        |        |   |        |        |        |   |        |        |        |   |        |        |        |
| B                                                                                                                                                                                                                                                                                                                                                                                                                                                                                                                                                                                                                                                                                                                                                                                                                                                                                                                                                                                                                                                                                                                                                                                                                                                                                                                                                                                                                                                                                                                                                                                                                                                                                                                                                                                                                                                                                                                                                                                                                                                                                                          | 10.0617                                   | 1.5019  | 9.2120  |         |   |         |        |        |   |         |        |         |   |        |        |        |   |         |        |         |   |        |        |        |   |        |        |         |   |         |        |        |   |         |        |         |   |         |        |        |    |        |        |        |                                                                                                                                                                                                                                                                                                                                                                                                                                                                                                                                                                                                                                                                                                                                                                                                                      |        |        |        |         |        |        |        |        |         |        |        |         |        |        |        |        |         |        |        |         |         |        |        |        |         |        |        |         |         |         |        |        |         |         |        |         |         |         |        |        |        |        |        |        |         |        |        |   |        |        |        |   |        |        |        |   |        |        |        |   |        |        |        |   |        |        |        |   |        |        |        |   |        |        |        |                                                                                                                                                                                                                                                                                                                                                                                                                                                                                                                                                                                                                                                                                                                                                                                                                                                                                                                                                                                                                                                                                                                                                                                                                                                                                                                                                                                                                                                                                                                                                                                                                                                                                                                                                                                                                                                                                                                                                                                                                                                                                                            |   |         |        |        |   |         |        |        |   |         |        |        |   |        |        |        |   |         |        |        |   |        |        |        |   |        |        |        |   |        |        |        |   |        |        |        |   |        |        |        |   |        |        |        |   |        |        |        |   |        |        |        |   |         |        |        |   |        |        |        |   |         |        |        |   |         |        |        |   |         |        |        |   |         |        |        |   |         |        |        |   |         |        |        |   |        |        |        |   |         |        |        |   |        |        |        |   |        |        |        |   |        |        |        |   |        |        |        |   |        |        |        |   |        |        |        |   |        |        |        |
| B                                                                                                                                                                                                                                                                                                                                                                                                                                                                                                                                                                                                                                                                                                                                                                                                                                                                                                                                                                                                                                                                                                                                                                                                                                                                                                                                                                                                                                                                                                                                                                                                                                                                                                                                                                                                                                                                                                                                                                                                                                                                                                          | 10.9487                                   | 2.3886  | 11.3372 |         |   |         |        |        |   |         |        |         |   |        |        |        |   |         |        |         |   |        |        |        |   |        |        |         |   |         |        |        |   |         |        |         |   |         |        |        |    |        |        |        |                                                                                                                                                                                                                                                                                                                                                                                                                                                                                                                                                                                                                                                                                                                                                                                                                      |        |        |        |         |        |        |        |        |         |        |        |         |        |        |        |        |         |        |        |         |         |        |        |        |         |        |        |         |         |         |        |        |         |         |        |         |         |         |        |        |        |        |        |        |         |        |        |   |        |        |        |   |        |        |        |   |        |        |        |   |        |        |        |   |        |        |        |   |        |        |        |   |        |        |        |                                                                                                                                                                                                                                                                                                                                                                                                                                                                                                                                                                                                                                                                                                                                                                                                                                                                                                                                                                                                                                                                                                                                                                                                                                                                                                                                                                                                                                                                                                                                                                                                                                                                                                                                                                                                                                                                                                                                                                                                                                                                                                            |   |         |        |        |   |         |        |        |   |         |        |        |   |        |        |        |   |         |        |        |   |        |        |        |   |        |        |        |   |        |        |        |   |        |        |        |   |        |        |        |   |        |        |        |   |        |        |        |   |        |        |        |   |         |        |        |   |        |        |        |   |         |        |        |   |         |        |        |   |         |        |        |   |         |        |        |   |         |        |        |   |         |        |        |   |        |        |        |   |         |        |        |   |        |        |        |   |        |        |        |   |        |        |        |   |        |        |        |   |        |        |        |   |        |        |        |   |        |        |        |
| B                                                                                                                                                                                                                                                                                                                                                                                                                                                                                                                                                                                                                                                                                                                                                                                                                                                                                                                                                                                                                                                                                                                                                                                                                                                                                                                                                                                                                                                                                                                                                                                                                                                                                                                                                                                                                                                                                                                                                                                                                                                                                                          | 11.4281                                   | 3.5473  | 9.2122  |         |   |         |        |        |   |         |        |         |   |        |        |        |   |         |        |         |   |        |        |        |   |        |        |         |   |         |        |        |   |         |        |         |   |         |        |        |    |        |        |        |                                                                                                                                                                                                                                                                                                                                                                                                                                                                                                                                                                                                                                                                                                                                                                                                                      |        |        |        |         |        |        |        |        |         |        |        |         |        |        |        |        |         |        |        |         |         |        |        |        |         |        |        |         |         |         |        |        |         |         |        |         |         |         |        |        |        |        |        |        |         |        |        |   |        |        |        |   |        |        |        |   |        |        |        |   |        |        |        |   |        |        |        |   |        |        |        |   |        |        |        |                                                                                                                                                                                                                                                                                                                                                                                                                                                                                                                                                                                                                                                                                                                                                                                                                                                                                                                                                                                                                                                                                                                                                                                                                                                                                                                                                                                                                                                                                                                                                                                                                                                                                                                                                                                                                                                                                                                                                                                                                                                                                                            |   |         |        |        |   |         |        |        |   |         |        |        |   |        |        |        |   |         |        |        |   |        |        |        |   |        |        |        |   |        |        |        |   |        |        |        |   |        |        |        |   |        |        |        |   |        |        |        |   |        |        |        |   |         |        |        |   |        |        |        |   |         |        |        |   |         |        |        |   |         |        |        |   |         |        |        |   |         |        |        |   |         |        |        |   |        |        |        |   |         |        |        |   |        |        |        |   |        |        |        |   |        |        |        |   |        |        |        |   |        |        |        |   |        |        |        |   |        |        |        |
| Dy                                                                                                                                                                                                                                                                                                                                                                                                                                                                                                                                                                                                                                                                                                                                                                                                                                                                                                                                                                                                                                                                                                                                                                                                                                                                                                                                                                                                                                                                                                                                                                                                                                                                                                                                                                                                                                                                                                                                                                                                                                                                                                         | 8.2454                                    | 4.1736  | 5.4630  |         |   |         |        |        |   |         |        |         |   |        |        |        |   |         |        |         |   |        |        |        |   |        |        |         |   |         |        |        |   |         |        |         |   |         |        |        |    |        |        |        |                                                                                                                                                                                                                                                                                                                                                                                                                                                                                                                                                                                                                                                                                                                                                                                                                      |        |        |        |         |        |        |        |        |         |        |        |         |        |        |        |        |         |        |        |         |         |        |        |        |         |        |        |         |         |         |        |        |         |         |        |         |         |         |        |        |        |        |        |        |         |        |        |   |        |        |        |   |        |        |        |   |        |        |        |   |        |        |        |   |        |        |        |   |        |        |        |   |        |        |        |                                                                                                                                                                                                                                                                                                                                                                                                                                                                                                                                                                                                                                                                                                                                                                                                                                                                                                                                                                                                                                                                                                                                                                                                                                                                                                                                                                                                                                                                                                                                                                                                                                                                                                                                                                                                                                                                                                                                                                                                                                                                                                            |   |         |        |        |   |         |        |        |   |         |        |        |   |        |        |        |   |         |        |        |   |        |        |        |   |        |        |        |   |        |        |        |   |        |        |        |   |        |        |        |   |        |        |        |   |        |        |        |   |        |        |        |   |         |        |        |   |        |        |        |   |         |        |        |   |         |        |        |   |         |        |        |   |         |        |        |   |         |        |        |   |         |        |        |   |        |        |        |   |         |        |        |   |        |        |        |   |        |        |        |   |        |        |        |   |        |        |        |   |        |        |        |   |        |        |        |   |        |        |        |
| B                                                                                                                                                                                                                                                                                                                                                                                                                                                                                                                                                                                                                                                                                                                                                                                                                                                                                                                                                                                                                                                                                                                                                                                                                                                                                                                                                                                                                                                                                                                                                                                                                                                                                                                                                                                                                                                                                                                                                                                                                                                                                                          | 5.5254                                    | 5.9844  | 11.3266 |         |   |         |        |        |   |         |        |         |   |        |        |        |   |         |        |         |   |        |        |        |   |        |        |         |   |         |        |        |   |         |        |         |   |         |        |        |    |        |        |        |                                                                                                                                                                                                                                                                                                                                                                                                                                                                                                                                                                                                                                                                                                                                                                                                                      |        |        |        |         |        |        |        |        |         |        |        |         |        |        |        |        |         |        |        |         |         |        |        |        |         |        |        |         |         |         |        |        |         |         |        |         |         |         |        |        |        |        |        |        |         |        |        |   |        |        |        |   |        |        |        |   |        |        |        |   |        |        |        |   |        |        |        |   |        |        |        |   |        |        |        |                                                                                                                                                                                                                                                                                                                                                                                                                                                                                                                                                                                                                                                                                                                                                                                                                                                                                                                                                                                                                                                                                                                                                                                                                                                                                                                                                                                                                                                                                                                                                                                                                                                                                                                                                                                                                                                                                                                                                                                                                                                                                                            |   |         |        |        |   |         |        |        |   |         |        |        |   |        |        |        |   |         |        |        |   |        |        |        |   |        |        |        |   |        |        |        |   |        |        |        |   |        |        |        |   |        |        |        |   |        |        |        |   |        |        |        |   |         |        |        |   |        |        |        |   |         |        |        |   |         |        |        |   |         |        |        |   |         |        |        |   |         |        |        |   |         |        |        |   |        |        |        |   |         |        |        |   |        |        |        |   |        |        |        |   |        |        |        |   |        |        |        |   |        |        |        |   |        |        |        |   |        |        |        |
| B                                                                                                                                                                                                                                                                                                                                                                                                                                                                                                                                                                                                                                                                                                                                                                                                                                                                                                                                                                                                                                                                                                                                                                                                                                                                                                                                                                                                                                                                                                                                                                                                                                                                                                                                                                                                                                                                                                                                                                                                                                                                                                          | 5.0083                                    | 4.8474  | 9.1784  |         |   |         |        |        |   |         |        |         |   |        |        |        |   |         |        |         |   |        |        |        |   |        |        |         |   |         |        |        |   |         |        |         |   |         |        |        |    |        |        |        |                                                                                                                                                                                                                                                                                                                                                                                                                                                                                                                                                                                                                                                                                                                                                                                                                      |        |        |        |         |        |        |        |        |         |        |        |         |        |        |        |        |         |        |        |         |         |        |        |        |         |        |        |         |         |         |        |        |         |         |        |         |         |         |        |        |        |        |        |        |         |        |        |   |        |        |        |   |        |        |        |   |        |        |        |   |        |        |        |   |        |        |        |   |        |        |        |   |        |        |        |                                                                                                                                                                                                                                                                                                                                                                                                                                                                                                                                                                                                                                                                                                                                                                                                                                                                                                                                                                                                                                                                                                                                                                                                                                                                                                                                                                                                                                                                                                                                                                                                                                                                                                                                                                                                                                                                                                                                                                                                                                                                                                            |   |         |        |        |   |         |        |        |   |         |        |        |   |        |        |        |   |         |        |        |   |        |        |        |   |        |        |        |   |        |        |        |   |        |        |        |   |        |        |        |   |        |        |        |   |        |        |        |   |        |        |        |   |         |        |        |   |        |        |        |   |         |        |        |   |         |        |        |   |         |        |        |   |         |        |        |   |         |        |        |   |         |        |        |   |        |        |        |   |         |        |        |   |        |        |        |   |        |        |        |   |        |        |        |   |        |        |        |   |        |        |        |   |        |        |        |   |        |        |        |
| B                                                                                                                                                                                                                                                                                                                                                                                                                                                                                                                                                                                                                                                                                                                                                                                                                                                                                                                                                                                                                                                                                                                                                                                                                                                                                                                                                                                                                                                                                                                                                                                                                                                                                                                                                                                                                                                                                                                                                                                                                                                                                                          | 5.0809                                    | 3.5773  | 11.3051 |         |   |         |        |        |   |         |        |         |   |        |        |        |   |         |        |         |   |        |        |        |   |        |        |         |   |         |        |        |   |         |        |         |   |         |        |        |    |        |        |        |                                                                                                                                                                                                                                                                                                                                                                                                                                                                                                                                                                                                                                                                                                                                                                                                                      |        |        |        |         |        |        |        |        |         |        |        |         |        |        |        |        |         |        |        |         |         |        |        |        |         |        |        |         |         |         |        |        |         |         |        |         |         |         |        |        |        |        |        |        |         |        |        |   |        |        |        |   |        |        |        |   |        |        |        |   |        |        |        |   |        |        |        |   |        |        |        |   |        |        |        |                                                                                                                                                                                                                                                                                                                                                                                                                                                                                                                                                                                                                                                                                                                                                                                                                                                                                                                                                                                                                                                                                                                                                                                                                                                                                                                                                                                                                                                                                                                                                                                                                                                                                                                                                                                                                                                                                                                                                                                                                                                                                                            |   |         |        |        |   |         |        |        |   |         |        |        |   |        |        |        |   |         |        |        |   |        |        |        |   |        |        |        |   |        |        |        |   |        |        |        |   |        |        |        |   |        |        |        |   |        |        |        |   |        |        |        |   |         |        |        |   |        |        |        |   |         |        |        |   |         |        |        |   |         |        |        |   |         |        |        |   |         |        |        |   |         |        |        |   |        |        |        |   |         |        |        |   |        |        |        |   |        |        |        |   |        |        |        |   |        |        |        |   |        |        |        |   |        |        |        |   |        |        |        |
| B                                                                                                                                                                                                                                                                                                                                                                                                                                                                                                                                                                                                                                                                                                                                                                                                                                                                                                                                                                                                                                                                                                                                                                                                                                                                                                                                                                                                                                                                                                                                                                                                                                                                                                                                                                                                                                                                                                                                                                                                                                                                                                          | 5.5569                                    | 2.4012  | 9.1819  |         |   |         |        |        |   |         |        |         |   |        |        |        |   |         |        |         |   |        |        |        |   |        |        |         |   |         |        |        |   |         |        |         |   |         |        |        |    |        |        |        |                                                                                                                                                                                                                                                                                                                                                                                                                                                                                                                                                                                                                                                                                                                                                                                                                      |        |        |        |         |        |        |        |        |         |        |        |         |        |        |        |        |         |        |        |         |         |        |        |        |         |        |        |         |         |         |        |        |         |         |        |         |         |         |        |        |        |        |        |        |         |        |        |   |        |        |        |   |        |        |        |   |        |        |        |   |        |        |        |   |        |        |        |   |        |        |        |   |        |        |        |                                                                                                                                                                                                                                                                                                                                                                                                                                                                                                                                                                                                                                                                                                                                                                                                                                                                                                                                                                                                                                                                                                                                                                                                                                                                                                                                                                                                                                                                                                                                                                                                                                                                                                                                                                                                                                                                                                                                                                                                                                                                                                            |   |         |        |        |   |         |        |        |   |         |        |        |   |        |        |        |   |         |        |        |   |        |        |        |   |        |        |        |   |        |        |        |   |        |        |        |   |        |        |        |   |        |        |        |   |        |        |        |   |        |        |        |   |         |        |        |   |        |        |        |   |         |        |        |   |         |        |        |   |         |        |        |   |         |        |        |   |         |        |        |   |         |        |        |   |        |        |        |   |         |        |        |   |        |        |        |   |        |        |        |   |        |        |        |   |        |        |        |   |        |        |        |   |        |        |        |   |        |        |        |
| B                                                                                                                                                                                                                                                                                                                                                                                                                                                                                                                                                                                                                                                                                                                                                                                                                                                                                                                                                                                                                                                                                                                                                                                                                                                                                                                                                                                                                                                                                                                                                                                                                                                                                                                                                                                                                                                                                                                                                                                                                                                                                                          | 6.4882                                    | 1.5589  | 11.3297 |         |   |         |        |        |   |         |        |         |   |        |        |        |   |         |        |         |   |        |        |        |   |        |        |         |   |         |        |        |   |         |        |         |   |         |        |        |    |        |        |        |                                                                                                                                                                                                                                                                                                                                                                                                                                                                                                                                                                                                                                                                                                                                                                                                                      |        |        |        |         |        |        |        |        |         |        |        |         |        |        |        |        |         |        |        |         |         |        |        |        |         |        |        |         |         |         |        |        |         |         |        |         |         |         |        |        |        |        |        |        |         |        |        |   |        |        |        |   |        |        |        |   |        |        |        |   |        |        |        |   |        |        |        |   |        |        |        |   |        |        |        |                                                                                                                                                                                                                                                                                                                                                                                                                                                                                                                                                                                                                                                                                                                                                                                                                                                                                                                                                                                                                                                                                                                                                                                                                                                                                                                                                                                                                                                                                                                                                                                                                                                                                                                                                                                                                                                                                                                                                                                                                                                                                                            |   |         |        |        |   |         |        |        |   |         |        |        |   |        |        |        |   |         |        |        |   |        |        |        |   |        |        |        |   |        |        |        |   |        |        |        |   |        |        |        |   |        |        |        |   |        |        |        |   |        |        |        |   |         |        |        |   |        |        |        |   |         |        |        |   |         |        |        |   |         |        |        |   |         |        |        |   |         |        |        |   |         |        |        |   |        |        |        |   |         |        |        |   |        |        |        |   |        |        |        |   |        |        |        |   |        |        |        |   |        |        |        |   |        |        |        |   |        |        |        |
| B                                                                                                                                                                                                                                                                                                                                                                                                                                                                                                                                                                                                                                                                                                                                                                                                                                                                                                                                                                                                                                                                                                                                                                                                                                                                                                                                                                                                                                                                                                                                                                                                                                                                                                                                                                                                                                                                                                                                                                                                                                                                                                          | 7.6354                                    | 1.0729  | 9.2094  |         |   |         |        |        |   |         |        |         |   |        |        |        |   |         |        |         |   |        |        |        |   |        |        |         |   |         |        |        |   |         |        |         |   |         |        |        |    |        |        |        |                                                                                                                                                                                                                                                                                                                                                                                                                                                                                                                                                                                                                                                                                                                                                                                                                      |        |        |        |         |        |        |        |        |         |        |        |         |        |        |        |        |         |        |        |         |         |        |        |        |         |        |        |         |         |         |        |        |         |         |        |         |         |         |        |        |        |        |        |        |         |        |        |   |        |        |        |   |        |        |        |   |        |        |        |   |        |        |        |   |        |        |        |   |        |        |        |   |        |        |        |                                                                                                                                                                                                                                                                                                                                                                                                                                                                                                                                                                                                                                                                                                                                                                                                                                                                                                                                                                                                                                                                                                                                                                                                                                                                                                                                                                                                                                                                                                                                                                                                                                                                                                                                                                                                                                                                                                                                                                                                                                                                                                            |   |         |        |        |   |         |        |        |   |         |        |        |   |        |        |        |   |         |        |        |   |        |        |        |   |        |        |        |   |        |        |        |   |        |        |        |   |        |        |        |   |        |        |        |   |        |        |        |   |        |        |        |   |         |        |        |   |        |        |        |   |         |        |        |   |         |        |        |   |         |        |        |   |         |        |        |   |         |        |        |   |         |        |        |   |        |        |        |   |         |        |        |   |        |        |        |   |        |        |        |   |        |        |        |   |        |        |        |   |        |        |        |   |        |        |        |   |        |        |        |
| B                                                                                                                                                                                                                                                                                                                                                                                                                                                                                                                                                                                                                                                                                                                                                                                                                                                                                                                                                                                                                                                                                                                                                                                                                                                                                                                                                                                                                                                                                                                                                                                                                                                                                                                                                                                                                                                                                                                                                                                                                                                                                                          | 8.9128                                    | 1.0966  | 11.3408 |         |   |         |        |        |   |         |        |         |   |        |        |        |   |         |        |         |   |        |        |        |   |        |        |         |   |         |        |        |   |         |        |         |   |         |        |        |    |        |        |        |                                                                                                                                                                                                                                                                                                                                                                                                                                                                                                                                                                                                                                                                                                                                                                                                                      |        |        |        |         |        |        |        |        |         |        |        |         |        |        |        |        |         |        |        |         |         |        |        |        |         |        |        |         |         |         |        |        |         |         |        |         |         |         |        |        |        |        |        |        |         |        |        |   |        |        |        |   |        |        |        |   |        |        |        |   |        |        |        |   |        |        |        |   |        |        |        |   |        |        |        |                                                                                                                                                                                                                                                                                                                                                                                                                                                                                                                                                                                                                                                                                                                                                                                                                                                                                                                                                                                                                                                                                                                                                                                                                                                                                                                                                                                                                                                                                                                                                                                                                                                                                                                                                                                                                                                                                                                                                                                                                                                                                                            |   |         |        |        |   |         |        |        |   |         |        |        |   |        |        |        |   |         |        |        |   |        |        |        |   |        |        |        |   |        |        |        |   |        |        |        |   |        |        |        |   |        |        |        |   |        |        |        |   |        |        |        |   |         |        |        |   |        |        |        |   |         |        |        |   |         |        |        |   |         |        |        |   |         |        |        |   |         |        |        |   |         |        |        |   |        |        |        |   |         |        |        |   |        |        |        |   |        |        |        |   |        |        |        |   |        |        |        |   |        |        |        |   |        |        |        |   |        |        |        |
| B                                                                                                                                                                                                                                                                                                                                                                                                                                                                                                                                                                                                                                                                                                                                                                                                                                                                                                                                                                                                                                                                                                                                                                                                                                                                                                                                                                                                                                                                                                                                                                                                                                                                                                                                                                                                                                                                                                                                                                                                                                                                                                          | 10.0697                                   | 1.5721  | 9.2245  |         |   |         |        |        |   |         |        |         |   |        |        |        |   |         |        |         |   |        |        |        |   |        |        |         |   |         |        |        |   |         |        |         |   |         |        |        |    |        |        |        |                                                                                                                                                                                                                                                                                                                                                                                                                                                                                                                                                                                                                                                                                                                                                                                                                      |        |        |        |         |        |        |        |        |         |        |        |         |        |        |        |        |         |        |        |         |         |        |        |        |         |        |        |         |         |         |        |        |         |         |        |         |         |         |        |        |        |        |        |        |         |        |        |   |        |        |        |   |        |        |        |   |        |        |        |   |        |        |        |   |        |        |        |   |        |        |        |   |        |        |        |                                                                                                                                                                                                                                                                                                                                                                                                                                                                                                                                                                                                                                                                                                                                                                                                                                                                                                                                                                                                                                                                                                                                                                                                                                                                                                                                                                                                                                                                                                                                                                                                                                                                                                                                                                                                                                                                                                                                                                                                                                                                                                            |   |         |        |        |   |         |        |        |   |         |        |        |   |        |        |        |   |         |        |        |   |        |        |        |   |        |        |        |   |        |        |        |   |        |        |        |   |        |        |        |   |        |        |        |   |        |        |        |   |        |        |        |   |         |        |        |   |        |        |        |   |         |        |        |   |         |        |        |   |         |        |        |   |         |        |        |   |         |        |        |   |         |        |        |   |        |        |        |   |         |        |        |   |        |        |        |   |        |        |        |   |        |        |        |   |        |        |        |   |        |        |        |   |        |        |        |   |        |        |        |
| B                                                                                                                                                                                                                                                                                                                                                                                                                                                                                                                                                                                                                                                                                                                                                                                                                                                                                                                                                                                                                                                                                                                                                                                                                                                                                                                                                                                                                                                                                                                                                                                                                                                                                                                                                                                                                                                                                                                                                                                                                                                                                                          | 11.0191                                   | 2.3833  | 11.3494 |         |   |         |        |        |   |         |        |         |   |        |        |        |   |         |        |         |   |        |        |        |   |        |        |         |   |         |        |        |   |         |        |         |   |         |        |        |    |        |        |        |                                                                                                                                                                                                                                                                                                                                                                                                                                                                                                                                                                                                                                                                                                                                                                                                                      |        |        |        |         |        |        |        |        |         |        |        |         |        |        |        |        |         |        |        |         |         |        |        |        |         |        |        |         |         |         |        |        |         |         |        |         |         |         |        |        |        |        |        |        |         |        |        |   |        |        |        |   |        |        |        |   |        |        |        |   |        |        |        |   |        |        |        |   |        |        |        |   |        |        |        |                                                                                                                                                                                                                                                                                                                                                                                                                                                                                                                                                                                                                                                                                                                                                                                                                                                                                                                                                                                                                                                                                                                                                                                                                                                                                                                                                                                                                                                                                                                                                                                                                                                                                                                                                                                                                                                                                                                                                                                                                                                                                                            |   |         |        |        |   |         |        |        |   |         |        |        |   |        |        |        |   |         |        |        |   |        |        |        |   |        |        |        |   |        |        |        |   |        |        |        |   |        |        |        |   |        |        |        |   |        |        |        |   |        |        |        |   |         |        |        |   |        |        |        |   |         |        |        |   |         |        |        |   |         |        |        |   |         |        |        |   |         |        |        |   |         |        |        |   |        |        |        |   |         |        |        |   |        |        |        |   |        |        |        |   |        |        |        |   |        |        |        |   |        |        |        |   |        |        |        |   |        |        |        |
| B                                                                                                                                                                                                                                                                                                                                                                                                                                                                                                                                                                                                                                                                                                                                                                                                                                                                                                                                                                                                                                                                                                                                                                                                                                                                                                                                                                                                                                                                                                                                                                                                                                                                                                                                                                                                                                                                                                                                                                                                                                                                                                          | 11.5576                                   | 3.5275  | 9.2307  |         |   |         |        |        |   |         |        |         |   |        |        |        |   |         |        |         |   |        |        |        |   |        |        |         |   |         |        |        |   |         |        |         |   |         |        |        |    |        |        |        |                                                                                                                                                                                                                                                                                                                                                                                                                                                                                                                                                                                                                                                                                                                                                                                                                      |        |        |        |         |        |        |        |        |         |        |        |         |        |        |        |        |         |        |        |         |         |        |        |        |         |        |        |         |         |         |        |        |         |         |        |         |         |         |        |        |        |        |        |        |         |        |        |   |        |        |        |   |        |        |        |   |        |        |        |   |        |        |        |   |        |        |        |   |        |        |        |   |        |        |        |                                                                                                                                                                                                                                                                                                                                                                                                                                                                                                                                                                                                                                                                                                                                                                                                                                                                                                                                                                                                                                                                                                                                                                                                                                                                                                                                                                                                                                                                                                                                                                                                                                                                                                                                                                                                                                                                                                                                                                                                                                                                                                            |   |         |        |        |   |         |        |        |   |         |        |        |   |        |        |        |   |         |        |        |   |        |        |        |   |        |        |        |   |        |        |        |   |        |        |        |   |        |        |        |   |        |        |        |   |        |        |        |   |        |        |        |   |         |        |        |   |        |        |        |   |         |        |        |   |         |        |        |   |         |        |        |   |         |        |        |   |         |        |        |   |         |        |        |   |        |        |        |   |         |        |        |   |        |        |        |   |        |        |        |   |        |        |        |   |        |        |        |   |        |        |        |   |        |        |        |   |        |        |        |
| Dy                                                                                                                                                                                                                                                                                                                                                                                                                                                                                                                                                                                                                                                                                                                                                                                                                                                                                                                                                                                                                                                                                                                                                                                                                                                                                                                                                                                                                                                                                                                                                                                                                                                                                                                                                                                                                                                                                                                                                                                                                                                                                                         | 8.9196                                    | 4.0638  | 6.4642  |         |   |         |        |        |   |         |        |         |   |        |        |        |   |         |        |         |   |        |        |        |   |        |        |         |   |         |        |        |   |         |        |         |   |         |        |        |    |        |        |        |                                                                                                                                                                                                                                                                                                                                                                                                                                                                                                                                                                                                                                                                                                                                                                                                                      |        |        |        |         |        |        |        |        |         |        |        |         |        |        |        |        |         |        |        |         |         |        |        |        |         |        |        |         |         |         |        |        |         |         |        |         |         |         |        |        |        |        |        |        |         |        |        |   |        |        |        |   |        |        |        |   |        |        |        |   |        |        |        |   |        |        |        |   |        |        |        |   |        |        |        |                                                                                                                                                                                                                                                                                                                                                                                                                                                                                                                                                                                                                                                                                                                                                                                                                                                                                                                                                                                                                                                                                                                                                                                                                                                                                                                                                                                                                                                                                                                                                                                                                                                                                                                                                                                                                                                                                                                                                                                                                                                                                                            |   |         |        |        |   |         |        |        |   |         |        |        |   |        |        |        |   |         |        |        |   |        |        |        |   |        |        |        |   |        |        |        |   |        |        |        |   |        |        |        |   |        |        |        |   |        |        |        |   |        |        |        |   |         |        |        |   |        |        |        |   |         |        |        |   |         |        |        |   |         |        |        |   |         |        |        |   |         |        |        |   |         |        |        |   |        |        |        |   |         |        |        |   |        |        |        |   |        |        |        |   |        |        |        |   |        |        |        |   |        |        |        |   |        |        |        |   |        |        |        |
| <b><math>{}^9\text{Dy}_{\parallel}</math></b>                                                                                                                                                                                                                                                                                                                                                                                                                                                                                                                                                                                                                                                                                                                                                                                                                                                                                                                                                                                                                                                                                                                                                                                                                                                                                                                                                                                                                                                                                                                                                                                                                                                                                                                                                                                                                                                                                                                                                                                                                                                              | <b><math>{}^9\text{Dy}_{\perp}</math></b> |         |         |         |   |         |        |        |   |         |        |         |   |        |        |        |   |         |        |         |   |        |        |        |   |        |        |         |   |         |        |        |   |         |        |         |   |         |        |        |    |        |        |        |                                                                                                                                                                                                                                                                                                                                                                                                                                                                                                                                                                                                                                                                                                                                                                                                                      |        |        |        |         |        |        |        |        |         |        |        |         |        |        |        |        |         |        |        |         |         |        |        |        |         |        |        |         |         |         |        |        |         |         |        |         |         |         |        |        |        |        |        |        |         |        |        |   |        |        |        |   |        |        |        |   |        |        |        |   |        |        |        |   |        |        |        |   |        |        |        |   |        |        |        |                                                                                                                                                                                                                                                                                                                                                                                                                                                                                                                                                                                                                                                                                                                                                                                                                                                                                                                                                                                                                                                                                                                                                                                                                                                                                                                                                                                                                                                                                                                                                                                                                                                                                                                                                                                                                                                                                                                                                                                                                                                                                                            |   |         |        |        |   |         |        |        |   |         |        |        |   |        |        |        |   |         |        |        |   |        |        |        |   |        |        |        |   |        |        |        |   |        |        |        |   |        |        |        |   |        |        |        |   |        |        |        |   |        |        |        |   |         |        |        |   |        |        |        |   |         |        |        |   |         |        |        |   |         |        |        |   |         |        |        |   |         |        |        |   |         |        |        |   |        |        |        |   |         |        |        |   |        |        |        |   |        |        |        |   |        |        |        |   |        |        |        |   |        |        |        |   |        |        |        |   |        |        |        |
| <table style="width: 100%; border-collapse: collapse;"> <tr><td>B</td><td>12.3524</td><td>5.7330</td><td>0.6458</td></tr> <tr><td>B</td><td>11.1150</td><td>7.8703</td><td>0.6477</td></tr> <tr><td>B</td><td>11.9328</td><td>6.9083</td><td>2.7743</td></tr> <tr><td>B</td><td>8.7945</td><td>8.7157</td><td>0.6482</td></tr> <tr><td>B</td><td>10.0296</td><td>8.4955</td><td>2.7754</td></tr> <tr><td>B</td><td>6.4729</td><td>7.8711</td><td>0.6492</td></tr> <tr><td>B</td><td>7.5600</td><td>8.4978</td><td>2.7767</td></tr> <tr><td>B</td><td>5.2387</td><td>5.7325</td><td>0.6500</td></tr> <tr><td>B</td><td>5.6712</td><td>6.9095</td><td>2.7790</td></tr> <tr><td>B</td><td>5.6687</td><td>3.3003</td><td>0.6492</td></tr> <tr><td>B</td><td>5.2423</td><td>4.4784</td><td>2.7787</td></tr> <tr><td>B</td><td>7.5622</td><td>1.7138</td><td>0.6483</td></tr> <tr><td>B</td><td>6.4770</td><td>2.3418</td><td>2.7764</td></tr> <tr><td>B</td><td>10.0329</td><td>1.7166</td><td>0.6473</td></tr> <tr><td>B</td><td>8.8004</td><td>1.4990</td><td>2.7756</td></tr> <tr><td>B</td><td>11.9258</td><td>3.3017</td><td>0.6461</td></tr> <tr><td>B</td><td>11.1328</td><td>2.3369</td><td>2.7737</td></tr> <tr><td>B</td><td>12.3848</td><td>4.4736</td><td>2.7704</td></tr> <tr><td>B</td><td>12.3211</td><td>5.7321</td><td>4.8737</td></tr> <tr><td>B</td><td>11.0753</td><td>7.8595</td><td>4.8898</td></tr> <tr><td>B</td><td>11.9133</td><td>6.9060</td><td>7.0434</td></tr> <tr><td>B</td><td>8.7798</td><td>8.7231</td><td>4.8984</td></tr> <tr><td>B</td><td>10.0212</td><td>8.5111</td><td>7.0365</td></tr> <tr><td>B</td><td>6.4699</td><td>7.8727</td><td>4.9028</td></tr> <tr><td>B</td><td>7.5475</td><td>8.5163</td><td>7.0356</td></tr> <tr><td>B</td><td>5.2435</td><td>5.7320</td><td>4.9041</td></tr> <tr><td>B</td><td>5.6593</td><td>6.9153</td><td>7.0357</td></tr> <tr><td>B</td><td>5.6617</td><td>3.3007</td><td>4.9020</td></tr> <tr><td>B</td><td>5.2281</td><td>4.4775</td><td>7.0360</td></tr> <tr><td>B</td><td>7.5439</td><td>1.7183</td><td>4.8971</td></tr> </table> | B                                         | 12.3524 | 5.7330  | 0.6458  | B | 11.1150 | 7.8703 | 0.6477 | B | 11.9328 | 6.9083 | 2.7743  | B | 8.7945 | 8.7157 | 0.6482 | B | 10.0296 | 8.4955 | 2.7754  | B | 6.4729 | 7.8711 | 0.6492 | B | 7.5600 | 8.4978 | 2.7767  | B | 5.2387  | 5.7325 | 0.6500 | B | 5.6712  | 6.9095 | 2.7790  | B | 5.6687  | 3.3003 | 0.6492 | B  | 5.2423 | 4.4784 | 2.7787 | B                                                                                                                                                                                                                                                                                                                                                                                                                                                                                                                                                                                                                                                                                                                                                                                                                    | 7.5622 | 1.7138 | 0.6483 | B       | 6.4770 | 2.3418 | 2.7764 | B      | 10.0329 | 1.7166 | 0.6473 | B       | 8.8004 | 1.4990 | 2.7756 | B      | 11.9258 | 3.3017 | 0.6461 | B       | 11.1328 | 2.3369 | 2.7737 | B      | 12.3848 | 4.4736 | 2.7704 | B       | 12.3211 | 5.7321  | 4.8737 | B      | 11.0753 | 7.8595  | 4.8898 | B       | 11.9133 | 6.9060  | 7.0434 | B      | 8.7798 | 8.7231 | 4.8984 | B      | 10.0212 | 8.5111 | 7.0365 | B | 6.4699 | 7.8727 | 4.9028 | B | 7.5475 | 8.5163 | 7.0356 | B | 5.2435 | 5.7320 | 4.9041 | B | 5.6593 | 6.9153 | 7.0357 | B | 5.6617 | 3.3007 | 4.9020 | B | 5.2281 | 4.4775 | 7.0360 | B | 7.5439 | 1.7183 | 4.8971 | <table style="width: 100%; border-collapse: collapse;"> <tr><td>B</td><td>12.4001</td><td>5.7324</td><td>0.6456</td></tr> <tr><td>B</td><td>11.1420</td><td>7.8627</td><td>0.6429</td></tr> <tr><td>B</td><td>11.9775</td><td>6.9180</td><td>2.7646</td></tr> <tr><td>B</td><td>8.8066</td><td>8.6873</td><td>0.6417</td></tr> <tr><td>B</td><td>10.0464</td><td>8.4744</td><td>2.7725</td></tr> <tr><td>B</td><td>6.4790</td><td>7.8473</td><td>0.6377</td></tr> <tr><td>B</td><td>7.5657</td><td>8.4637</td><td>2.7702</td></tr> <tr><td>B</td><td>5.2410</td><td>5.7102</td><td>0.6344</td></tr> <tr><td>B</td><td>5.6703</td><td>6.8822</td><td>2.7677</td></tr> <tr><td>B</td><td>5.6579</td><td>3.2777</td><td>0.6348</td></tr> <tr><td>B</td><td>5.2337</td><td>4.4566</td><td>2.7673</td></tr> <tr><td>B</td><td>7.5526</td><td>1.6952</td><td>0.6389</td></tr> <tr><td>B</td><td>6.4615</td><td>2.3233</td><td>2.7688</td></tr> <tr><td>B</td><td>10.0262</td><td>1.7179</td><td>0.6417</td></tr> <tr><td>B</td><td>8.7847</td><td>1.4956</td><td>2.7704</td></tr> <tr><td>B</td><td>11.9316</td><td>3.3008</td><td>0.6434</td></tr> <tr><td>B</td><td>11.1119</td><td>2.3493</td><td>2.7736</td></tr> <tr><td>B</td><td>12.3922</td><td>4.4768</td><td>2.7669</td></tr> <tr><td>B</td><td>12.4496</td><td>5.7478</td><td>4.8832</td></tr> <tr><td>B</td><td>11.1586</td><td>7.8560</td><td>4.8944</td></tr> <tr><td>B</td><td>12.0249</td><td>6.9048</td><td>7.0364</td></tr> <tr><td>B</td><td>8.7906</td><td>8.6572</td><td>4.8991</td></tr> <tr><td>B</td><td>10.0370</td><td>8.4471</td><td>7.0369</td></tr> <tr><td>B</td><td>6.4667</td><td>7.8297</td><td>4.9003</td></tr> <tr><td>B</td><td>7.5558</td><td>8.4483</td><td>7.0267</td></tr> <tr><td>B</td><td>5.2271</td><td>5.7020</td><td>4.9018</td></tr> <tr><td>B</td><td>5.6775</td><td>6.8686</td><td>7.0230</td></tr> <tr><td>B</td><td>5.6468</td><td>3.2819</td><td>4.9021</td></tr> <tr><td>B</td><td>5.2713</td><td>4.4604</td><td>7.0199</td></tr> <tr><td>B</td><td>7.5364</td><td>1.7089</td><td>4.9025</td></tr> </table> | B | 12.4001 | 5.7324 | 0.6456 | B | 11.1420 | 7.8627 | 0.6429 | B | 11.9775 | 6.9180 | 2.7646 | B | 8.8066 | 8.6873 | 0.6417 | B | 10.0464 | 8.4744 | 2.7725 | B | 6.4790 | 7.8473 | 0.6377 | B | 7.5657 | 8.4637 | 2.7702 | B | 5.2410 | 5.7102 | 0.6344 | B | 5.6703 | 6.8822 | 2.7677 | B | 5.6579 | 3.2777 | 0.6348 | B | 5.2337 | 4.4566 | 2.7673 | B | 7.5526 | 1.6952 | 0.6389 | B | 6.4615 | 2.3233 | 2.7688 | B | 10.0262 | 1.7179 | 0.6417 | B | 8.7847 | 1.4956 | 2.7704 | B | 11.9316 | 3.3008 | 0.6434 | B | 11.1119 | 2.3493 | 2.7736 | B | 12.3922 | 4.4768 | 2.7669 | B | 12.4496 | 5.7478 | 4.8832 | B | 11.1586 | 7.8560 | 4.8944 | B | 12.0249 | 6.9048 | 7.0364 | B | 8.7906 | 8.6572 | 4.8991 | B | 10.0370 | 8.4471 | 7.0369 | B | 6.4667 | 7.8297 | 4.9003 | B | 7.5558 | 8.4483 | 7.0267 | B | 5.2271 | 5.7020 | 4.9018 | B | 5.6775 | 6.8686 | 7.0230 | B | 5.6468 | 3.2819 | 4.9021 | B | 5.2713 | 4.4604 | 7.0199 | B | 7.5364 | 1.7089 | 4.9025 |
| B                                                                                                                                                                                                                                                                                                                                                                                                                                                                                                                                                                                                                                                                                                                                                                                                                                                                                                                                                                                                                                                                                                                                                                                                                                                                                                                                                                                                                                                                                                                                                                                                                                                                                                                                                                                                                                                                                                                                                                                                                                                                                                          | 12.3524                                   | 5.7330  | 0.6458  |         |   |         |        |        |   |         |        |         |   |        |        |        |   |         |        |         |   |        |        |        |   |        |        |         |   |         |        |        |   |         |        |         |   |         |        |        |    |        |        |        |                                                                                                                                                                                                                                                                                                                                                                                                                                                                                                                                                                                                                                                                                                                                                                                                                      |        |        |        |         |        |        |        |        |         |        |        |         |        |        |        |        |         |        |        |         |         |        |        |        |         |        |        |         |         |         |        |        |         |         |        |         |         |         |        |        |        |        |        |        |         |        |        |   |        |        |        |   |        |        |        |   |        |        |        |   |        |        |        |   |        |        |        |   |        |        |        |   |        |        |        |                                                                                                                                                                                                                                                                                                                                                                                                                                                                                                                                                                                                                                                                                                                                                                                                                                                                                                                                                                                                                                                                                                                                                                                                                                                                                                                                                                                                                                                                                                                                                                                                                                                                                                                                                                                                                                                                                                                                                                                                                                                                                                            |   |         |        |        |   |         |        |        |   |         |        |        |   |        |        |        |   |         |        |        |   |        |        |        |   |        |        |        |   |        |        |        |   |        |        |        |   |        |        |        |   |        |        |        |   |        |        |        |   |        |        |        |   |         |        |        |   |        |        |        |   |         |        |        |   |         |        |        |   |         |        |        |   |         |        |        |   |         |        |        |   |         |        |        |   |        |        |        |   |         |        |        |   |        |        |        |   |        |        |        |   |        |        |        |   |        |        |        |   |        |        |        |   |        |        |        |   |        |        |        |
| B                                                                                                                                                                                                                                                                                                                                                                                                                                                                                                                                                                                                                                                                                                                                                                                                                                                                                                                                                                                                                                                                                                                                                                                                                                                                                                                                                                                                                                                                                                                                                                                                                                                                                                                                                                                                                                                                                                                                                                                                                                                                                                          | 11.1150                                   | 7.8703  | 0.6477  |         |   |         |        |        |   |         |        |         |   |        |        |        |   |         |        |         |   |        |        |        |   |        |        |         |   |         |        |        |   |         |        |         |   |         |        |        |    |        |        |        |                                                                                                                                                                                                                                                                                                                                                                                                                                                                                                                                                                                                                                                                                                                                                                                                                      |        |        |        |         |        |        |        |        |         |        |        |         |        |        |        |        |         |        |        |         |         |        |        |        |         |        |        |         |         |         |        |        |         |         |        |         |         |         |        |        |        |        |        |        |         |        |        |   |        |        |        |   |        |        |        |   |        |        |        |   |        |        |        |   |        |        |        |   |        |        |        |   |        |        |        |                                                                                                                                                                                                                                                                                                                                                                                                                                                                                                                                                                                                                                                                                                                                                                                                                                                                                                                                                                                                                                                                                                                                                                                                                                                                                                                                                                                                                                                                                                                                                                                                                                                                                                                                                                                                                                                                                                                                                                                                                                                                                                            |   |         |        |        |   |         |        |        |   |         |        |        |   |        |        |        |   |         |        |        |   |        |        |        |   |        |        |        |   |        |        |        |   |        |        |        |   |        |        |        |   |        |        |        |   |        |        |        |   |        |        |        |   |         |        |        |   |        |        |        |   |         |        |        |   |         |        |        |   |         |        |        |   |         |        |        |   |         |        |        |   |         |        |        |   |        |        |        |   |         |        |        |   |        |        |        |   |        |        |        |   |        |        |        |   |        |        |        |   |        |        |        |   |        |        |        |   |        |        |        |
| B                                                                                                                                                                                                                                                                                                                                                                                                                                                                                                                                                                                                                                                                                                                                                                                                                                                                                                                                                                                                                                                                                                                                                                                                                                                                                                                                                                                                                                                                                                                                                                                                                                                                                                                                                                                                                                                                                                                                                                                                                                                                                                          | 11.9328                                   | 6.9083  | 2.7743  |         |   |         |        |        |   |         |        |         |   |        |        |        |   |         |        |         |   |        |        |        |   |        |        |         |   |         |        |        |   |         |        |         |   |         |        |        |    |        |        |        |                                                                                                                                                                                                                                                                                                                                                                                                                                                                                                                                                                                                                                                                                                                                                                                                                      |        |        |        |         |        |        |        |        |         |        |        |         |        |        |        |        |         |        |        |         |         |        |        |        |         |        |        |         |         |         |        |        |         |         |        |         |         |         |        |        |        |        |        |        |         |        |        |   |        |        |        |   |        |        |        |   |        |        |        |   |        |        |        |   |        |        |        |   |        |        |        |   |        |        |        |                                                                                                                                                                                                                                                                                                                                                                                                                                                                                                                                                                                                                                                                                                                                                                                                                                                                                                                                                                                                                                                                                                                                                                                                                                                                                                                                                                                                                                                                                                                                                                                                                                                                                                                                                                                                                                                                                                                                                                                                                                                                                                            |   |         |        |        |   |         |        |        |   |         |        |        |   |        |        |        |   |         |        |        |   |        |        |        |   |        |        |        |   |        |        |        |   |        |        |        |   |        |        |        |   |        |        |        |   |        |        |        |   |        |        |        |   |         |        |        |   |        |        |        |   |         |        |        |   |         |        |        |   |         |        |        |   |         |        |        |   |         |        |        |   |         |        |        |   |        |        |        |   |         |        |        |   |        |        |        |   |        |        |        |   |        |        |        |   |        |        |        |   |        |        |        |   |        |        |        |   |        |        |        |
| B                                                                                                                                                                                                                                                                                                                                                                                                                                                                                                                                                                                                                                                                                                                                                                                                                                                                                                                                                                                                                                                                                                                                                                                                                                                                                                                                                                                                                                                                                                                                                                                                                                                                                                                                                                                                                                                                                                                                                                                                                                                                                                          | 8.7945                                    | 8.7157  | 0.6482  |         |   |         |        |        |   |         |        |         |   |        |        |        |   |         |        |         |   |        |        |        |   |        |        |         |   |         |        |        |   |         |        |         |   |         |        |        |    |        |        |        |                                                                                                                                                                                                                                                                                                                                                                                                                                                                                                                                                                                                                                                                                                                                                                                                                      |        |        |        |         |        |        |        |        |         |        |        |         |        |        |        |        |         |        |        |         |         |        |        |        |         |        |        |         |         |         |        |        |         |         |        |         |         |         |        |        |        |        |        |        |         |        |        |   |        |        |        |   |        |        |        |   |        |        |        |   |        |        |        |   |        |        |        |   |        |        |        |   |        |        |        |                                                                                                                                                                                                                                                                                                                                                                                                                                                                                                                                                                                                                                                                                                                                                                                                                                                                                                                                                                                                                                                                                                                                                                                                                                                                                                                                                                                                                                                                                                                                                                                                                                                                                                                                                                                                                                                                                                                                                                                                                                                                                                            |   |         |        |        |   |         |        |        |   |         |        |        |   |        |        |        |   |         |        |        |   |        |        |        |   |        |        |        |   |        |        |        |   |        |        |        |   |        |        |        |   |        |        |        |   |        |        |        |   |        |        |        |   |         |        |        |   |        |        |        |   |         |        |        |   |         |        |        |   |         |        |        |   |         |        |        |   |         |        |        |   |         |        |        |   |        |        |        |   |         |        |        |   |        |        |        |   |        |        |        |   |        |        |        |   |        |        |        |   |        |        |        |   |        |        |        |   |        |        |        |
| B                                                                                                                                                                                                                                                                                                                                                                                                                                                                                                                                                                                                                                                                                                                                                                                                                                                                                                                                                                                                                                                                                                                                                                                                                                                                                                                                                                                                                                                                                                                                                                                                                                                                                                                                                                                                                                                                                                                                                                                                                                                                                                          | 10.0296                                   | 8.4955  | 2.7754  |         |   |         |        |        |   |         |        |         |   |        |        |        |   |         |        |         |   |        |        |        |   |        |        |         |   |         |        |        |   |         |        |         |   |         |        |        |    |        |        |        |                                                                                                                                                                                                                                                                                                                                                                                                                                                                                                                                                                                                                                                                                                                                                                                                                      |        |        |        |         |        |        |        |        |         |        |        |         |        |        |        |        |         |        |        |         |         |        |        |        |         |        |        |         |         |         |        |        |         |         |        |         |         |         |        |        |        |        |        |        |         |        |        |   |        |        |        |   |        |        |        |   |        |        |        |   |        |        |        |   |        |        |        |   |        |        |        |   |        |        |        |                                                                                                                                                                                                                                                                                                                                                                                                                                                                                                                                                                                                                                                                                                                                                                                                                                                                                                                                                                                                                                                                                                                                                                                                                                                                                                                                                                                                                                                                                                                                                                                                                                                                                                                                                                                                                                                                                                                                                                                                                                                                                                            |   |         |        |        |   |         |        |        |   |         |        |        |   |        |        |        |   |         |        |        |   |        |        |        |   |        |        |        |   |        |        |        |   |        |        |        |   |        |        |        |   |        |        |        |   |        |        |        |   |        |        |        |   |         |        |        |   |        |        |        |   |         |        |        |   |         |        |        |   |         |        |        |   |         |        |        |   |         |        |        |   |         |        |        |   |        |        |        |   |         |        |        |   |        |        |        |   |        |        |        |   |        |        |        |   |        |        |        |   |        |        |        |   |        |        |        |   |        |        |        |
| B                                                                                                                                                                                                                                                                                                                                                                                                                                                                                                                                                                                                                                                                                                                                                                                                                                                                                                                                                                                                                                                                                                                                                                                                                                                                                                                                                                                                                                                                                                                                                                                                                                                                                                                                                                                                                                                                                                                                                                                                                                                                                                          | 6.4729                                    | 7.8711  | 0.6492  |         |   |         |        |        |   |         |        |         |   |        |        |        |   |         |        |         |   |        |        |        |   |        |        |         |   |         |        |        |   |         |        |         |   |         |        |        |    |        |        |        |                                                                                                                                                                                                                                                                                                                                                                                                                                                                                                                                                                                                                                                                                                                                                                                                                      |        |        |        |         |        |        |        |        |         |        |        |         |        |        |        |        |         |        |        |         |         |        |        |        |         |        |        |         |         |         |        |        |         |         |        |         |         |         |        |        |        |        |        |        |         |        |        |   |        |        |        |   |        |        |        |   |        |        |        |   |        |        |        |   |        |        |        |   |        |        |        |   |        |        |        |                                                                                                                                                                                                                                                                                                                                                                                                                                                                                                                                                                                                                                                                                                                                                                                                                                                                                                                                                                                                                                                                                                                                                                                                                                                                                                                                                                                                                                                                                                                                                                                                                                                                                                                                                                                                                                                                                                                                                                                                                                                                                                            |   |         |        |        |   |         |        |        |   |         |        |        |   |        |        |        |   |         |        |        |   |        |        |        |   |        |        |        |   |        |        |        |   |        |        |        |   |        |        |        |   |        |        |        |   |        |        |        |   |        |        |        |   |         |        |        |   |        |        |        |   |         |        |        |   |         |        |        |   |         |        |        |   |         |        |        |   |         |        |        |   |         |        |        |   |        |        |        |   |         |        |        |   |        |        |        |   |        |        |        |   |        |        |        |   |        |        |        |   |        |        |        |   |        |        |        |   |        |        |        |
| B                                                                                                                                                                                                                                                                                                                                                                                                                                                                                                                                                                                                                                                                                                                                                                                                                                                                                                                                                                                                                                                                                                                                                                                                                                                                                                                                                                                                                                                                                                                                                                                                                                                                                                                                                                                                                                                                                                                                                                                                                                                                                                          | 7.5600                                    | 8.4978  | 2.7767  |         |   |         |        |        |   |         |        |         |   |        |        |        |   |         |        |         |   |        |        |        |   |        |        |         |   |         |        |        |   |         |        |         |   |         |        |        |    |        |        |        |                                                                                                                                                                                                                                                                                                                                                                                                                                                                                                                                                                                                                                                                                                                                                                                                                      |        |        |        |         |        |        |        |        |         |        |        |         |        |        |        |        |         |        |        |         |         |        |        |        |         |        |        |         |         |         |        |        |         |         |        |         |         |         |        |        |        |        |        |        |         |        |        |   |        |        |        |   |        |        |        |   |        |        |        |   |        |        |        |   |        |        |        |   |        |        |        |   |        |        |        |                                                                                                                                                                                                                                                                                                                                                                                                                                                                                                                                                                                                                                                                                                                                                                                                                                                                                                                                                                                                                                                                                                                                                                                                                                                                                                                                                                                                                                                                                                                                                                                                                                                                                                                                                                                                                                                                                                                                                                                                                                                                                                            |   |         |        |        |   |         |        |        |   |         |        |        |   |        |        |        |   |         |        |        |   |        |        |        |   |        |        |        |   |        |        |        |   |        |        |        |   |        |        |        |   |        |        |        |   |        |        |        |   |        |        |        |   |         |        |        |   |        |        |        |   |         |        |        |   |         |        |        |   |         |        |        |   |         |        |        |   |         |        |        |   |         |        |        |   |        |        |        |   |         |        |        |   |        |        |        |   |        |        |        |   |        |        |        |   |        |        |        |   |        |        |        |   |        |        |        |   |        |        |        |
| B                                                                                                                                                                                                                                                                                                                                                                                                                                                                                                                                                                                                                                                                                                                                                                                                                                                                                                                                                                                                                                                                                                                                                                                                                                                                                                                                                                                                                                                                                                                                                                                                                                                                                                                                                                                                                                                                                                                                                                                                                                                                                                          | 5.2387                                    | 5.7325  | 0.6500  |         |   |         |        |        |   |         |        |         |   |        |        |        |   |         |        |         |   |        |        |        |   |        |        |         |   |         |        |        |   |         |        |         |   |         |        |        |    |        |        |        |                                                                                                                                                                                                                                                                                                                                                                                                                                                                                                                                                                                                                                                                                                                                                                                                                      |        |        |        |         |        |        |        |        |         |        |        |         |        |        |        |        |         |        |        |         |         |        |        |        |         |        |        |         |         |         |        |        |         |         |        |         |         |         |        |        |        |        |        |        |         |        |        |   |        |        |        |   |        |        |        |   |        |        |        |   |        |        |        |   |        |        |        |   |        |        |        |   |        |        |        |                                                                                                                                                                                                                                                                                                                                                                                                                                                                                                                                                                                                                                                                                                                                                                                                                                                                                                                                                                                                                                                                                                                                                                                                                                                                                                                                                                                                                                                                                                                                                                                                                                                                                                                                                                                                                                                                                                                                                                                                                                                                                                            |   |         |        |        |   |         |        |        |   |         |        |        |   |        |        |        |   |         |        |        |   |        |        |        |   |        |        |        |   |        |        |        |   |        |        |        |   |        |        |        |   |        |        |        |   |        |        |        |   |        |        |        |   |         |        |        |   |        |        |        |   |         |        |        |   |         |        |        |   |         |        |        |   |         |        |        |   |         |        |        |   |         |        |        |   |        |        |        |   |         |        |        |   |        |        |        |   |        |        |        |   |        |        |        |   |        |        |        |   |        |        |        |   |        |        |        |   |        |        |        |
| B                                                                                                                                                                                                                                                                                                                                                                                                                                                                                                                                                                                                                                                                                                                                                                                                                                                                                                                                                                                                                                                                                                                                                                                                                                                                                                                                                                                                                                                                                                                                                                                                                                                                                                                                                                                                                                                                                                                                                                                                                                                                                                          | 5.6712                                    | 6.9095  | 2.7790  |         |   |         |        |        |   |         |        |         |   |        |        |        |   |         |        |         |   |        |        |        |   |        |        |         |   |         |        |        |   |         |        |         |   |         |        |        |    |        |        |        |                                                                                                                                                                                                                                                                                                                                                                                                                                                                                                                                                                                                                                                                                                                                                                                                                      |        |        |        |         |        |        |        |        |         |        |        |         |        |        |        |        |         |        |        |         |         |        |        |        |         |        |        |         |         |         |        |        |         |         |        |         |         |         |        |        |        |        |        |        |         |        |        |   |        |        |        |   |        |        |        |   |        |        |        |   |        |        |        |   |        |        |        |   |        |        |        |   |        |        |        |                                                                                                                                                                                                                                                                                                                                                                                                                                                                                                                                                                                                                                                                                                                                                                                                                                                                                                                                                                                                                                                                                                                                                                                                                                                                                                                                                                                                                                                                                                                                                                                                                                                                                                                                                                                                                                                                                                                                                                                                                                                                                                            |   |         |        |        |   |         |        |        |   |         |        |        |   |        |        |        |   |         |        |        |   |        |        |        |   |        |        |        |   |        |        |        |   |        |        |        |   |        |        |        |   |        |        |        |   |        |        |        |   |        |        |        |   |         |        |        |   |        |        |        |   |         |        |        |   |         |        |        |   |         |        |        |   |         |        |        |   |         |        |        |   |         |        |        |   |        |        |        |   |         |        |        |   |        |        |        |   |        |        |        |   |        |        |        |   |        |        |        |   |        |        |        |   |        |        |        |   |        |        |        |
| B                                                                                                                                                                                                                                                                                                                                                                                                                                                                                                                                                                                                                                                                                                                                                                                                                                                                                                                                                                                                                                                                                                                                                                                                                                                                                                                                                                                                                                                                                                                                                                                                                                                                                                                                                                                                                                                                                                                                                                                                                                                                                                          | 5.6687                                    | 3.3003  | 0.6492  |         |   |         |        |        |   |         |        |         |   |        |        |        |   |         |        |         |   |        |        |        |   |        |        |         |   |         |        |        |   |         |        |         |   |         |        |        |    |        |        |        |                                                                                                                                                                                                                                                                                                                                                                                                                                                                                                                                                                                                                                                                                                                                                                                                                      |        |        |        |         |        |        |        |        |         |        |        |         |        |        |        |        |         |        |        |         |         |        |        |        |         |        |        |         |         |         |        |        |         |         |        |         |         |         |        |        |        |        |        |        |         |        |        |   |        |        |        |   |        |        |        |   |        |        |        |   |        |        |        |   |        |        |        |   |        |        |        |   |        |        |        |                                                                                                                                                                                                                                                                                                                                                                                                                                                                                                                                                                                                                                                                                                                                                                                                                                                                                                                                                                                                                                                                                                                                                                                                                                                                                                                                                                                                                                                                                                                                                                                                                                                                                                                                                                                                                                                                                                                                                                                                                                                                                                            |   |         |        |        |   |         |        |        |   |         |        |        |   |        |        |        |   |         |        |        |   |        |        |        |   |        |        |        |   |        |        |        |   |        |        |        |   |        |        |        |   |        |        |        |   |        |        |        |   |        |        |        |   |         |        |        |   |        |        |        |   |         |        |        |   |         |        |        |   |         |        |        |   |         |        |        |   |         |        |        |   |         |        |        |   |        |        |        |   |         |        |        |   |        |        |        |   |        |        |        |   |        |        |        |   |        |        |        |   |        |        |        |   |        |        |        |   |        |        |        |
| B                                                                                                                                                                                                                                                                                                                                                                                                                                                                                                                                                                                                                                                                                                                                                                                                                                                                                                                                                                                                                                                                                                                                                                                                                                                                                                                                                                                                                                                                                                                                                                                                                                                                                                                                                                                                                                                                                                                                                                                                                                                                                                          | 5.2423                                    | 4.4784  | 2.7787  |         |   |         |        |        |   |         |        |         |   |        |        |        |   |         |        |         |   |        |        |        |   |        |        |         |   |         |        |        |   |         |        |         |   |         |        |        |    |        |        |        |                                                                                                                                                                                                                                                                                                                                                                                                                                                                                                                                                                                                                                                                                                                                                                                                                      |        |        |        |         |        |        |        |        |         |        |        |         |        |        |        |        |         |        |        |         |         |        |        |        |         |        |        |         |         |         |        |        |         |         |        |         |         |         |        |        |        |        |        |        |         |        |        |   |        |        |        |   |        |        |        |   |        |        |        |   |        |        |        |   |        |        |        |   |        |        |        |   |        |        |        |                                                                                                                                                                                                                                                                                                                                                                                                                                                                                                                                                                                                                                                                                                                                                                                                                                                                                                                                                                                                                                                                                                                                                                                                                                                                                                                                                                                                                                                                                                                                                                                                                                                                                                                                                                                                                                                                                                                                                                                                                                                                                                            |   |         |        |        |   |         |        |        |   |         |        |        |   |        |        |        |   |         |        |        |   |        |        |        |   |        |        |        |   |        |        |        |   |        |        |        |   |        |        |        |   |        |        |        |   |        |        |        |   |        |        |        |   |         |        |        |   |        |        |        |   |         |        |        |   |         |        |        |   |         |        |        |   |         |        |        |   |         |        |        |   |         |        |        |   |        |        |        |   |         |        |        |   |        |        |        |   |        |        |        |   |        |        |        |   |        |        |        |   |        |        |        |   |        |        |        |   |        |        |        |
| B                                                                                                                                                                                                                                                                                                                                                                                                                                                                                                                                                                                                                                                                                                                                                                                                                                                                                                                                                                                                                                                                                                                                                                                                                                                                                                                                                                                                                                                                                                                                                                                                                                                                                                                                                                                                                                                                                                                                                                                                                                                                                                          | 7.5622                                    | 1.7138  | 0.6483  |         |   |         |        |        |   |         |        |         |   |        |        |        |   |         |        |         |   |        |        |        |   |        |        |         |   |         |        |        |   |         |        |         |   |         |        |        |    |        |        |        |                                                                                                                                                                                                                                                                                                                                                                                                                                                                                                                                                                                                                                                                                                                                                                                                                      |        |        |        |         |        |        |        |        |         |        |        |         |        |        |        |        |         |        |        |         |         |        |        |        |         |        |        |         |         |         |        |        |         |         |        |         |         |         |        |        |        |        |        |        |         |        |        |   |        |        |        |   |        |        |        |   |        |        |        |   |        |        |        |   |        |        |        |   |        |        |        |   |        |        |        |                                                                                                                                                                                                                                                                                                                                                                                                                                                                                                                                                                                                                                                                                                                                                                                                                                                                                                                                                                                                                                                                                                                                                                                                                                                                                                                                                                                                                                                                                                                                                                                                                                                                                                                                                                                                                                                                                                                                                                                                                                                                                                            |   |         |        |        |   |         |        |        |   |         |        |        |   |        |        |        |   |         |        |        |   |        |        |        |   |        |        |        |   |        |        |        |   |        |        |        |   |        |        |        |   |        |        |        |   |        |        |        |   |        |        |        |   |         |        |        |   |        |        |        |   |         |        |        |   |         |        |        |   |         |        |        |   |         |        |        |   |         |        |        |   |         |        |        |   |        |        |        |   |         |        |        |   |        |        |        |   |        |        |        |   |        |        |        |   |        |        |        |   |        |        |        |   |        |        |        |   |        |        |        |
| B                                                                                                                                                                                                                                                                                                                                                                                                                                                                                                                                                                                                                                                                                                                                                                                                                                                                                                                                                                                                                                                                                                                                                                                                                                                                                                                                                                                                                                                                                                                                                                                                                                                                                                                                                                                                                                                                                                                                                                                                                                                                                                          | 6.4770                                    | 2.3418  | 2.7764  |         |   |         |        |        |   |         |        |         |   |        |        |        |   |         |        |         |   |        |        |        |   |        |        |         |   |         |        |        |   |         |        |         |   |         |        |        |    |        |        |        |                                                                                                                                                                                                                                                                                                                                                                                                                                                                                                                                                                                                                                                                                                                                                                                                                      |        |        |        |         |        |        |        |        |         |        |        |         |        |        |        |        |         |        |        |         |         |        |        |        |         |        |        |         |         |         |        |        |         |         |        |         |         |         |        |        |        |        |        |        |         |        |        |   |        |        |        |   |        |        |        |   |        |        |        |   |        |        |        |   |        |        |        |   |        |        |        |   |        |        |        |                                                                                                                                                                                                                                                                                                                                                                                                                                                                                                                                                                                                                                                                                                                                                                                                                                                                                                                                                                                                                                                                                                                                                                                                                                                                                                                                                                                                                                                                                                                                                                                                                                                                                                                                                                                                                                                                                                                                                                                                                                                                                                            |   |         |        |        |   |         |        |        |   |         |        |        |   |        |        |        |   |         |        |        |   |        |        |        |   |        |        |        |   |        |        |        |   |        |        |        |   |        |        |        |   |        |        |        |   |        |        |        |   |        |        |        |   |         |        |        |   |        |        |        |   |         |        |        |   |         |        |        |   |         |        |        |   |         |        |        |   |         |        |        |   |         |        |        |   |        |        |        |   |         |        |        |   |        |        |        |   |        |        |        |   |        |        |        |   |        |        |        |   |        |        |        |   |        |        |        |   |        |        |        |
| B                                                                                                                                                                                                                                                                                                                                                                                                                                                                                                                                                                                                                                                                                                                                                                                                                                                                                                                                                                                                                                                                                                                                                                                                                                                                                                                                                                                                                                                                                                                                                                                                                                                                                                                                                                                                                                                                                                                                                                                                                                                                                                          | 10.0329                                   | 1.7166  | 0.6473  |         |   |         |        |        |   |         |        |         |   |        |        |        |   |         |        |         |   |        |        |        |   |        |        |         |   |         |        |        |   |         |        |         |   |         |        |        |    |        |        |        |                                                                                                                                                                                                                                                                                                                                                                                                                                                                                                                                                                                                                                                                                                                                                                                                                      |        |        |        |         |        |        |        |        |         |        |        |         |        |        |        |        |         |        |        |         |         |        |        |        |         |        |        |         |         |         |        |        |         |         |        |         |         |         |        |        |        |        |        |        |         |        |        |   |        |        |        |   |        |        |        |   |        |        |        |   |        |        |        |   |        |        |        |   |        |        |        |   |        |        |        |                                                                                                                                                                                                                                                                                                                                                                                                                                                                                                                                                                                                                                                                                                                                                                                                                                                                                                                                                                                                                                                                                                                                                                                                                                                                                                                                                                                                                                                                                                                                                                                                                                                                                                                                                                                                                                                                                                                                                                                                                                                                                                            |   |         |        |        |   |         |        |        |   |         |        |        |   |        |        |        |   |         |        |        |   |        |        |        |   |        |        |        |   |        |        |        |   |        |        |        |   |        |        |        |   |        |        |        |   |        |        |        |   |        |        |        |   |         |        |        |   |        |        |        |   |         |        |        |   |         |        |        |   |         |        |        |   |         |        |        |   |         |        |        |   |         |        |        |   |        |        |        |   |         |        |        |   |        |        |        |   |        |        |        |   |        |        |        |   |        |        |        |   |        |        |        |   |        |        |        |   |        |        |        |
| B                                                                                                                                                                                                                                                                                                                                                                                                                                                                                                                                                                                                                                                                                                                                                                                                                                                                                                                                                                                                                                                                                                                                                                                                                                                                                                                                                                                                                                                                                                                                                                                                                                                                                                                                                                                                                                                                                                                                                                                                                                                                                                          | 8.8004                                    | 1.4990  | 2.7756  |         |   |         |        |        |   |         |        |         |   |        |        |        |   |         |        |         |   |        |        |        |   |        |        |         |   |         |        |        |   |         |        |         |   |         |        |        |    |        |        |        |                                                                                                                                                                                                                                                                                                                                                                                                                                                                                                                                                                                                                                                                                                                                                                                                                      |        |        |        |         |        |        |        |        |         |        |        |         |        |        |        |        |         |        |        |         |         |        |        |        |         |        |        |         |         |         |        |        |         |         |        |         |         |         |        |        |        |        |        |        |         |        |        |   |        |        |        |   |        |        |        |   |        |        |        |   |        |        |        |   |        |        |        |   |        |        |        |   |        |        |        |                                                                                                                                                                                                                                                                                                                                                                                                                                                                                                                                                                                                                                                                                                                                                                                                                                                                                                                                                                                                                                                                                                                                                                                                                                                                                                                                                                                                                                                                                                                                                                                                                                                                                                                                                                                                                                                                                                                                                                                                                                                                                                            |   |         |        |        |   |         |        |        |   |         |        |        |   |        |        |        |   |         |        |        |   |        |        |        |   |        |        |        |   |        |        |        |   |        |        |        |   |        |        |        |   |        |        |        |   |        |        |        |   |        |        |        |   |         |        |        |   |        |        |        |   |         |        |        |   |         |        |        |   |         |        |        |   |         |        |        |   |         |        |        |   |         |        |        |   |        |        |        |   |         |        |        |   |        |        |        |   |        |        |        |   |        |        |        |   |        |        |        |   |        |        |        |   |        |        |        |   |        |        |        |
| B                                                                                                                                                                                                                                                                                                                                                                                                                                                                                                                                                                                                                                                                                                                                                                                                                                                                                                                                                                                                                                                                                                                                                                                                                                                                                                                                                                                                                                                                                                                                                                                                                                                                                                                                                                                                                                                                                                                                                                                                                                                                                                          | 11.9258                                   | 3.3017  | 0.6461  |         |   |         |        |        |   |         |        |         |   |        |        |        |   |         |        |         |   |        |        |        |   |        |        |         |   |         |        |        |   |         |        |         |   |         |        |        |    |        |        |        |                                                                                                                                                                                                                                                                                                                                                                                                                                                                                                                                                                                                                                                                                                                                                                                                                      |        |        |        |         |        |        |        |        |         |        |        |         |        |        |        |        |         |        |        |         |         |        |        |        |         |        |        |         |         |         |        |        |         |         |        |         |         |         |        |        |        |        |        |        |         |        |        |   |        |        |        |   |        |        |        |   |        |        |        |   |        |        |        |   |        |        |        |   |        |        |        |   |        |        |        |                                                                                                                                                                                                                                                                                                                                                                                                                                                                                                                                                                                                                                                                                                                                                                                                                                                                                                                                                                                                                                                                                                                                                                                                                                                                                                                                                                                                                                                                                                                                                                                                                                                                                                                                                                                                                                                                                                                                                                                                                                                                                                            |   |         |        |        |   |         |        |        |   |         |        |        |   |        |        |        |   |         |        |        |   |        |        |        |   |        |        |        |   |        |        |        |   |        |        |        |   |        |        |        |   |        |        |        |   |        |        |        |   |        |        |        |   |         |        |        |   |        |        |        |   |         |        |        |   |         |        |        |   |         |        |        |   |         |        |        |   |         |        |        |   |         |        |        |   |        |        |        |   |         |        |        |   |        |        |        |   |        |        |        |   |        |        |        |   |        |        |        |   |        |        |        |   |        |        |        |   |        |        |        |
| B                                                                                                                                                                                                                                                                                                                                                                                                                                                                                                                                                                                                                                                                                                                                                                                                                                                                                                                                                                                                                                                                                                                                                                                                                                                                                                                                                                                                                                                                                                                                                                                                                                                                                                                                                                                                                                                                                                                                                                                                                                                                                                          | 11.1328                                   | 2.3369  | 2.7737  |         |   |         |        |        |   |         |        |         |   |        |        |        |   |         |        |         |   |        |        |        |   |        |        |         |   |         |        |        |   |         |        |         |   |         |        |        |    |        |        |        |                                                                                                                                                                                                                                                                                                                                                                                                                                                                                                                                                                                                                                                                                                                                                                                                                      |        |        |        |         |        |        |        |        |         |        |        |         |        |        |        |        |         |        |        |         |         |        |        |        |         |        |        |         |         |         |        |        |         |         |        |         |         |         |        |        |        |        |        |        |         |        |        |   |        |        |        |   |        |        |        |   |        |        |        |   |        |        |        |   |        |        |        |   |        |        |        |   |        |        |        |                                                                                                                                                                                                                                                                                                                                                                                                                                                                                                                                                                                                                                                                                                                                                                                                                                                                                                                                                                                                                                                                                                                                                                                                                                                                                                                                                                                                                                                                                                                                                                                                                                                                                                                                                                                                                                                                                                                                                                                                                                                                                                            |   |         |        |        |   |         |        |        |   |         |        |        |   |        |        |        |   |         |        |        |   |        |        |        |   |        |        |        |   |        |        |        |   |        |        |        |   |        |        |        |   |        |        |        |   |        |        |        |   |        |        |        |   |         |        |        |   |        |        |        |   |         |        |        |   |         |        |        |   |         |        |        |   |         |        |        |   |         |        |        |   |         |        |        |   |        |        |        |   |         |        |        |   |        |        |        |   |        |        |        |   |        |        |        |   |        |        |        |   |        |        |        |   |        |        |        |   |        |        |        |
| B                                                                                                                                                                                                                                                                                                                                                                                                                                                                                                                                                                                                                                                                                                                                                                                                                                                                                                                                                                                                                                                                                                                                                                                                                                                                                                                                                                                                                                                                                                                                                                                                                                                                                                                                                                                                                                                                                                                                                                                                                                                                                                          | 12.3848                                   | 4.4736  | 2.7704  |         |   |         |        |        |   |         |        |         |   |        |        |        |   |         |        |         |   |        |        |        |   |        |        |         |   |         |        |        |   |         |        |         |   |         |        |        |    |        |        |        |                                                                                                                                                                                                                                                                                                                                                                                                                                                                                                                                                                                                                                                                                                                                                                                                                      |        |        |        |         |        |        |        |        |         |        |        |         |        |        |        |        |         |        |        |         |         |        |        |        |         |        |        |         |         |         |        |        |         |         |        |         |         |         |        |        |        |        |        |        |         |        |        |   |        |        |        |   |        |        |        |   |        |        |        |   |        |        |        |   |        |        |        |   |        |        |        |   |        |        |        |                                                                                                                                                                                                                                                                                                                                                                                                                                                                                                                                                                                                                                                                                                                                                                                                                                                                                                                                                                                                                                                                                                                                                                                                                                                                                                                                                                                                                                                                                                                                                                                                                                                                                                                                                                                                                                                                                                                                                                                                                                                                                                            |   |         |        |        |   |         |        |        |   |         |        |        |   |        |        |        |   |         |        |        |   |        |        |        |   |        |        |        |   |        |        |        |   |        |        |        |   |        |        |        |   |        |        |        |   |        |        |        |   |        |        |        |   |         |        |        |   |        |        |        |   |         |        |        |   |         |        |        |   |         |        |        |   |         |        |        |   |         |        |        |   |         |        |        |   |        |        |        |   |         |        |        |   |        |        |        |   |        |        |        |   |        |        |        |   |        |        |        |   |        |        |        |   |        |        |        |   |        |        |        |
| B                                                                                                                                                                                                                                                                                                                                                                                                                                                                                                                                                                                                                                                                                                                                                                                                                                                                                                                                                                                                                                                                                                                                                                                                                                                                                                                                                                                                                                                                                                                                                                                                                                                                                                                                                                                                                                                                                                                                                                                                                                                                                                          | 12.3211                                   | 5.7321  | 4.8737  |         |   |         |        |        |   |         |        |         |   |        |        |        |   |         |        |         |   |        |        |        |   |        |        |         |   |         |        |        |   |         |        |         |   |         |        |        |    |        |        |        |                                                                                                                                                                                                                                                                                                                                                                                                                                                                                                                                                                                                                                                                                                                                                                                                                      |        |        |        |         |        |        |        |        |         |        |        |         |        |        |        |        |         |        |        |         |         |        |        |        |         |        |        |         |         |         |        |        |         |         |        |         |         |         |        |        |        |        |        |        |         |        |        |   |        |        |        |   |        |        |        |   |        |        |        |   |        |        |        |   |        |        |        |   |        |        |        |   |        |        |        |                                                                                                                                                                                                                                                                                                                                                                                                                                                                                                                                                                                                                                                                                                                                                                                                                                                                                                                                                                                                                                                                                                                                                                                                                                                                                                                                                                                                                                                                                                                                                                                                                                                                                                                                                                                                                                                                                                                                                                                                                                                                                                            |   |         |        |        |   |         |        |        |   |         |        |        |   |        |        |        |   |         |        |        |   |        |        |        |   |        |        |        |   |        |        |        |   |        |        |        |   |        |        |        |   |        |        |        |   |        |        |        |   |        |        |        |   |         |        |        |   |        |        |        |   |         |        |        |   |         |        |        |   |         |        |        |   |         |        |        |   |         |        |        |   |         |        |        |   |        |        |        |   |         |        |        |   |        |        |        |   |        |        |        |   |        |        |        |   |        |        |        |   |        |        |        |   |        |        |        |   |        |        |        |
| B                                                                                                                                                                                                                                                                                                                                                                                                                                                                                                                                                                                                                                                                                                                                                                                                                                                                                                                                                                                                                                                                                                                                                                                                                                                                                                                                                                                                                                                                                                                                                                                                                                                                                                                                                                                                                                                                                                                                                                                                                                                                                                          | 11.0753                                   | 7.8595  | 4.8898  |         |   |         |        |        |   |         |        |         |   |        |        |        |   |         |        |         |   |        |        |        |   |        |        |         |   |         |        |        |   |         |        |         |   |         |        |        |    |        |        |        |                                                                                                                                                                                                                                                                                                                                                                                                                                                                                                                                                                                                                                                                                                                                                                                                                      |        |        |        |         |        |        |        |        |         |        |        |         |        |        |        |        |         |        |        |         |         |        |        |        |         |        |        |         |         |         |        |        |         |         |        |         |         |         |        |        |        |        |        |        |         |        |        |   |        |        |        |   |        |        |        |   |        |        |        |   |        |        |        |   |        |        |        |   |        |        |        |   |        |        |        |                                                                                                                                                                                                                                                                                                                                                                                                                                                                                                                                                                                                                                                                                                                                                                                                                                                                                                                                                                                                                                                                                                                                                                                                                                                                                                                                                                                                                                                                                                                                                                                                                                                                                                                                                                                                                                                                                                                                                                                                                                                                                                            |   |         |        |        |   |         |        |        |   |         |        |        |   |        |        |        |   |         |        |        |   |        |        |        |   |        |        |        |   |        |        |        |   |        |        |        |   |        |        |        |   |        |        |        |   |        |        |        |   |        |        |        |   |         |        |        |   |        |        |        |   |         |        |        |   |         |        |        |   |         |        |        |   |         |        |        |   |         |        |        |   |         |        |        |   |        |        |        |   |         |        |        |   |        |        |        |   |        |        |        |   |        |        |        |   |        |        |        |   |        |        |        |   |        |        |        |   |        |        |        |
| B                                                                                                                                                                                                                                                                                                                                                                                                                                                                                                                                                                                                                                                                                                                                                                                                                                                                                                                                                                                                                                                                                                                                                                                                                                                                                                                                                                                                                                                                                                                                                                                                                                                                                                                                                                                                                                                                                                                                                                                                                                                                                                          | 11.9133                                   | 6.9060  | 7.0434  |         |   |         |        |        |   |         |        |         |   |        |        |        |   |         |        |         |   |        |        |        |   |        |        |         |   |         |        |        |   |         |        |         |   |         |        |        |    |        |        |        |                                                                                                                                                                                                                                                                                                                                                                                                                                                                                                                                                                                                                                                                                                                                                                                                                      |        |        |        |         |        |        |        |        |         |        |        |         |        |        |        |        |         |        |        |         |         |        |        |        |         |        |        |         |         |         |        |        |         |         |        |         |         |         |        |        |        |        |        |        |         |        |        |   |        |        |        |   |        |        |        |   |        |        |        |   |        |        |        |   |        |        |        |   |        |        |        |   |        |        |        |                                                                                                                                                                                                                                                                                                                                                                                                                                                                                                                                                                                                                                                                                                                                                                                                                                                                                                                                                                                                                                                                                                                                                                                                                                                                                                                                                                                                                                                                                                                                                                                                                                                                                                                                                                                                                                                                                                                                                                                                                                                                                                            |   |         |        |        |   |         |        |        |   |         |        |        |   |        |        |        |   |         |        |        |   |        |        |        |   |        |        |        |   |        |        |        |   |        |        |        |   |        |        |        |   |        |        |        |   |        |        |        |   |        |        |        |   |         |        |        |   |        |        |        |   |         |        |        |   |         |        |        |   |         |        |        |   |         |        |        |   |         |        |        |   |         |        |        |   |        |        |        |   |         |        |        |   |        |        |        |   |        |        |        |   |        |        |        |   |        |        |        |   |        |        |        |   |        |        |        |   |        |        |        |
| B                                                                                                                                                                                                                                                                                                                                                                                                                                                                                                                                                                                                                                                                                                                                                                                                                                                                                                                                                                                                                                                                                                                                                                                                                                                                                                                                                                                                                                                                                                                                                                                                                                                                                                                                                                                                                                                                                                                                                                                                                                                                                                          | 8.7798                                    | 8.7231  | 4.8984  |         |   |         |        |        |   |         |        |         |   |        |        |        |   |         |        |         |   |        |        |        |   |        |        |         |   |         |        |        |   |         |        |         |   |         |        |        |    |        |        |        |                                                                                                                                                                                                                                                                                                                                                                                                                                                                                                                                                                                                                                                                                                                                                                                                                      |        |        |        |         |        |        |        |        |         |        |        |         |        |        |        |        |         |        |        |         |         |        |        |        |         |        |        |         |         |         |        |        |         |         |        |         |         |         |        |        |        |        |        |        |         |        |        |   |        |        |        |   |        |        |        |   |        |        |        |   |        |        |        |   |        |        |        |   |        |        |        |   |        |        |        |                                                                                                                                                                                                                                                                                                                                                                                                                                                                                                                                                                                                                                                                                                                                                                                                                                                                                                                                                                                                                                                                                                                                                                                                                                                                                                                                                                                                                                                                                                                                                                                                                                                                                                                                                                                                                                                                                                                                                                                                                                                                                                            |   |         |        |        |   |         |        |        |   |         |        |        |   |        |        |        |   |         |        |        |   |        |        |        |   |        |        |        |   |        |        |        |   |        |        |        |   |        |        |        |   |        |        |        |   |        |        |        |   |        |        |        |   |         |        |        |   |        |        |        |   |         |        |        |   |         |        |        |   |         |        |        |   |         |        |        |   |         |        |        |   |         |        |        |   |        |        |        |   |         |        |        |   |        |        |        |   |        |        |        |   |        |        |        |   |        |        |        |   |        |        |        |   |        |        |        |   |        |        |        |
| B                                                                                                                                                                                                                                                                                                                                                                                                                                                                                                                                                                                                                                                                                                                                                                                                                                                                                                                                                                                                                                                                                                                                                                                                                                                                                                                                                                                                                                                                                                                                                                                                                                                                                                                                                                                                                                                                                                                                                                                                                                                                                                          | 10.0212                                   | 8.5111  | 7.0365  |         |   |         |        |        |   |         |        |         |   |        |        |        |   |         |        |         |   |        |        |        |   |        |        |         |   |         |        |        |   |         |        |         |   |         |        |        |    |        |        |        |                                                                                                                                                                                                                                                                                                                                                                                                                                                                                                                                                                                                                                                                                                                                                                                                                      |        |        |        |         |        |        |        |        |         |        |        |         |        |        |        |        |         |        |        |         |         |        |        |        |         |        |        |         |         |         |        |        |         |         |        |         |         |         |        |        |        |        |        |        |         |        |        |   |        |        |        |   |        |        |        |   |        |        |        |   |        |        |        |   |        |        |        |   |        |        |        |   |        |        |        |                                                                                                                                                                                                                                                                                                                                                                                                                                                                                                                                                                                                                                                                                                                                                                                                                                                                                                                                                                                                                                                                                                                                                                                                                                                                                                                                                                                                                                                                                                                                                                                                                                                                                                                                                                                                                                                                                                                                                                                                                                                                                                            |   |         |        |        |   |         |        |        |   |         |        |        |   |        |        |        |   |         |        |        |   |        |        |        |   |        |        |        |   |        |        |        |   |        |        |        |   |        |        |        |   |        |        |        |   |        |        |        |   |        |        |        |   |         |        |        |   |        |        |        |   |         |        |        |   |         |        |        |   |         |        |        |   |         |        |        |   |         |        |        |   |         |        |        |   |        |        |        |   |         |        |        |   |        |        |        |   |        |        |        |   |        |        |        |   |        |        |        |   |        |        |        |   |        |        |        |   |        |        |        |
| B                                                                                                                                                                                                                                                                                                                                                                                                                                                                                                                                                                                                                                                                                                                                                                                                                                                                                                                                                                                                                                                                                                                                                                                                                                                                                                                                                                                                                                                                                                                                                                                                                                                                                                                                                                                                                                                                                                                                                                                                                                                                                                          | 6.4699                                    | 7.8727  | 4.9028  |         |   |         |        |        |   |         |        |         |   |        |        |        |   |         |        |         |   |        |        |        |   |        |        |         |   |         |        |        |   |         |        |         |   |         |        |        |    |        |        |        |                                                                                                                                                                                                                                                                                                                                                                                                                                                                                                                                                                                                                                                                                                                                                                                                                      |        |        |        |         |        |        |        |        |         |        |        |         |        |        |        |        |         |        |        |         |         |        |        |        |         |        |        |         |         |         |        |        |         |         |        |         |         |         |        |        |        |        |        |        |         |        |        |   |        |        |        |   |        |        |        |   |        |        |        |   |        |        |        |   |        |        |        |   |        |        |        |   |        |        |        |                                                                                                                                                                                                                                                                                                                                                                                                                                                                                                                                                                                                                                                                                                                                                                                                                                                                                                                                                                                                                                                                                                                                                                                                                                                                                                                                                                                                                                                                                                                                                                                                                                                                                                                                                                                                                                                                                                                                                                                                                                                                                                            |   |         |        |        |   |         |        |        |   |         |        |        |   |        |        |        |   |         |        |        |   |        |        |        |   |        |        |        |   |        |        |        |   |        |        |        |   |        |        |        |   |        |        |        |   |        |        |        |   |        |        |        |   |         |        |        |   |        |        |        |   |         |        |        |   |         |        |        |   |         |        |        |   |         |        |        |   |         |        |        |   |         |        |        |   |        |        |        |   |         |        |        |   |        |        |        |   |        |        |        |   |        |        |        |   |        |        |        |   |        |        |        |   |        |        |        |   |        |        |        |
| B                                                                                                                                                                                                                                                                                                                                                                                                                                                                                                                                                                                                                                                                                                                                                                                                                                                                                                                                                                                                                                                                                                                                                                                                                                                                                                                                                                                                                                                                                                                                                                                                                                                                                                                                                                                                                                                                                                                                                                                                                                                                                                          | 7.5475                                    | 8.5163  | 7.0356  |         |   |         |        |        |   |         |        |         |   |        |        |        |   |         |        |         |   |        |        |        |   |        |        |         |   |         |        |        |   |         |        |         |   |         |        |        |    |        |        |        |                                                                                                                                                                                                                                                                                                                                                                                                                                                                                                                                                                                                                                                                                                                                                                                                                      |        |        |        |         |        |        |        |        |         |        |        |         |        |        |        |        |         |        |        |         |         |        |        |        |         |        |        |         |         |         |        |        |         |         |        |         |         |         |        |        |        |        |        |        |         |        |        |   |        |        |        |   |        |        |        |   |        |        |        |   |        |        |        |   |        |        |        |   |        |        |        |   |        |        |        |                                                                                                                                                                                                                                                                                                                                                                                                                                                                                                                                                                                                                                                                                                                                                                                                                                                                                                                                                                                                                                                                                                                                                                                                                                                                                                                                                                                                                                                                                                                                                                                                                                                                                                                                                                                                                                                                                                                                                                                                                                                                                                            |   |         |        |        |   |         |        |        |   |         |        |        |   |        |        |        |   |         |        |        |   |        |        |        |   |        |        |        |   |        |        |        |   |        |        |        |   |        |        |        |   |        |        |        |   |        |        |        |   |        |        |        |   |         |        |        |   |        |        |        |   |         |        |        |   |         |        |        |   |         |        |        |   |         |        |        |   |         |        |        |   |         |        |        |   |        |        |        |   |         |        |        |   |        |        |        |   |        |        |        |   |        |        |        |   |        |        |        |   |        |        |        |   |        |        |        |   |        |        |        |
| B                                                                                                                                                                                                                                                                                                                                                                                                                                                                                                                                                                                                                                                                                                                                                                                                                                                                                                                                                                                                                                                                                                                                                                                                                                                                                                                                                                                                                                                                                                                                                                                                                                                                                                                                                                                                                                                                                                                                                                                                                                                                                                          | 5.2435                                    | 5.7320  | 4.9041  |         |   |         |        |        |   |         |        |         |   |        |        |        |   |         |        |         |   |        |        |        |   |        |        |         |   |         |        |        |   |         |        |         |   |         |        |        |    |        |        |        |                                                                                                                                                                                                                                                                                                                                                                                                                                                                                                                                                                                                                                                                                                                                                                                                                      |        |        |        |         |        |        |        |        |         |        |        |         |        |        |        |        |         |        |        |         |         |        |        |        |         |        |        |         |         |         |        |        |         |         |        |         |         |         |        |        |        |        |        |        |         |        |        |   |        |        |        |   |        |        |        |   |        |        |        |   |        |        |        |   |        |        |        |   |        |        |        |   |        |        |        |                                                                                                                                                                                                                                                                                                                                                                                                                                                                                                                                                                                                                                                                                                                                                                                                                                                                                                                                                                                                                                                                                                                                                                                                                                                                                                                                                                                                                                                                                                                                                                                                                                                                                                                                                                                                                                                                                                                                                                                                                                                                                                            |   |         |        |        |   |         |        |        |   |         |        |        |   |        |        |        |   |         |        |        |   |        |        |        |   |        |        |        |   |        |        |        |   |        |        |        |   |        |        |        |   |        |        |        |   |        |        |        |   |        |        |        |   |         |        |        |   |        |        |        |   |         |        |        |   |         |        |        |   |         |        |        |   |         |        |        |   |         |        |        |   |         |        |        |   |        |        |        |   |         |        |        |   |        |        |        |   |        |        |        |   |        |        |        |   |        |        |        |   |        |        |        |   |        |        |        |   |        |        |        |
| B                                                                                                                                                                                                                                                                                                                                                                                                                                                                                                                                                                                                                                                                                                                                                                                                                                                                                                                                                                                                                                                                                                                                                                                                                                                                                                                                                                                                                                                                                                                                                                                                                                                                                                                                                                                                                                                                                                                                                                                                                                                                                                          | 5.6593                                    | 6.9153  | 7.0357  |         |   |         |        |        |   |         |        |         |   |        |        |        |   |         |        |         |   |        |        |        |   |        |        |         |   |         |        |        |   |         |        |         |   |         |        |        |    |        |        |        |                                                                                                                                                                                                                                                                                                                                                                                                                                                                                                                                                                                                                                                                                                                                                                                                                      |        |        |        |         |        |        |        |        |         |        |        |         |        |        |        |        |         |        |        |         |         |        |        |        |         |        |        |         |         |         |        |        |         |         |        |         |         |         |        |        |        |        |        |        |         |        |        |   |        |        |        |   |        |        |        |   |        |        |        |   |        |        |        |   |        |        |        |   |        |        |        |   |        |        |        |                                                                                                                                                                                                                                                                                                                                                                                                                                                                                                                                                                                                                                                                                                                                                                                                                                                                                                                                                                                                                                                                                                                                                                                                                                                                                                                                                                                                                                                                                                                                                                                                                                                                                                                                                                                                                                                                                                                                                                                                                                                                                                            |   |         |        |        |   |         |        |        |   |         |        |        |   |        |        |        |   |         |        |        |   |        |        |        |   |        |        |        |   |        |        |        |   |        |        |        |   |        |        |        |   |        |        |        |   |        |        |        |   |        |        |        |   |         |        |        |   |        |        |        |   |         |        |        |   |         |        |        |   |         |        |        |   |         |        |        |   |         |        |        |   |         |        |        |   |        |        |        |   |         |        |        |   |        |        |        |   |        |        |        |   |        |        |        |   |        |        |        |   |        |        |        |   |        |        |        |   |        |        |        |
| B                                                                                                                                                                                                                                                                                                                                                                                                                                                                                                                                                                                                                                                                                                                                                                                                                                                                                                                                                                                                                                                                                                                                                                                                                                                                                                                                                                                                                                                                                                                                                                                                                                                                                                                                                                                                                                                                                                                                                                                                                                                                                                          | 5.6617                                    | 3.3007  | 4.9020  |         |   |         |        |        |   |         |        |         |   |        |        |        |   |         |        |         |   |        |        |        |   |        |        |         |   |         |        |        |   |         |        |         |   |         |        |        |    |        |        |        |                                                                                                                                                                                                                                                                                                                                                                                                                                                                                                                                                                                                                                                                                                                                                                                                                      |        |        |        |         |        |        |        |        |         |        |        |         |        |        |        |        |         |        |        |         |         |        |        |        |         |        |        |         |         |         |        |        |         |         |        |         |         |         |        |        |        |        |        |        |         |        |        |   |        |        |        |   |        |        |        |   |        |        |        |   |        |        |        |   |        |        |        |   |        |        |        |   |        |        |        |                                                                                                                                                                                                                                                                                                                                                                                                                                                                                                                                                                                                                                                                                                                                                                                                                                                                                                                                                                                                                                                                                                                                                                                                                                                                                                                                                                                                                                                                                                                                                                                                                                                                                                                                                                                                                                                                                                                                                                                                                                                                                                            |   |         |        |        |   |         |        |        |   |         |        |        |   |        |        |        |   |         |        |        |   |        |        |        |   |        |        |        |   |        |        |        |   |        |        |        |   |        |        |        |   |        |        |        |   |        |        |        |   |        |        |        |   |         |        |        |   |        |        |        |   |         |        |        |   |         |        |        |   |         |        |        |   |         |        |        |   |         |        |        |   |         |        |        |   |        |        |        |   |         |        |        |   |        |        |        |   |        |        |        |   |        |        |        |   |        |        |        |   |        |        |        |   |        |        |        |   |        |        |        |
| B                                                                                                                                                                                                                                                                                                                                                                                                                                                                                                                                                                                                                                                                                                                                                                                                                                                                                                                                                                                                                                                                                                                                                                                                                                                                                                                                                                                                                                                                                                                                                                                                                                                                                                                                                                                                                                                                                                                                                                                                                                                                                                          | 5.2281                                    | 4.4775  | 7.0360  |         |   |         |        |        |   |         |        |         |   |        |        |        |   |         |        |         |   |        |        |        |   |        |        |         |   |         |        |        |   |         |        |         |   |         |        |        |    |        |        |        |                                                                                                                                                                                                                                                                                                                                                                                                                                                                                                                                                                                                                                                                                                                                                                                                                      |        |        |        |         |        |        |        |        |         |        |        |         |        |        |        |        |         |        |        |         |         |        |        |        |         |        |        |         |         |         |        |        |         |         |        |         |         |         |        |        |        |        |        |        |         |        |        |   |        |        |        |   |        |        |        |   |        |        |        |   |        |        |        |   |        |        |        |   |        |        |        |   |        |        |        |                                                                                                                                                                                                                                                                                                                                                                                                                                                                                                                                                                                                                                                                                                                                                                                                                                                                                                                                                                                                                                                                                                                                                                                                                                                                                                                                                                                                                                                                                                                                                                                                                                                                                                                                                                                                                                                                                                                                                                                                                                                                                                            |   |         |        |        |   |         |        |        |   |         |        |        |   |        |        |        |   |         |        |        |   |        |        |        |   |        |        |        |   |        |        |        |   |        |        |        |   |        |        |        |   |        |        |        |   |        |        |        |   |        |        |        |   |         |        |        |   |        |        |        |   |         |        |        |   |         |        |        |   |         |        |        |   |         |        |        |   |         |        |        |   |         |        |        |   |        |        |        |   |         |        |        |   |        |        |        |   |        |        |        |   |        |        |        |   |        |        |        |   |        |        |        |   |        |        |        |   |        |        |        |
| B                                                                                                                                                                                                                                                                                                                                                                                                                                                                                                                                                                                                                                                                                                                                                                                                                                                                                                                                                                                                                                                                                                                                                                                                                                                                                                                                                                                                                                                                                                                                                                                                                                                                                                                                                                                                                                                                                                                                                                                                                                                                                                          | 7.5439                                    | 1.7183  | 4.8971  |         |   |         |        |        |   |         |        |         |   |        |        |        |   |         |        |         |   |        |        |        |   |        |        |         |   |         |        |        |   |         |        |         |   |         |        |        |    |        |        |        |                                                                                                                                                                                                                                                                                                                                                                                                                                                                                                                                                                                                                                                                                                                                                                                                                      |        |        |        |         |        |        |        |        |         |        |        |         |        |        |        |        |         |        |        |         |         |        |        |        |         |        |        |         |         |         |        |        |         |         |        |         |         |         |        |        |        |        |        |        |         |        |        |   |        |        |        |   |        |        |        |   |        |        |        |   |        |        |        |   |        |        |        |   |        |        |        |   |        |        |        |                                                                                                                                                                                                                                                                                                                                                                                                                                                                                                                                                                                                                                                                                                                                                                                                                                                                                                                                                                                                                                                                                                                                                                                                                                                                                                                                                                                                                                                                                                                                                                                                                                                                                                                                                                                                                                                                                                                                                                                                                                                                                                            |   |         |        |        |   |         |        |        |   |         |        |        |   |        |        |        |   |         |        |        |   |        |        |        |   |        |        |        |   |        |        |        |   |        |        |        |   |        |        |        |   |        |        |        |   |        |        |        |   |        |        |        |   |         |        |        |   |        |        |        |   |         |        |        |   |         |        |        |   |         |        |        |   |         |        |        |   |         |        |        |   |         |        |        |   |        |        |        |   |         |        |        |   |        |        |        |   |        |        |        |   |        |        |        |   |        |        |        |   |        |        |        |   |        |        |        |   |        |        |        |
| B                                                                                                                                                                                                                                                                                                                                                                                                                                                                                                                                                                                                                                                                                                                                                                                                                                                                                                                                                                                                                                                                                                                                                                                                                                                                                                                                                                                                                                                                                                                                                                                                                                                                                                                                                                                                                                                                                                                                                                                                                                                                                                          | 12.4001                                   | 5.7324  | 0.6456  |         |   |         |        |        |   |         |        |         |   |        |        |        |   |         |        |         |   |        |        |        |   |        |        |         |   |         |        |        |   |         |        |         |   |         |        |        |    |        |        |        |                                                                                                                                                                                                                                                                                                                                                                                                                                                                                                                                                                                                                                                                                                                                                                                                                      |        |        |        |         |        |        |        |        |         |        |        |         |        |        |        |        |         |        |        |         |         |        |        |        |         |        |        |         |         |         |        |        |         |         |        |         |         |         |        |        |        |        |        |        |         |        |        |   |        |        |        |   |        |        |        |   |        |        |        |   |        |        |        |   |        |        |        |   |        |        |        |   |        |        |        |                                                                                                                                                                                                                                                                                                                                                                                                                                                                                                                                                                                                                                                                                                                                                                                                                                                                                                                                                                                                                                                                                                                                                                                                                                                                                                                                                                                                                                                                                                                                                                                                                                                                                                                                                                                                                                                                                                                                                                                                                                                                                                            |   |         |        |        |   |         |        |        |   |         |        |        |   |        |        |        |   |         |        |        |   |        |        |        |   |        |        |        |   |        |        |        |   |        |        |        |   |        |        |        |   |        |        |        |   |        |        |        |   |        |        |        |   |         |        |        |   |        |        |        |   |         |        |        |   |         |        |        |   |         |        |        |   |         |        |        |   |         |        |        |   |         |        |        |   |        |        |        |   |         |        |        |   |        |        |        |   |        |        |        |   |        |        |        |   |        |        |        |   |        |        |        |   |        |        |        |   |        |        |        |
| B                                                                                                                                                                                                                                                                                                                                                                                                                                                                                                                                                                                                                                                                                                                                                                                                                                                                                                                                                                                                                                                                                                                                                                                                                                                                                                                                                                                                                                                                                                                                                                                                                                                                                                                                                                                                                                                                                                                                                                                                                                                                                                          | 11.1420                                   | 7.8627  | 0.6429  |         |   |         |        |        |   |         |        |         |   |        |        |        |   |         |        |         |   |        |        |        |   |        |        |         |   |         |        |        |   |         |        |         |   |         |        |        |    |        |        |        |                                                                                                                                                                                                                                                                                                                                                                                                                                                                                                                                                                                                                                                                                                                                                                                                                      |        |        |        |         |        |        |        |        |         |        |        |         |        |        |        |        |         |        |        |         |         |        |        |        |         |        |        |         |         |         |        |        |         |         |        |         |         |         |        |        |        |        |        |        |         |        |        |   |        |        |        |   |        |        |        |   |        |        |        |   |        |        |        |   |        |        |        |   |        |        |        |   |        |        |        |                                                                                                                                                                                                                                                                                                                                                                                                                                                                                                                                                                                                                                                                                                                                                                                                                                                                                                                                                                                                                                                                                                                                                                                                                                                                                                                                                                                                                                                                                                                                                                                                                                                                                                                                                                                                                                                                                                                                                                                                                                                                                                            |   |         |        |        |   |         |        |        |   |         |        |        |   |        |        |        |   |         |        |        |   |        |        |        |   |        |        |        |   |        |        |        |   |        |        |        |   |        |        |        |   |        |        |        |   |        |        |        |   |        |        |        |   |         |        |        |   |        |        |        |   |         |        |        |   |         |        |        |   |         |        |        |   |         |        |        |   |         |        |        |   |         |        |        |   |        |        |        |   |         |        |        |   |        |        |        |   |        |        |        |   |        |        |        |   |        |        |        |   |        |        |        |   |        |        |        |   |        |        |        |
| B                                                                                                                                                                                                                                                                                                                                                                                                                                                                                                                                                                                                                                                                                                                                                                                                                                                                                                                                                                                                                                                                                                                                                                                                                                                                                                                                                                                                                                                                                                                                                                                                                                                                                                                                                                                                                                                                                                                                                                                                                                                                                                          | 11.9775                                   | 6.9180  | 2.7646  |         |   |         |        |        |   |         |        |         |   |        |        |        |   |         |        |         |   |        |        |        |   |        |        |         |   |         |        |        |   |         |        |         |   |         |        |        |    |        |        |        |                                                                                                                                                                                                                                                                                                                                                                                                                                                                                                                                                                                                                                                                                                                                                                                                                      |        |        |        |         |        |        |        |        |         |        |        |         |        |        |        |        |         |        |        |         |         |        |        |        |         |        |        |         |         |         |        |        |         |         |        |         |         |         |        |        |        |        |        |        |         |        |        |   |        |        |        |   |        |        |        |   |        |        |        |   |        |        |        |   |        |        |        |   |        |        |        |   |        |        |        |                                                                                                                                                                                                                                                                                                                                                                                                                                                                                                                                                                                                                                                                                                                                                                                                                                                                                                                                                                                                                                                                                                                                                                                                                                                                                                                                                                                                                                                                                                                                                                                                                                                                                                                                                                                                                                                                                                                                                                                                                                                                                                            |   |         |        |        |   |         |        |        |   |         |        |        |   |        |        |        |   |         |        |        |   |        |        |        |   |        |        |        |   |        |        |        |   |        |        |        |   |        |        |        |   |        |        |        |   |        |        |        |   |        |        |        |   |         |        |        |   |        |        |        |   |         |        |        |   |         |        |        |   |         |        |        |   |         |        |        |   |         |        |        |   |         |        |        |   |        |        |        |   |         |        |        |   |        |        |        |   |        |        |        |   |        |        |        |   |        |        |        |   |        |        |        |   |        |        |        |   |        |        |        |
| B                                                                                                                                                                                                                                                                                                                                                                                                                                                                                                                                                                                                                                                                                                                                                                                                                                                                                                                                                                                                                                                                                                                                                                                                                                                                                                                                                                                                                                                                                                                                                                                                                                                                                                                                                                                                                                                                                                                                                                                                                                                                                                          | 8.8066                                    | 8.6873  | 0.6417  |         |   |         |        |        |   |         |        |         |   |        |        |        |   |         |        |         |   |        |        |        |   |        |        |         |   |         |        |        |   |         |        |         |   |         |        |        |    |        |        |        |                                                                                                                                                                                                                                                                                                                                                                                                                                                                                                                                                                                                                                                                                                                                                                                                                      |        |        |        |         |        |        |        |        |         |        |        |         |        |        |        |        |         |        |        |         |         |        |        |        |         |        |        |         |         |         |        |        |         |         |        |         |         |         |        |        |        |        |        |        |         |        |        |   |        |        |        |   |        |        |        |   |        |        |        |   |        |        |        |   |        |        |        |   |        |        |        |   |        |        |        |                                                                                                                                                                                                                                                                                                                                                                                                                                                                                                                                                                                                                                                                                                                                                                                                                                                                                                                                                                                                                                                                                                                                                                                                                                                                                                                                                                                                                                                                                                                                                                                                                                                                                                                                                                                                                                                                                                                                                                                                                                                                                                            |   |         |        |        |   |         |        |        |   |         |        |        |   |        |        |        |   |         |        |        |   |        |        |        |   |        |        |        |   |        |        |        |   |        |        |        |   |        |        |        |   |        |        |        |   |        |        |        |   |        |        |        |   |         |        |        |   |        |        |        |   |         |        |        |   |         |        |        |   |         |        |        |   |         |        |        |   |         |        |        |   |         |        |        |   |        |        |        |   |         |        |        |   |        |        |        |   |        |        |        |   |        |        |        |   |        |        |        |   |        |        |        |   |        |        |        |   |        |        |        |
| B                                                                                                                                                                                                                                                                                                                                                                                                                                                                                                                                                                                                                                                                                                                                                                                                                                                                                                                                                                                                                                                                                                                                                                                                                                                                                                                                                                                                                                                                                                                                                                                                                                                                                                                                                                                                                                                                                                                                                                                                                                                                                                          | 10.0464                                   | 8.4744  | 2.7725  |         |   |         |        |        |   |         |        |         |   |        |        |        |   |         |        |         |   |        |        |        |   |        |        |         |   |         |        |        |   |         |        |         |   |         |        |        |    |        |        |        |                                                                                                                                                                                                                                                                                                                                                                                                                                                                                                                                                                                                                                                                                                                                                                                                                      |        |        |        |         |        |        |        |        |         |        |        |         |        |        |        |        |         |        |        |         |         |        |        |        |         |        |        |         |         |         |        |        |         |         |        |         |         |         |        |        |        |        |        |        |         |        |        |   |        |        |        |   |        |        |        |   |        |        |        |   |        |        |        |   |        |        |        |   |        |        |        |   |        |        |        |                                                                                                                                                                                                                                                                                                                                                                                                                                                                                                                                                                                                                                                                                                                                                                                                                                                                                                                                                                                                                                                                                                                                                                                                                                                                                                                                                                                                                                                                                                                                                                                                                                                                                                                                                                                                                                                                                                                                                                                                                                                                                                            |   |         |        |        |   |         |        |        |   |         |        |        |   |        |        |        |   |         |        |        |   |        |        |        |   |        |        |        |   |        |        |        |   |        |        |        |   |        |        |        |   |        |        |        |   |        |        |        |   |        |        |        |   |         |        |        |   |        |        |        |   |         |        |        |   |         |        |        |   |         |        |        |   |         |        |        |   |         |        |        |   |         |        |        |   |        |        |        |   |         |        |        |   |        |        |        |   |        |        |        |   |        |        |        |   |        |        |        |   |        |        |        |   |        |        |        |   |        |        |        |
| B                                                                                                                                                                                                                                                                                                                                                                                                                                                                                                                                                                                                                                                                                                                                                                                                                                                                                                                                                                                                                                                                                                                                                                                                                                                                                                                                                                                                                                                                                                                                                                                                                                                                                                                                                                                                                                                                                                                                                                                                                                                                                                          | 6.4790                                    | 7.8473  | 0.6377  |         |   |         |        |        |   |         |        |         |   |        |        |        |   |         |        |         |   |        |        |        |   |        |        |         |   |         |        |        |   |         |        |         |   |         |        |        |    |        |        |        |                                                                                                                                                                                                                                                                                                                                                                                                                                                                                                                                                                                                                                                                                                                                                                                                                      |        |        |        |         |        |        |        |        |         |        |        |         |        |        |        |        |         |        |        |         |         |        |        |        |         |        |        |         |         |         |        |        |         |         |        |         |         |         |        |        |        |        |        |        |         |        |        |   |        |        |        |   |        |        |        |   |        |        |        |   |        |        |        |   |        |        |        |   |        |        |        |   |        |        |        |                                                                                                                                                                                                                                                                                                                                                                                                                                                                                                                                                                                                                                                                                                                                                                                                                                                                                                                                                                                                                                                                                                                                                                                                                                                                                                                                                                                                                                                                                                                                                                                                                                                                                                                                                                                                                                                                                                                                                                                                                                                                                                            |   |         |        |        |   |         |        |        |   |         |        |        |   |        |        |        |   |         |        |        |   |        |        |        |   |        |        |        |   |        |        |        |   |        |        |        |   |        |        |        |   |        |        |        |   |        |        |        |   |        |        |        |   |         |        |        |   |        |        |        |   |         |        |        |   |         |        |        |   |         |        |        |   |         |        |        |   |         |        |        |   |         |        |        |   |        |        |        |   |         |        |        |   |        |        |        |   |        |        |        |   |        |        |        |   |        |        |        |   |        |        |        |   |        |        |        |   |        |        |        |
| B                                                                                                                                                                                                                                                                                                                                                                                                                                                                                                                                                                                                                                                                                                                                                                                                                                                                                                                                                                                                                                                                                                                                                                                                                                                                                                                                                                                                                                                                                                                                                                                                                                                                                                                                                                                                                                                                                                                                                                                                                                                                                                          | 7.5657                                    | 8.4637  | 2.7702  |         |   |         |        |        |   |         |        |         |   |        |        |        |   |         |        |         |   |        |        |        |   |        |        |         |   |         |        |        |   |         |        |         |   |         |        |        |    |        |        |        |                                                                                                                                                                                                                                                                                                                                                                                                                                                                                                                                                                                                                                                                                                                                                                                                                      |        |        |        |         |        |        |        |        |         |        |        |         |        |        |        |        |         |        |        |         |         |        |        |        |         |        |        |         |         |         |        |        |         |         |        |         |         |         |        |        |        |        |        |        |         |        |        |   |        |        |        |   |        |        |        |   |        |        |        |   |        |        |        |   |        |        |        |   |        |        |        |   |        |        |        |                                                                                                                                                                                                                                                                                                                                                                                                                                                                                                                                                                                                                                                                                                                                                                                                                                                                                                                                                                                                                                                                                                                                                                                                                                                                                                                                                                                                                                                                                                                                                                                                                                                                                                                                                                                                                                                                                                                                                                                                                                                                                                            |   |         |        |        |   |         |        |        |   |         |        |        |   |        |        |        |   |         |        |        |   |        |        |        |   |        |        |        |   |        |        |        |   |        |        |        |   |        |        |        |   |        |        |        |   |        |        |        |   |        |        |        |   |         |        |        |   |        |        |        |   |         |        |        |   |         |        |        |   |         |        |        |   |         |        |        |   |         |        |        |   |         |        |        |   |        |        |        |   |         |        |        |   |        |        |        |   |        |        |        |   |        |        |        |   |        |        |        |   |        |        |        |   |        |        |        |   |        |        |        |
| B                                                                                                                                                                                                                                                                                                                                                                                                                                                                                                                                                                                                                                                                                                                                                                                                                                                                                                                                                                                                                                                                                                                                                                                                                                                                                                                                                                                                                                                                                                                                                                                                                                                                                                                                                                                                                                                                                                                                                                                                                                                                                                          | 5.2410                                    | 5.7102  | 0.6344  |         |   |         |        |        |   |         |        |         |   |        |        |        |   |         |        |         |   |        |        |        |   |        |        |         |   |         |        |        |   |         |        |         |   |         |        |        |    |        |        |        |                                                                                                                                                                                                                                                                                                                                                                                                                                                                                                                                                                                                                                                                                                                                                                                                                      |        |        |        |         |        |        |        |        |         |        |        |         |        |        |        |        |         |        |        |         |         |        |        |        |         |        |        |         |         |         |        |        |         |         |        |         |         |         |        |        |        |        |        |        |         |        |        |   |        |        |        |   |        |        |        |   |        |        |        |   |        |        |        |   |        |        |        |   |        |        |        |   |        |        |        |                                                                                                                                                                                                                                                                                                                                                                                                                                                                                                                                                                                                                                                                                                                                                                                                                                                                                                                                                                                                                                                                                                                                                                                                                                                                                                                                                                                                                                                                                                                                                                                                                                                                                                                                                                                                                                                                                                                                                                                                                                                                                                            |   |         |        |        |   |         |        |        |   |         |        |        |   |        |        |        |   |         |        |        |   |        |        |        |   |        |        |        |   |        |        |        |   |        |        |        |   |        |        |        |   |        |        |        |   |        |        |        |   |        |        |        |   |         |        |        |   |        |        |        |   |         |        |        |   |         |        |        |   |         |        |        |   |         |        |        |   |         |        |        |   |         |        |        |   |        |        |        |   |         |        |        |   |        |        |        |   |        |        |        |   |        |        |        |   |        |        |        |   |        |        |        |   |        |        |        |   |        |        |        |
| B                                                                                                                                                                                                                                                                                                                                                                                                                                                                                                                                                                                                                                                                                                                                                                                                                                                                                                                                                                                                                                                                                                                                                                                                                                                                                                                                                                                                                                                                                                                                                                                                                                                                                                                                                                                                                                                                                                                                                                                                                                                                                                          | 5.6703                                    | 6.8822  | 2.7677  |         |   |         |        |        |   |         |        |         |   |        |        |        |   |         |        |         |   |        |        |        |   |        |        |         |   |         |        |        |   |         |        |         |   |         |        |        |    |        |        |        |                                                                                                                                                                                                                                                                                                                                                                                                                                                                                                                                                                                                                                                                                                                                                                                                                      |        |        |        |         |        |        |        |        |         |        |        |         |        |        |        |        |         |        |        |         |         |        |        |        |         |        |        |         |         |         |        |        |         |         |        |         |         |         |        |        |        |        |        |        |         |        |        |   |        |        |        |   |        |        |        |   |        |        |        |   |        |        |        |   |        |        |        |   |        |        |        |   |        |        |        |                                                                                                                                                                                                                                                                                                                                                                                                                                                                                                                                                                                                                                                                                                                                                                                                                                                                                                                                                                                                                                                                                                                                                                                                                                                                                                                                                                                                                                                                                                                                                                                                                                                                                                                                                                                                                                                                                                                                                                                                                                                                                                            |   |         |        |        |   |         |        |        |   |         |        |        |   |        |        |        |   |         |        |        |   |        |        |        |   |        |        |        |   |        |        |        |   |        |        |        |   |        |        |        |   |        |        |        |   |        |        |        |   |        |        |        |   |         |        |        |   |        |        |        |   |         |        |        |   |         |        |        |   |         |        |        |   |         |        |        |   |         |        |        |   |         |        |        |   |        |        |        |   |         |        |        |   |        |        |        |   |        |        |        |   |        |        |        |   |        |        |        |   |        |        |        |   |        |        |        |   |        |        |        |
| B                                                                                                                                                                                                                                                                                                                                                                                                                                                                                                                                                                                                                                                                                                                                                                                                                                                                                                                                                                                                                                                                                                                                                                                                                                                                                                                                                                                                                                                                                                                                                                                                                                                                                                                                                                                                                                                                                                                                                                                                                                                                                                          | 5.6579                                    | 3.2777  | 0.6348  |         |   |         |        |        |   |         |        |         |   |        |        |        |   |         |        |         |   |        |        |        |   |        |        |         |   |         |        |        |   |         |        |         |   |         |        |        |    |        |        |        |                                                                                                                                                                                                                                                                                                                                                                                                                                                                                                                                                                                                                                                                                                                                                                                                                      |        |        |        |         |        |        |        |        |         |        |        |         |        |        |        |        |         |        |        |         |         |        |        |        |         |        |        |         |         |         |        |        |         |         |        |         |         |         |        |        |        |        |        |        |         |        |        |   |        |        |        |   |        |        |        |   |        |        |        |   |        |        |        |   |        |        |        |   |        |        |        |   |        |        |        |                                                                                                                                                                                                                                                                                                                                                                                                                                                                                                                                                                                                                                                                                                                                                                                                                                                                                                                                                                                                                                                                                                                                                                                                                                                                                                                                                                                                                                                                                                                                                                                                                                                                                                                                                                                                                                                                                                                                                                                                                                                                                                            |   |         |        |        |   |         |        |        |   |         |        |        |   |        |        |        |   |         |        |        |   |        |        |        |   |        |        |        |   |        |        |        |   |        |        |        |   |        |        |        |   |        |        |        |   |        |        |        |   |        |        |        |   |         |        |        |   |        |        |        |   |         |        |        |   |         |        |        |   |         |        |        |   |         |        |        |   |         |        |        |   |         |        |        |   |        |        |        |   |         |        |        |   |        |        |        |   |        |        |        |   |        |        |        |   |        |        |        |   |        |        |        |   |        |        |        |   |        |        |        |
| B                                                                                                                                                                                                                                                                                                                                                                                                                                                                                                                                                                                                                                                                                                                                                                                                                                                                                                                                                                                                                                                                                                                                                                                                                                                                                                                                                                                                                                                                                                                                                                                                                                                                                                                                                                                                                                                                                                                                                                                                                                                                                                          | 5.2337                                    | 4.4566  | 2.7673  |         |   |         |        |        |   |         |        |         |   |        |        |        |   |         |        |         |   |        |        |        |   |        |        |         |   |         |        |        |   |         |        |         |   |         |        |        |    |        |        |        |                                                                                                                                                                                                                                                                                                                                                                                                                                                                                                                                                                                                                                                                                                                                                                                                                      |        |        |        |         |        |        |        |        |         |        |        |         |        |        |        |        |         |        |        |         |         |        |        |        |         |        |        |         |         |         |        |        |         |         |        |         |         |         |        |        |        |        |        |        |         |        |        |   |        |        |        |   |        |        |        |   |        |        |        |   |        |        |        |   |        |        |        |   |        |        |        |   |        |        |        |                                                                                                                                                                                                                                                                                                                                                                                                                                                                                                                                                                                                                                                                                                                                                                                                                                                                                                                                                                                                                                                                                                                                                                                                                                                                                                                                                                                                                                                                                                                                                                                                                                                                                                                                                                                                                                                                                                                                                                                                                                                                                                            |   |         |        |        |   |         |        |        |   |         |        |        |   |        |        |        |   |         |        |        |   |        |        |        |   |        |        |        |   |        |        |        |   |        |        |        |   |        |        |        |   |        |        |        |   |        |        |        |   |        |        |        |   |         |        |        |   |        |        |        |   |         |        |        |   |         |        |        |   |         |        |        |   |         |        |        |   |         |        |        |   |         |        |        |   |        |        |        |   |         |        |        |   |        |        |        |   |        |        |        |   |        |        |        |   |        |        |        |   |        |        |        |   |        |        |        |   |        |        |        |
| B                                                                                                                                                                                                                                                                                                                                                                                                                                                                                                                                                                                                                                                                                                                                                                                                                                                                                                                                                                                                                                                                                                                                                                                                                                                                                                                                                                                                                                                                                                                                                                                                                                                                                                                                                                                                                                                                                                                                                                                                                                                                                                          | 7.5526                                    | 1.6952  | 0.6389  |         |   |         |        |        |   |         |        |         |   |        |        |        |   |         |        |         |   |        |        |        |   |        |        |         |   |         |        |        |   |         |        |         |   |         |        |        |    |        |        |        |                                                                                                                                                                                                                                                                                                                                                                                                                                                                                                                                                                                                                                                                                                                                                                                                                      |        |        |        |         |        |        |        |        |         |        |        |         |        |        |        |        |         |        |        |         |         |        |        |        |         |        |        |         |         |         |        |        |         |         |        |         |         |         |        |        |        |        |        |        |         |        |        |   |        |        |        |   |        |        |        |   |        |        |        |   |        |        |        |   |        |        |        |   |        |        |        |   |        |        |        |                                                                                                                                                                                                                                                                                                                                                                                                                                                                                                                                                                                                                                                                                                                                                                                                                                                                                                                                                                                                                                                                                                                                                                                                                                                                                                                                                                                                                                                                                                                                                                                                                                                                                                                                                                                                                                                                                                                                                                                                                                                                                                            |   |         |        |        |   |         |        |        |   |         |        |        |   |        |        |        |   |         |        |        |   |        |        |        |   |        |        |        |   |        |        |        |   |        |        |        |   |        |        |        |   |        |        |        |   |        |        |        |   |        |        |        |   |         |        |        |   |        |        |        |   |         |        |        |   |         |        |        |   |         |        |        |   |         |        |        |   |         |        |        |   |         |        |        |   |        |        |        |   |         |        |        |   |        |        |        |   |        |        |        |   |        |        |        |   |        |        |        |   |        |        |        |   |        |        |        |   |        |        |        |
| B                                                                                                                                                                                                                                                                                                                                                                                                                                                                                                                                                                                                                                                                                                                                                                                                                                                                                                                                                                                                                                                                                                                                                                                                                                                                                                                                                                                                                                                                                                                                                                                                                                                                                                                                                                                                                                                                                                                                                                                                                                                                                                          | 6.4615                                    | 2.3233  | 2.7688  |         |   |         |        |        |   |         |        |         |   |        |        |        |   |         |        |         |   |        |        |        |   |        |        |         |   |         |        |        |   |         |        |         |   |         |        |        |    |        |        |        |                                                                                                                                                                                                                                                                                                                                                                                                                                                                                                                                                                                                                                                                                                                                                                                                                      |        |        |        |         |        |        |        |        |         |        |        |         |        |        |        |        |         |        |        |         |         |        |        |        |         |        |        |         |         |         |        |        |         |         |        |         |         |         |        |        |        |        |        |        |         |        |        |   |        |        |        |   |        |        |        |   |        |        |        |   |        |        |        |   |        |        |        |   |        |        |        |   |        |        |        |                                                                                                                                                                                                                                                                                                                                                                                                                                                                                                                                                                                                                                                                                                                                                                                                                                                                                                                                                                                                                                                                                                                                                                                                                                                                                                                                                                                                                                                                                                                                                                                                                                                                                                                                                                                                                                                                                                                                                                                                                                                                                                            |   |         |        |        |   |         |        |        |   |         |        |        |   |        |        |        |   |         |        |        |   |        |        |        |   |        |        |        |   |        |        |        |   |        |        |        |   |        |        |        |   |        |        |        |   |        |        |        |   |        |        |        |   |         |        |        |   |        |        |        |   |         |        |        |   |         |        |        |   |         |        |        |   |         |        |        |   |         |        |        |   |         |        |        |   |        |        |        |   |         |        |        |   |        |        |        |   |        |        |        |   |        |        |        |   |        |        |        |   |        |        |        |   |        |        |        |   |        |        |        |
| B                                                                                                                                                                                                                                                                                                                                                                                                                                                                                                                                                                                                                                                                                                                                                                                                                                                                                                                                                                                                                                                                                                                                                                                                                                                                                                                                                                                                                                                                                                                                                                                                                                                                                                                                                                                                                                                                                                                                                                                                                                                                                                          | 10.0262                                   | 1.7179  | 0.6417  |         |   |         |        |        |   |         |        |         |   |        |        |        |   |         |        |         |   |        |        |        |   |        |        |         |   |         |        |        |   |         |        |         |   |         |        |        |    |        |        |        |                                                                                                                                                                                                                                                                                                                                                                                                                                                                                                                                                                                                                                                                                                                                                                                                                      |        |        |        |         |        |        |        |        |         |        |        |         |        |        |        |        |         |        |        |         |         |        |        |        |         |        |        |         |         |         |        |        |         |         |        |         |         |         |        |        |        |        |        |        |         |        |        |   |        |        |        |   |        |        |        |   |        |        |        |   |        |        |        |   |        |        |        |   |        |        |        |   |        |        |        |                                                                                                                                                                                                                                                                                                                                                                                                                                                                                                                                                                                                                                                                                                                                                                                                                                                                                                                                                                                                                                                                                                                                                                                                                                                                                                                                                                                                                                                                                                                                                                                                                                                                                                                                                                                                                                                                                                                                                                                                                                                                                                            |   |         |        |        |   |         |        |        |   |         |        |        |   |        |        |        |   |         |        |        |   |        |        |        |   |        |        |        |   |        |        |        |   |        |        |        |   |        |        |        |   |        |        |        |   |        |        |        |   |        |        |        |   |         |        |        |   |        |        |        |   |         |        |        |   |         |        |        |   |         |        |        |   |         |        |        |   |         |        |        |   |         |        |        |   |        |        |        |   |         |        |        |   |        |        |        |   |        |        |        |   |        |        |        |   |        |        |        |   |        |        |        |   |        |        |        |   |        |        |        |
| B                                                                                                                                                                                                                                                                                                                                                                                                                                                                                                                                                                                                                                                                                                                                                                                                                                                                                                                                                                                                                                                                                                                                                                                                                                                                                                                                                                                                                                                                                                                                                                                                                                                                                                                                                                                                                                                                                                                                                                                                                                                                                                          | 8.7847                                    | 1.4956  | 2.7704  |         |   |         |        |        |   |         |        |         |   |        |        |        |   |         |        |         |   |        |        |        |   |        |        |         |   |         |        |        |   |         |        |         |   |         |        |        |    |        |        |        |                                                                                                                                                                                                                                                                                                                                                                                                                                                                                                                                                                                                                                                                                                                                                                                                                      |        |        |        |         |        |        |        |        |         |        |        |         |        |        |        |        |         |        |        |         |         |        |        |        |         |        |        |         |         |         |        |        |         |         |        |         |         |         |        |        |        |        |        |        |         |        |        |   |        |        |        |   |        |        |        |   |        |        |        |   |        |        |        |   |        |        |        |   |        |        |        |   |        |        |        |                                                                                                                                                                                                                                                                                                                                                                                                                                                                                                                                                                                                                                                                                                                                                                                                                                                                                                                                                                                                                                                                                                                                                                                                                                                                                                                                                                                                                                                                                                                                                                                                                                                                                                                                                                                                                                                                                                                                                                                                                                                                                                            |   |         |        |        |   |         |        |        |   |         |        |        |   |        |        |        |   |         |        |        |   |        |        |        |   |        |        |        |   |        |        |        |   |        |        |        |   |        |        |        |   |        |        |        |   |        |        |        |   |        |        |        |   |         |        |        |   |        |        |        |   |         |        |        |   |         |        |        |   |         |        |        |   |         |        |        |   |         |        |        |   |         |        |        |   |        |        |        |   |         |        |        |   |        |        |        |   |        |        |        |   |        |        |        |   |        |        |        |   |        |        |        |   |        |        |        |   |        |        |        |
| B                                                                                                                                                                                                                                                                                                                                                                                                                                                                                                                                                                                                                                                                                                                                                                                                                                                                                                                                                                                                                                                                                                                                                                                                                                                                                                                                                                                                                                                                                                                                                                                                                                                                                                                                                                                                                                                                                                                                                                                                                                                                                                          | 11.9316                                   | 3.3008  | 0.6434  |         |   |         |        |        |   |         |        |         |   |        |        |        |   |         |        |         |   |        |        |        |   |        |        |         |   |         |        |        |   |         |        |         |   |         |        |        |    |        |        |        |                                                                                                                                                                                                                                                                                                                                                                                                                                                                                                                                                                                                                                                                                                                                                                                                                      |        |        |        |         |        |        |        |        |         |        |        |         |        |        |        |        |         |        |        |         |         |        |        |        |         |        |        |         |         |         |        |        |         |         |        |         |         |         |        |        |        |        |        |        |         |        |        |   |        |        |        |   |        |        |        |   |        |        |        |   |        |        |        |   |        |        |        |   |        |        |        |   |        |        |        |                                                                                                                                                                                                                                                                                                                                                                                                                                                                                                                                                                                                                                                                                                                                                                                                                                                                                                                                                                                                                                                                                                                                                                                                                                                                                                                                                                                                                                                                                                                                                                                                                                                                                                                                                                                                                                                                                                                                                                                                                                                                                                            |   |         |        |        |   |         |        |        |   |         |        |        |   |        |        |        |   |         |        |        |   |        |        |        |   |        |        |        |   |        |        |        |   |        |        |        |   |        |        |        |   |        |        |        |   |        |        |        |   |        |        |        |   |         |        |        |   |        |        |        |   |         |        |        |   |         |        |        |   |         |        |        |   |         |        |        |   |         |        |        |   |         |        |        |   |        |        |        |   |         |        |        |   |        |        |        |   |        |        |        |   |        |        |        |   |        |        |        |   |        |        |        |   |        |        |        |   |        |        |        |
| B                                                                                                                                                                                                                                                                                                                                                                                                                                                                                                                                                                                                                                                                                                                                                                                                                                                                                                                                                                                                                                                                                                                                                                                                                                                                                                                                                                                                                                                                                                                                                                                                                                                                                                                                                                                                                                                                                                                                                                                                                                                                                                          | 11.1119                                   | 2.3493  | 2.7736  |         |   |         |        |        |   |         |        |         |   |        |        |        |   |         |        |         |   |        |        |        |   |        |        |         |   |         |        |        |   |         |        |         |   |         |        |        |    |        |        |        |                                                                                                                                                                                                                                                                                                                                                                                                                                                                                                                                                                                                                                                                                                                                                                                                                      |        |        |        |         |        |        |        |        |         |        |        |         |        |        |        |        |         |        |        |         |         |        |        |        |         |        |        |         |         |         |        |        |         |         |        |         |         |         |        |        |        |        |        |        |         |        |        |   |        |        |        |   |        |        |        |   |        |        |        |   |        |        |        |   |        |        |        |   |        |        |        |   |        |        |        |                                                                                                                                                                                                                                                                                                                                                                                                                                                                                                                                                                                                                                                                                                                                                                                                                                                                                                                                                                                                                                                                                                                                                                                                                                                                                                                                                                                                                                                                                                                                                                                                                                                                                                                                                                                                                                                                                                                                                                                                                                                                                                            |   |         |        |        |   |         |        |        |   |         |        |        |   |        |        |        |   |         |        |        |   |        |        |        |   |        |        |        |   |        |        |        |   |        |        |        |   |        |        |        |   |        |        |        |   |        |        |        |   |        |        |        |   |         |        |        |   |        |        |        |   |         |        |        |   |         |        |        |   |         |        |        |   |         |        |        |   |         |        |        |   |         |        |        |   |        |        |        |   |         |        |        |   |        |        |        |   |        |        |        |   |        |        |        |   |        |        |        |   |        |        |        |   |        |        |        |   |        |        |        |
| B                                                                                                                                                                                                                                                                                                                                                                                                                                                                                                                                                                                                                                                                                                                                                                                                                                                                                                                                                                                                                                                                                                                                                                                                                                                                                                                                                                                                                                                                                                                                                                                                                                                                                                                                                                                                                                                                                                                                                                                                                                                                                                          | 12.3922                                   | 4.4768  | 2.7669  |         |   |         |        |        |   |         |        |         |   |        |        |        |   |         |        |         |   |        |        |        |   |        |        |         |   |         |        |        |   |         |        |         |   |         |        |        |    |        |        |        |                                                                                                                                                                                                                                                                                                                                                                                                                                                                                                                                                                                                                                                                                                                                                                                                                      |        |        |        |         |        |        |        |        |         |        |        |         |        |        |        |        |         |        |        |         |         |        |        |        |         |        |        |         |         |         |        |        |         |         |        |         |         |         |        |        |        |        |        |        |         |        |        |   |        |        |        |   |        |        |        |   |        |        |        |   |        |        |        |   |        |        |        |   |        |        |        |   |        |        |        |                                                                                                                                                                                                                                                                                                                                                                                                                                                                                                                                                                                                                                                                                                                                                                                                                                                                                                                                                                                                                                                                                                                                                                                                                                                                                                                                                                                                                                                                                                                                                                                                                                                                                                                                                                                                                                                                                                                                                                                                                                                                                                            |   |         |        |        |   |         |        |        |   |         |        |        |   |        |        |        |   |         |        |        |   |        |        |        |   |        |        |        |   |        |        |        |   |        |        |        |   |        |        |        |   |        |        |        |   |        |        |        |   |        |        |        |   |         |        |        |   |        |        |        |   |         |        |        |   |         |        |        |   |         |        |        |   |         |        |        |   |         |        |        |   |         |        |        |   |        |        |        |   |         |        |        |   |        |        |        |   |        |        |        |   |        |        |        |   |        |        |        |   |        |        |        |   |        |        |        |   |        |        |        |
| B                                                                                                                                                                                                                                                                                                                                                                                                                                                                                                                                                                                                                                                                                                                                                                                                                                                                                                                                                                                                                                                                                                                                                                                                                                                                                                                                                                                                                                                                                                                                                                                                                                                                                                                                                                                                                                                                                                                                                                                                                                                                                                          | 12.4496                                   | 5.7478  | 4.8832  |         |   |         |        |        |   |         |        |         |   |        |        |        |   |         |        |         |   |        |        |        |   |        |        |         |   |         |        |        |   |         |        |         |   |         |        |        |    |        |        |        |                                                                                                                                                                                                                                                                                                                                                                                                                                                                                                                                                                                                                                                                                                                                                                                                                      |        |        |        |         |        |        |        |        |         |        |        |         |        |        |        |        |         |        |        |         |         |        |        |        |         |        |        |         |         |         |        |        |         |         |        |         |         |         |        |        |        |        |        |        |         |        |        |   |        |        |        |   |        |        |        |   |        |        |        |   |        |        |        |   |        |        |        |   |        |        |        |   |        |        |        |                                                                                                                                                                                                                                                                                                                                                                                                                                                                                                                                                                                                                                                                                                                                                                                                                                                                                                                                                                                                                                                                                                                                                                                                                                                                                                                                                                                                                                                                                                                                                                                                                                                                                                                                                                                                                                                                                                                                                                                                                                                                                                            |   |         |        |        |   |         |        |        |   |         |        |        |   |        |        |        |   |         |        |        |   |        |        |        |   |        |        |        |   |        |        |        |   |        |        |        |   |        |        |        |   |        |        |        |   |        |        |        |   |        |        |        |   |         |        |        |   |        |        |        |   |         |        |        |   |         |        |        |   |         |        |        |   |         |        |        |   |         |        |        |   |         |        |        |   |        |        |        |   |         |        |        |   |        |        |        |   |        |        |        |   |        |        |        |   |        |        |        |   |        |        |        |   |        |        |        |   |        |        |        |
| B                                                                                                                                                                                                                                                                                                                                                                                                                                                                                                                                                                                                                                                                                                                                                                                                                                                                                                                                                                                                                                                                                                                                                                                                                                                                                                                                                                                                                                                                                                                                                                                                                                                                                                                                                                                                                                                                                                                                                                                                                                                                                                          | 11.1586                                   | 7.8560  | 4.8944  |         |   |         |        |        |   |         |        |         |   |        |        |        |   |         |        |         |   |        |        |        |   |        |        |         |   |         |        |        |   |         |        |         |   |         |        |        |    |        |        |        |                                                                                                                                                                                                                                                                                                                                                                                                                                                                                                                                                                                                                                                                                                                                                                                                                      |        |        |        |         |        |        |        |        |         |        |        |         |        |        |        |        |         |        |        |         |         |        |        |        |         |        |        |         |         |         |        |        |         |         |        |         |         |         |        |        |        |        |        |        |         |        |        |   |        |        |        |   |        |        |        |   |        |        |        |   |        |        |        |   |        |        |        |   |        |        |        |   |        |        |        |                                                                                                                                                                                                                                                                                                                                                                                                                                                                                                                                                                                                                                                                                                                                                                                                                                                                                                                                                                                                                                                                                                                                                                                                                                                                                                                                                                                                                                                                                                                                                                                                                                                                                                                                                                                                                                                                                                                                                                                                                                                                                                            |   |         |        |        |   |         |        |        |   |         |        |        |   |        |        |        |   |         |        |        |   |        |        |        |   |        |        |        |   |        |        |        |   |        |        |        |   |        |        |        |   |        |        |        |   |        |        |        |   |        |        |        |   |         |        |        |   |        |        |        |   |         |        |        |   |         |        |        |   |         |        |        |   |         |        |        |   |         |        |        |   |         |        |        |   |        |        |        |   |         |        |        |   |        |        |        |   |        |        |        |   |        |        |        |   |        |        |        |   |        |        |        |   |        |        |        |   |        |        |        |
| B                                                                                                                                                                                                                                                                                                                                                                                                                                                                                                                                                                                                                                                                                                                                                                                                                                                                                                                                                                                                                                                                                                                                                                                                                                                                                                                                                                                                                                                                                                                                                                                                                                                                                                                                                                                                                                                                                                                                                                                                                                                                                                          | 12.0249                                   | 6.9048  | 7.0364  |         |   |         |        |        |   |         |        |         |   |        |        |        |   |         |        |         |   |        |        |        |   |        |        |         |   |         |        |        |   |         |        |         |   |         |        |        |    |        |        |        |                                                                                                                                                                                                                                                                                                                                                                                                                                                                                                                                                                                                                                                                                                                                                                                                                      |        |        |        |         |        |        |        |        |         |        |        |         |        |        |        |        |         |        |        |         |         |        |        |        |         |        |        |         |         |         |        |        |         |         |        |         |         |         |        |        |        |        |        |        |         |        |        |   |        |        |        |   |        |        |        |   |        |        |        |   |        |        |        |   |        |        |        |   |        |        |        |   |        |        |        |                                                                                                                                                                                                                                                                                                                                                                                                                                                                                                                                                                                                                                                                                                                                                                                                                                                                                                                                                                                                                                                                                                                                                                                                                                                                                                                                                                                                                                                                                                                                                                                                                                                                                                                                                                                                                                                                                                                                                                                                                                                                                                            |   |         |        |        |   |         |        |        |   |         |        |        |   |        |        |        |   |         |        |        |   |        |        |        |   |        |        |        |   |        |        |        |   |        |        |        |   |        |        |        |   |        |        |        |   |        |        |        |   |        |        |        |   |         |        |        |   |        |        |        |   |         |        |        |   |         |        |        |   |         |        |        |   |         |        |        |   |         |        |        |   |         |        |        |   |        |        |        |   |         |        |        |   |        |        |        |   |        |        |        |   |        |        |        |   |        |        |        |   |        |        |        |   |        |        |        |   |        |        |        |
| B                                                                                                                                                                                                                                                                                                                                                                                                                                                                                                                                                                                                                                                                                                                                                                                                                                                                                                                                                                                                                                                                                                                                                                                                                                                                                                                                                                                                                                                                                                                                                                                                                                                                                                                                                                                                                                                                                                                                                                                                                                                                                                          | 8.7906                                    | 8.6572  | 4.8991  |         |   |         |        |        |   |         |        |         |   |        |        |        |   |         |        |         |   |        |        |        |   |        |        |         |   |         |        |        |   |         |        |         |   |         |        |        |    |        |        |        |                                                                                                                                                                                                                                                                                                                                                                                                                                                                                                                                                                                                                                                                                                                                                                                                                      |        |        |        |         |        |        |        |        |         |        |        |         |        |        |        |        |         |        |        |         |         |        |        |        |         |        |        |         |         |         |        |        |         |         |        |         |         |         |        |        |        |        |        |        |         |        |        |   |        |        |        |   |        |        |        |   |        |        |        |   |        |        |        |   |        |        |        |   |        |        |        |   |        |        |        |                                                                                                                                                                                                                                                                                                                                                                                                                                                                                                                                                                                                                                                                                                                                                                                                                                                                                                                                                                                                                                                                                                                                                                                                                                                                                                                                                                                                                                                                                                                                                                                                                                                                                                                                                                                                                                                                                                                                                                                                                                                                                                            |   |         |        |        |   |         |        |        |   |         |        |        |   |        |        |        |   |         |        |        |   |        |        |        |   |        |        |        |   |        |        |        |   |        |        |        |   |        |        |        |   |        |        |        |   |        |        |        |   |        |        |        |   |         |        |        |   |        |        |        |   |         |        |        |   |         |        |        |   |         |        |        |   |         |        |        |   |         |        |        |   |         |        |        |   |        |        |        |   |         |        |        |   |        |        |        |   |        |        |        |   |        |        |        |   |        |        |        |   |        |        |        |   |        |        |        |   |        |        |        |
| B                                                                                                                                                                                                                                                                                                                                                                                                                                                                                                                                                                                                                                                                                                                                                                                                                                                                                                                                                                                                                                                                                                                                                                                                                                                                                                                                                                                                                                                                                                                                                                                                                                                                                                                                                                                                                                                                                                                                                                                                                                                                                                          | 10.0370                                   | 8.4471  | 7.0369  |         |   |         |        |        |   |         |        |         |   |        |        |        |   |         |        |         |   |        |        |        |   |        |        |         |   |         |        |        |   |         |        |         |   |         |        |        |    |        |        |        |                                                                                                                                                                                                                                                                                                                                                                                                                                                                                                                                                                                                                                                                                                                                                                                                                      |        |        |        |         |        |        |        |        |         |        |        |         |        |        |        |        |         |        |        |         |         |        |        |        |         |        |        |         |         |         |        |        |         |         |        |         |         |         |        |        |        |        |        |        |         |        |        |   |        |        |        |   |        |        |        |   |        |        |        |   |        |        |        |   |        |        |        |   |        |        |        |   |        |        |        |                                                                                                                                                                                                                                                                                                                                                                                                                                                                                                                                                                                                                                                                                                                                                                                                                                                                                                                                                                                                                                                                                                                                                                                                                                                                                                                                                                                                                                                                                                                                                                                                                                                                                                                                                                                                                                                                                                                                                                                                                                                                                                            |   |         |        |        |   |         |        |        |   |         |        |        |   |        |        |        |   |         |        |        |   |        |        |        |   |        |        |        |   |        |        |        |   |        |        |        |   |        |        |        |   |        |        |        |   |        |        |        |   |        |        |        |   |         |        |        |   |        |        |        |   |         |        |        |   |         |        |        |   |         |        |        |   |         |        |        |   |         |        |        |   |         |        |        |   |        |        |        |   |         |        |        |   |        |        |        |   |        |        |        |   |        |        |        |   |        |        |        |   |        |        |        |   |        |        |        |   |        |        |        |
| B                                                                                                                                                                                                                                                                                                                                                                                                                                                                                                                                                                                                                                                                                                                                                                                                                                                                                                                                                                                                                                                                                                                                                                                                                                                                                                                                                                                                                                                                                                                                                                                                                                                                                                                                                                                                                                                                                                                                                                                                                                                                                                          | 6.4667                                    | 7.8297  | 4.9003  |         |   |         |        |        |   |         |        |         |   |        |        |        |   |         |        |         |   |        |        |        |   |        |        |         |   |         |        |        |   |         |        |         |   |         |        |        |    |        |        |        |                                                                                                                                                                                                                                                                                                                                                                                                                                                                                                                                                                                                                                                                                                                                                                                                                      |        |        |        |         |        |        |        |        |         |        |        |         |        |        |        |        |         |        |        |         |         |        |        |        |         |        |        |         |         |         |        |        |         |         |        |         |         |         |        |        |        |        |        |        |         |        |        |   |        |        |        |   |        |        |        |   |        |        |        |   |        |        |        |   |        |        |        |   |        |        |        |   |        |        |        |                                                                                                                                                                                                                                                                                                                                                                                                                                                                                                                                                                                                                                                                                                                                                                                                                                                                                                                                                                                                                                                                                                                                                                                                                                                                                                                                                                                                                                                                                                                                                                                                                                                                                                                                                                                                                                                                                                                                                                                                                                                                                                            |   |         |        |        |   |         |        |        |   |         |        |        |   |        |        |        |   |         |        |        |   |        |        |        |   |        |        |        |   |        |        |        |   |        |        |        |   |        |        |        |   |        |        |        |   |        |        |        |   |        |        |        |   |         |        |        |   |        |        |        |   |         |        |        |   |         |        |        |   |         |        |        |   |         |        |        |   |         |        |        |   |         |        |        |   |        |        |        |   |         |        |        |   |        |        |        |   |        |        |        |   |        |        |        |   |        |        |        |   |        |        |        |   |        |        |        |   |        |        |        |
| B                                                                                                                                                                                                                                                                                                                                                                                                                                                                                                                                                                                                                                                                                                                                                                                                                                                                                                                                                                                                                                                                                                                                                                                                                                                                                                                                                                                                                                                                                                                                                                                                                                                                                                                                                                                                                                                                                                                                                                                                                                                                                                          | 7.5558                                    | 8.4483  | 7.0267  |         |   |         |        |        |   |         |        |         |   |        |        |        |   |         |        |         |   |        |        |        |   |        |        |         |   |         |        |        |   |         |        |         |   |         |        |        |    |        |        |        |                                                                                                                                                                                                                                                                                                                                                                                                                                                                                                                                                                                                                                                                                                                                                                                                                      |        |        |        |         |        |        |        |        |         |        |        |         |        |        |        |        |         |        |        |         |         |        |        |        |         |        |        |         |         |         |        |        |         |         |        |         |         |         |        |        |        |        |        |        |         |        |        |   |        |        |        |   |        |        |        |   |        |        |        |   |        |        |        |   |        |        |        |   |        |        |        |   |        |        |        |                                                                                                                                                                                                                                                                                                                                                                                                                                                                                                                                                                                                                                                                                                                                                                                                                                                                                                                                                                                                                                                                                                                                                                                                                                                                                                                                                                                                                                                                                                                                                                                                                                                                                                                                                                                                                                                                                                                                                                                                                                                                                                            |   |         |        |        |   |         |        |        |   |         |        |        |   |        |        |        |   |         |        |        |   |        |        |        |   |        |        |        |   |        |        |        |   |        |        |        |   |        |        |        |   |        |        |        |   |        |        |        |   |        |        |        |   |         |        |        |   |        |        |        |   |         |        |        |   |         |        |        |   |         |        |        |   |         |        |        |   |         |        |        |   |         |        |        |   |        |        |        |   |         |        |        |   |        |        |        |   |        |        |        |   |        |        |        |   |        |        |        |   |        |        |        |   |        |        |        |   |        |        |        |
| B                                                                                                                                                                                                                                                                                                                                                                                                                                                                                                                                                                                                                                                                                                                                                                                                                                                                                                                                                                                                                                                                                                                                                                                                                                                                                                                                                                                                                                                                                                                                                                                                                                                                                                                                                                                                                                                                                                                                                                                                                                                                                                          | 5.2271                                    | 5.7020  | 4.9018  |         |   |         |        |        |   |         |        |         |   |        |        |        |   |         |        |         |   |        |        |        |   |        |        |         |   |         |        |        |   |         |        |         |   |         |        |        |    |        |        |        |                                                                                                                                                                                                                                                                                                                                                                                                                                                                                                                                                                                                                                                                                                                                                                                                                      |        |        |        |         |        |        |        |        |         |        |        |         |        |        |        |        |         |        |        |         |         |        |        |        |         |        |        |         |         |         |        |        |         |         |        |         |         |         |        |        |        |        |        |        |         |        |        |   |        |        |        |   |        |        |        |   |        |        |        |   |        |        |        |   |        |        |        |   |        |        |        |   |        |        |        |                                                                                                                                                                                                                                                                                                                                                                                                                                                                                                                                                                                                                                                                                                                                                                                                                                                                                                                                                                                                                                                                                                                                                                                                                                                                                                                                                                                                                                                                                                                                                                                                                                                                                                                                                                                                                                                                                                                                                                                                                                                                                                            |   |         |        |        |   |         |        |        |   |         |        |        |   |        |        |        |   |         |        |        |   |        |        |        |   |        |        |        |   |        |        |        |   |        |        |        |   |        |        |        |   |        |        |        |   |        |        |        |   |        |        |        |   |         |        |        |   |        |        |        |   |         |        |        |   |         |        |        |   |         |        |        |   |         |        |        |   |         |        |        |   |         |        |        |   |        |        |        |   |         |        |        |   |        |        |        |   |        |        |        |   |        |        |        |   |        |        |        |   |        |        |        |   |        |        |        |   |        |        |        |
| B                                                                                                                                                                                                                                                                                                                                                                                                                                                                                                                                                                                                                                                                                                                                                                                                                                                                                                                                                                                                                                                                                                                                                                                                                                                                                                                                                                                                                                                                                                                                                                                                                                                                                                                                                                                                                                                                                                                                                                                                                                                                                                          | 5.6775                                    | 6.8686  | 7.0230  |         |   |         |        |        |   |         |        |         |   |        |        |        |   |         |        |         |   |        |        |        |   |        |        |         |   |         |        |        |   |         |        |         |   |         |        |        |    |        |        |        |                                                                                                                                                                                                                                                                                                                                                                                                                                                                                                                                                                                                                                                                                                                                                                                                                      |        |        |        |         |        |        |        |        |         |        |        |         |        |        |        |        |         |        |        |         |         |        |        |        |         |        |        |         |         |         |        |        |         |         |        |         |         |         |        |        |        |        |        |        |         |        |        |   |        |        |        |   |        |        |        |   |        |        |        |   |        |        |        |   |        |        |        |   |        |        |        |   |        |        |        |                                                                                                                                                                                                                                                                                                                                                                                                                                                                                                                                                                                                                                                                                                                                                                                                                                                                                                                                                                                                                                                                                                                                                                                                                                                                                                                                                                                                                                                                                                                                                                                                                                                                                                                                                                                                                                                                                                                                                                                                                                                                                                            |   |         |        |        |   |         |        |        |   |         |        |        |   |        |        |        |   |         |        |        |   |        |        |        |   |        |        |        |   |        |        |        |   |        |        |        |   |        |        |        |   |        |        |        |   |        |        |        |   |        |        |        |   |         |        |        |   |        |        |        |   |         |        |        |   |         |        |        |   |         |        |        |   |         |        |        |   |         |        |        |   |         |        |        |   |        |        |        |   |         |        |        |   |        |        |        |   |        |        |        |   |        |        |        |   |        |        |        |   |        |        |        |   |        |        |        |   |        |        |        |
| B                                                                                                                                                                                                                                                                                                                                                                                                                                                                                                                                                                                                                                                                                                                                                                                                                                                                                                                                                                                                                                                                                                                                                                                                                                                                                                                                                                                                                                                                                                                                                                                                                                                                                                                                                                                                                                                                                                                                                                                                                                                                                                          | 5.6468                                    | 3.2819  | 4.9021  |         |   |         |        |        |   |         |        |         |   |        |        |        |   |         |        |         |   |        |        |        |   |        |        |         |   |         |        |        |   |         |        |         |   |         |        |        |    |        |        |        |                                                                                                                                                                                                                                                                                                                                                                                                                                                                                                                                                                                                                                                                                                                                                                                                                      |        |        |        |         |        |        |        |        |         |        |        |         |        |        |        |        |         |        |        |         |         |        |        |        |         |        |        |         |         |         |        |        |         |         |        |         |         |         |        |        |        |        |        |        |         |        |        |   |        |        |        |   |        |        |        |   |        |        |        |   |        |        |        |   |        |        |        |   |        |        |        |   |        |        |        |                                                                                                                                                                                                                                                                                                                                                                                                                                                                                                                                                                                                                                                                                                                                                                                                                                                                                                                                                                                                                                                                                                                                                                                                                                                                                                                                                                                                                                                                                                                                                                                                                                                                                                                                                                                                                                                                                                                                                                                                                                                                                                            |   |         |        |        |   |         |        |        |   |         |        |        |   |        |        |        |   |         |        |        |   |        |        |        |   |        |        |        |   |        |        |        |   |        |        |        |   |        |        |        |   |        |        |        |   |        |        |        |   |        |        |        |   |         |        |        |   |        |        |        |   |         |        |        |   |         |        |        |   |         |        |        |   |         |        |        |   |         |        |        |   |         |        |        |   |        |        |        |   |         |        |        |   |        |        |        |   |        |        |        |   |        |        |        |   |        |        |        |   |        |        |        |   |        |        |        |   |        |        |        |
| B                                                                                                                                                                                                                                                                                                                                                                                                                                                                                                                                                                                                                                                                                                                                                                                                                                                                                                                                                                                                                                                                                                                                                                                                                                                                                                                                                                                                                                                                                                                                                                                                                                                                                                                                                                                                                                                                                                                                                                                                                                                                                                          | 5.2713                                    | 4.4604  | 7.0199  |         |   |         |        |        |   |         |        |         |   |        |        |        |   |         |        |         |   |        |        |        |   |        |        |         |   |         |        |        |   |         |        |         |   |         |        |        |    |        |        |        |                                                                                                                                                                                                                                                                                                                                                                                                                                                                                                                                                                                                                                                                                                                                                                                                                      |        |        |        |         |        |        |        |        |         |        |        |         |        |        |        |        |         |        |        |         |         |        |        |        |         |        |        |         |         |         |        |        |         |         |        |         |         |         |        |        |        |        |        |        |         |        |        |   |        |        |        |   |        |        |        |   |        |        |        |   |        |        |        |   |        |        |        |   |        |        |        |   |        |        |        |                                                                                                                                                                                                                                                                                                                                                                                                                                                                                                                                                                                                                                                                                                                                                                                                                                                                                                                                                                                                                                                                                                                                                                                                                                                                                                                                                                                                                                                                                                                                                                                                                                                                                                                                                                                                                                                                                                                                                                                                                                                                                                            |   |         |        |        |   |         |        |        |   |         |        |        |   |        |        |        |   |         |        |        |   |        |        |        |   |        |        |        |   |        |        |        |   |        |        |        |   |        |        |        |   |        |        |        |   |        |        |        |   |        |        |        |   |         |        |        |   |        |        |        |   |         |        |        |   |         |        |        |   |         |        |        |   |         |        |        |   |         |        |        |   |         |        |        |   |        |        |        |   |         |        |        |   |        |        |        |   |        |        |        |   |        |        |        |   |        |        |        |   |        |        |        |   |        |        |        |   |        |        |        |
| B                                                                                                                                                                                                                                                                                                                                                                                                                                                                                                                                                                                                                                                                                                                                                                                                                                                                                                                                                                                                                                                                                                                                                                                                                                                                                                                                                                                                                                                                                                                                                                                                                                                                                                                                                                                                                                                                                                                                                                                                                                                                                                          | 7.5364                                    | 1.7089  | 4.9025  |         |   |         |        |        |   |         |        |         |   |        |        |        |   |         |        |         |   |        |        |        |   |        |        |         |   |         |        |        |   |         |        |         |   |         |        |        |    |        |        |        |                                                                                                                                                                                                                                                                                                                                                                                                                                                                                                                                                                                                                                                                                                                                                                                                                      |        |        |        |         |        |        |        |        |         |        |        |         |        |        |        |        |         |        |        |         |         |        |        |        |         |        |        |         |         |         |        |        |         |         |        |         |         |         |        |        |        |        |        |        |         |        |        |   |        |        |        |   |        |        |        |   |        |        |        |   |        |        |        |   |        |        |        |   |        |        |        |   |        |        |        |                                                                                                                                                                                                                                                                                                                                                                                                                                                                                                                                                                                                                                                                                                                                                                                                                                                                                                                                                                                                                                                                                                                                                                                                                                                                                                                                                                                                                                                                                                                                                                                                                                                                                                                                                                                                                                                                                                                                                                                                                                                                                                            |   |         |        |        |   |         |        |        |   |         |        |        |   |        |        |        |   |         |        |        |   |        |        |        |   |        |        |        |   |        |        |        |   |        |        |        |   |        |        |        |   |        |        |        |   |        |        |        |   |        |        |        |   |         |        |        |   |        |        |        |   |         |        |        |   |         |        |        |   |         |        |        |   |         |        |        |   |         |        |        |   |         |        |        |   |        |        |        |   |         |        |        |   |        |        |        |   |        |        |        |   |        |        |        |   |        |        |        |   |        |        |        |   |        |        |        |   |        |        |        |

## SUPPORTING INFORMATION

|   |         |        |         |   |         |        |         |
|---|---------|--------|---------|---|---------|--------|---------|
| B | 6.4569  | 2.3295 | 7.0357  | B | 6.4640  | 2.3370 | 7.0228  |
| B | 9.9974  | 1.7488 | 4.8863  | B | 9.9995  | 1.7341 | 4.9007  |
| B | 8.7865  | 1.4939 | 7.0379  | B | 8.7679  | 1.5053 | 7.0269  |
| B | 11.8983 | 3.3186 | 4.8709  | B | 11.9255 | 3.3180 | 4.8984  |
| B | 11.1156 | 2.3493 | 7.0458  | B | 11.0772 | 2.3777 | 7.0352  |
| B | 12.3716 | 4.4761 | 7.0478  | B | 12.4280 | 4.5132 | 7.0387  |
| B | 12.3710 | 5.7352 | 9.1723  | B | 12.4890 | 5.7510 | 9.1773  |
| B | 11.1128 | 7.8730 | 9.1699  | B | 11.1490 | 7.8379 | 9.1759  |
| B | 11.9204 | 6.9126 | 11.2970 | B | 11.9786 | 6.9126 | 11.3026 |
| B | 8.7896  | 8.7220 | 9.1689  | B | 8.8039  | 8.6668 | 9.1639  |
| B | 10.0284 | 8.5020 | 11.2981 | B | 10.0453 | 8.4641 | 11.2947 |
| B | 6.4673  | 7.8752 | 9.1683  | B | 6.4732  | 7.8430 | 9.1532  |
| B | 7.5565  | 8.5019 | 11.2990 | B | 7.5691  | 8.4670 | 11.2884 |
| B | 5.2329  | 5.7337 | 9.1679  | B | 5.2320  | 5.7081 | 9.1478  |
| B | 5.6633  | 6.9127 | 11.2987 | B | 5.6722  | 6.8874 | 11.2830 |
| B | 5.6613  | 3.2985 | 9.1685  | B | 5.6466  | 3.2716 | 9.1472  |
| B | 5.2344  | 4.4784 | 11.2990 | B | 5.2356  | 4.4553 | 11.2805 |
| B | 7.5556  | 1.7108 | 9.1694  | B | 7.5420  | 1.6926 | 9.1527  |
| B | 6.4714  | 2.3384 | 11.2989 | B | 6.4599  | 2.3128 | 11.2834 |
| B | 10.0312 | 1.7136 | 9.1705  | B | 10.0126 | 1.7333 | 9.1615  |
| B | 8.7951  | 1.4954 | 11.2979 | B | 8.7875  | 1.4930 | 11.2887 |
| B | 11.9472 | 3.2907 | 9.1732  | B | 11.9113 | 3.3377 | 9.1751  |
| B | 11.1162 | 2.3417 | 11.2970 | B | 11.1073 | 2.3600 | 11.2940 |
| B | 12.3527 | 4.4804 | 11.2973 | B | 12.3951 | 4.4800 | 11.3014 |
| N | 11.9829 | 6.9445 | 1.3469  | N | 12.0241 | 6.9466 | 1.3431  |
| N | 12.4806 | 5.7505 | 3.4665  | N | 12.4901 | 5.7506 | 3.4647  |
| N | 10.0531 | 8.5615 | 1.3487  | N | 10.0713 | 8.5360 | 1.3462  |
| N | 11.1703 | 7.9300 | 3.4751  | N | 11.1952 | 7.9127 | 3.4737  |
| N | 7.5364  | 8.5626 | 1.3493  | N | 7.5514  | 8.5345 | 1.3423  |
| N | 8.7944  | 8.7953 | 3.4772  | N | 8.8118  | 8.7378 | 3.4759  |
| N | 5.6088  | 6.9447 | 1.3513  | N | 5.6164  | 6.9231 | 1.3382  |
| N | 6.4266  | 7.9289 | 3.4797  | N | 6.4410  | 7.8929 | 3.4708  |
| N | 5.1724  | 4.4661 | 1.3510  | N | 5.1711  | 4.4469 | 1.3370  |
| N | 5.1709  | 5.7446 | 3.4810  | N | 5.1712  | 5.7225 | 3.4676  |
| N | 6.4327  | 2.2885 | 1.3494  | N | 6.4235  | 2.2654 | 1.3394  |
| N | 5.6037  | 3.2618 | 3.4793  | N | 5.5966  | 3.2443 | 3.4681  |
| N | 8.7989  | 1.4292 | 1.3484  | N | 8.7970  | 1.4243 | 1.3422  |
| N | 7.5355  | 1.6396 | 3.4769  | N | 7.5320  | 1.6394 | 3.4714  |
| N | 11.1652 | 2.2881 | 1.3466  | N | 11.1596 | 2.2993 | 1.3463  |
| N | 10.0676 | 1.6351 | 3.4742  | N | 10.0480 | 1.6694 | 3.4759  |
| N | 12.4300 | 4.4664 | 1.3438  | N | 12.4485 | 4.4634 | 1.3445  |
| N | 12.0466 | 3.2370 | 3.4647  | N | 11.9891 | 3.2793 | 3.4772  |
| N | 11.8960 | 6.9026 | 5.6121  | N | 12.0630 | 6.9529 | 5.6001  |
| N | 12.4513 | 5.7484 | 7.7420  | N | 12.6222 | 5.7754 | 7.7516  |
| N | 10.0337 | 8.5590 | 5.6103  | N | 10.0570 | 8.4680 | 5.6088  |

## SUPPORTING INFORMATION

|                         |         |        |         |                        |         |        |         |
|-------------------------|---------|--------|---------|------------------------|---------|--------|---------|
| N                       | 11.1503 | 7.9199 | 7.7389  | N                      | 11.1671 | 7.8457 | 7.7379  |
| N                       | 7.5263  | 8.5724 | 5.6100  | N                      | 7.5423  | 8.5215 | 5.6018  |
| N                       | 8.7881  | 8.7914 | 7.7401  | N                      | 8.8079  | 8.7182 | 7.7335  |
| N                       | 5.6120  | 6.9433 | 5.6109  | N                      | 5.5887  | 6.9266 | 5.5973  |
| N                       | 6.4255  | 7.9267 | 7.7399  | N                      | 6.4274  | 7.9017 | 7.7305  |
| N                       | 5.1735  | 4.4675 | 5.6109  | N                      | 5.1244  | 4.4385 | 5.5943  |
| N                       | 5.1723  | 5.7444 | 7.7397  | N                      | 5.1543  | 5.7245 | 7.7300  |
| N                       | 6.4167  | 2.2836 | 5.6102  | N                      | 6.3973  | 2.2513 | 5.5965  |
| N                       | 5.6033  | 3.2649 | 7.7401  | N                      | 5.5727  | 3.2287 | 7.7308  |
| N                       | 8.7802  | 1.4557 | 5.6106  | N                      | 8.7827  | 1.4258 | 5.6021  |
| N                       | 7.5304  | 1.6478 | 7.7400  | N                      | 7.5185  | 1.6186 | 7.7311  |
| N                       | 11.0913 | 2.3702 | 5.6130  | N                      | 11.1233 | 2.3484 | 5.6092  |
| N                       | 10.0515 | 1.6554 | 7.7395  | N                      | 10.0364 | 1.6761 | 7.7340  |
| N                       | 12.3569 | 4.4810 | 5.6120  | N                      | 12.4526 | 4.4843 | 5.6037  |
| N                       | 12.0236 | 3.2477 | 7.7425  | N                      | 11.9119 | 3.3514 | 7.7354  |
| N                       | 11.9808 | 6.9443 | 9.8668  | N                      | 12.0595 | 6.9536 | 9.8747  |
| N                       | 12.4138 | 5.7458 | 11.9962 | N                      | 12.4774 | 5.7459 | 12.0022 |
| N                       | 10.0501 | 8.5633 | 9.8681  | N                      | 10.0702 | 8.5070 | 9.8632  |
| N                       | 11.1579 | 7.9244 | 11.9972 | N                      | 11.1843 | 7.9042 | 11.9964 |
| N                       | 7.5330  | 8.5646 | 9.8696  | N                      | 7.5513  | 8.5265 | 9.8609  |
| N                       | 8.7936  | 8.7855 | 11.9988 | N                      | 8.8123  | 8.7450 | 11.9925 |
| N                       | 5.6051  | 6.9459 | 9.8696  | N                      | 5.6137  | 6.9223 | 9.8591  |
| N                       | 6.4286  | 7.9236 | 11.9997 | N                      | 6.4413  | 7.9005 | 11.9904 |
| N                       | 5.1686  | 4.4666 | 9.8697  | N                      | 5.1703  | 4.4447 | 9.8582  |
| N                       | 5.1711  | 5.7447 | 12.0004 | N                      | 5.1812  | 5.7230 | 11.9879 |
| N                       | 6.4280  | 2.2872 | 9.8697  | N                      | 6.4151  | 2.2588 | 9.8598  |
| N                       | 5.6085  | 3.2661 | 11.9998 | N                      | 5.6006  | 3.2414 | 11.9886 |
| N                       | 8.7954  | 1.4302 | 9.8677  | N                      | 8.7906  | 1.4286 | 9.8620  |
| N                       | 7.5372  | 1.6490 | 11.9982 | N                      | 7.5329  | 1.6303 | 11.9919 |
| N                       | 11.1636 | 2.2891 | 9.8671  | N                      | 11.1420 | 2.3310 | 9.8620  |
| N                       | 10.0536 | 1.6525 | 11.9972 | N                      | 10.0503 | 1.6673 | 11.9928 |
| N                       | 12.4309 | 4.4660 | 9.8681  | N                      | 12.4786 | 4.4731 | 9.8723  |
| N                       | 11.9790 | 3.2698 | 11.9963 | N                      | 11.9848 | 3.2785 | 11.9960 |
| N                       | 9.3465  | 4.9557 | 4.1270  | N                      | 7.9844  | 4.8453 | 6.5487  |
| Dy                      | 9.6464  | 4.8756 | 5.9794  | Dy                     | 9.7704  | 5.3195 | 6.7278  |
| <b>8Tb<sub>  </sub></b> |         |        |         | <b>8Tb<sub>⊥</sub></b> |         |        |         |
| N                       | 11.5081 | 4.8168 | 1.3905  | N                      | 11.5975 | 4.7977 | 1.3926  |
| N                       | 11.0121 | 6.0021 | 3.5172  | N                      | 11.0502 | 5.9492 | 3.5243  |
| N                       | 10.1076 | 6.9149 | 1.3905  | N                      | 10.0914 | 6.8172 | 1.3993  |
| N                       | 8.9182  | 7.4025 | 3.5177  | N                      | 8.8886  | 7.2589 | 3.5274  |
| N                       | 7.6333  | 7.4063 | 1.3911  | N                      | 7.6215  | 7.3179 | 1.3920  |
| N                       | 6.4473  | 6.9107 | 3.5181  | N                      | 6.3952  | 6.8867 | 3.5120  |
| N                       | 5.5348  | 6.0060 | 1.3912  | N                      | 5.4645  | 6.0206 | 1.3787  |
| N                       | 5.0451  | 4.8168 | 3.5176  | N                      | 4.9214  | 4.8480 | 3.5054  |

## SUPPORTING INFORMATION

|   |         |        |         |   |         |        |         |
|---|---------|--------|---------|---|---------|--------|---------|
| N | 5.0432  | 3.5320 | 1.3902  | N | 4.9810  | 3.5579 | 1.3770  |
| N | 5.5364  | 2.3447 | 3.5168  | N | 5.4932  | 2.3852 | 3.5063  |
| N | 6.4447  | 1.4353 | 1.3897  | N | 6.4603  | 1.5245 | 1.3819  |
| N | 7.6322  | 0.9449 | 3.5169  | N | 7.6493  | 1.0840 | 3.5172  |
| N | 8.9181  | 0.9420 | 1.3904  | N | 8.9375  | 1.0479 | 1.3967  |
| N | 10.1033 | 1.4371 | 3.5176  | N | 10.1437 | 1.4922 | 3.5265  |
| N | 11.0162 | 2.3426 | 1.3909  | N | 11.1047 | 2.3311 | 1.3945  |
| N | 11.5041 | 3.5313 | 3.5174  | N | 11.6594 | 3.5057 | 3.5169  |
| N | 11.4593 | 4.8075 | 5.6534  | N | 11.6858 | 4.7982 | 5.6510  |
| N | 11.0292 | 6.0135 | 7.7867  | N | 11.0284 | 5.9179 | 7.7850  |
| N | 10.0796 | 6.8736 | 5.6536  | N | 10.0340 | 6.6972 | 5.6574  |
| N | 8.9231  | 7.4222 | 7.7874  | N | 8.8668  | 7.2116 | 7.7789  |
| N | 7.6430  | 7.3588 | 5.6542  | N | 7.5903  | 7.2860 | 5.6496  |
| N | 6.4378  | 6.9279 | 7.7879  | N | 6.3443  | 6.9807 | 7.7826  |
| N | 5.5771  | 5.9786 | 5.6541  | N | 5.3858  | 6.0747 | 5.6425  |
| N | 5.0290  | 4.8219 | 7.7873  | N | 4.8854  | 4.9019 | 7.7849  |
| N | 5.0937  | 3.5424 | 5.6535  | N | 5.0490  | 3.5830 | 5.6356  |
| N | 5.5253  | 2.3369 | 7.7866  | N | 5.4789  | 2.3218 | 7.7850  |
| N | 6.4736  | 1.4778 | 5.6532  | N | 6.4122  | 1.4702 | 5.6428  |
| N | 7.6311  | 0.9270 | 7.7869  | N | 7.6341  | 0.9708 | 7.7800  |
| N | 8.9088  | 0.9909 | 5.6538  | N | 8.9082  | 1.1822 | 5.6551  |
| N | 10.1171 | 1.4204 | 7.7873  | N | 10.0993 | 1.5653 | 7.7793  |
| N | 10.9740 | 2.3712 | 5.6538  | N | 11.1407 | 2.3395 | 5.6544  |
| N | 11.5238 | 3.5282 | 7.7869  | N | 11.6906 | 3.5031 | 7.7937  |
| N | 11.5025 | 4.8160 | 9.9155  | N | 11.6183 | 4.7974 | 9.9226  |
| N | 11.0133 | 6.0028 | 12.0443 | N | 11.0418 | 5.9582 | 12.0461 |
| N | 10.1046 | 6.9105 | 9.9156  | N | 10.0757 | 6.7892 | 9.9096  |
| N | 8.9190  | 7.4033 | 12.0448 | N | 8.9010  | 7.2877 | 12.0414 |
| N | 7.6346  | 7.4014 | 9.9164  | N | 7.6073  | 7.3091 | 9.9095  |
| N | 6.4487  | 6.9098 | 12.0453 | N | 6.4130  | 6.8942 | 12.0397 |
| N | 5.5395  | 6.0035 | 9.9163  | N | 5.4222  | 6.0594 | 9.9134  |
| N | 5.0479  | 4.8168 | 12.0445 | N | 4.9550  | 4.8451 | 12.0274 |
| N | 5.0483  | 3.5332 | 9.9149  | N | 5.0014  | 3.5671 | 9.8930  |
| N | 5.5393  | 2.3467 | 12.0433 | N | 5.5248  | 2.3955 | 12.0282 |
| N | 6.4479  | 1.4388 | 9.9146  | N | 6.4489  | 1.4935 | 9.9124  |
| N | 7.6336  | 0.9477 | 12.0437 | N | 7.6610  | 1.0601 | 12.0413 |
| N | 8.9182  | 0.9471 | 9.9156  | N | 8.9300  | 1.0580 | 9.9089  |
| N | 10.1042 | 1.4379 | 12.0448 | N | 10.1443 | 1.4766 | 12.0438 |
| N | 11.0122 | 2.3461 | 9.9160  | N | 11.1036 | 2.3386 | 9.9168  |
| N | 11.5047 | 3.5317 | 12.0447 | N | 11.6248 | 3.5100 | 12.0481 |
| N | 8.2570  | 4.1702 | 7.3490  | N | 7.0815  | 4.0356 | 7.0234  |
| B | 11.4350 | 4.8020 | 2.8122  | B | 11.5382 | 4.7782 | 2.8117  |
| B | 10.9548 | 5.9640 | 0.6864  | B | 10.9818 | 5.9178 | 0.6934  |
| B | 10.0657 | 6.8526 | 2.8122  | B | 10.0471 | 6.7533 | 2.8233  |
| B | 8.9049  | 7.3343 | 0.6867  | B | 8.8821  | 7.2275 | 0.6909  |

## SUPPORTING INFORMATION

|    |         |        |         |    |         |        |         |
|----|---------|--------|---------|----|---------|--------|---------|
| B  | 7.6475  | 7.3334 | 2.8128  | B  | 7.6087  | 7.2412 | 2.8171  |
| B  | 6.4867  | 6.8523 | 0.6874  | B  | 6.4462  | 6.8212 | 0.6826  |
| B  | 5.5962  | 5.9643 | 2.8128  | B  | 5.5038  | 5.9689 | 2.8058  |
| B  | 5.1163  | 4.8034 | 0.6865  | B  | 5.0338  | 4.8231 | 0.6687  |
| B  | 5.1144  | 3.5458 | 2.8120  | B  | 5.0414  | 3.5785 | 2.8090  |
| B  | 5.5976  | 2.3859 | 0.6853  | B  | 5.5749  | 2.4412 | 0.6709  |
| B  | 6.4846  | 1.4955 | 2.8115  | B  | 6.4717  | 1.5903 | 2.8084  |
| B  | 7.6471  | 1.0162 | 0.6856  | B  | 7.6625  | 1.1273 | 0.6869  |
| B  | 8.9031  | 1.0143 | 2.8121  | B  | 8.9115  | 1.1232 | 2.8213  |
| B  | 10.0652 | 1.4958 | 0.6868  | B  | 10.1030 | 1.5346 | 0.6916  |
| B  | 10.9539 | 2.3837 | 2.8126  | B  | 11.0489 | 2.3760 | 2.8148  |
| B  | 11.4355 | 3.5452 | 0.6868  | B  | 11.5419 | 3.5243 | 0.6920  |
| B  | 11.3931 | 4.7941 | 7.0956  | B  | 11.6037 | 4.7770 | 7.0852  |
| B  | 10.9492 | 5.9607 | 4.9429  | B  | 11.0128 | 5.8938 | 4.9416  |
| B  | 10.0420 | 6.8167 | 7.0957  | B  | 10.0288 | 6.7247 | 7.0917  |
| B  | 8.9035  | 7.3290 | 4.9434  | B  | 8.8378  | 7.1758 | 4.9469  |
| B  | 7.6571  | 7.2907 | 7.0966  | B  | 7.5709  | 7.2334 | 7.0839  |
| B  | 6.4892  | 6.8492 | 4.9439  | B  | 6.3873  | 6.8263 | 4.9440  |
| B  | 5.6361  | 5.9401 | 7.0966  | B  | 5.4645  | 6.0192 | 7.0868  |
| B  | 5.1201  | 4.8032 | 4.9433  | B  | 5.0101  | 4.8286 | 4.9479  |
| B  | 5.1637  | 3.5568 | 7.0960  | B  | 5.5474  | 3.6995 | 7.0720  |
| B  | 5.6006  | 2.3878 | 4.9426  | B  | 5.5478  | 2.4471 | 4.9479  |
| B  | 6.5137  | 1.5359 | 7.0958  | B  | 6.4515  | 1.5367 | 7.0883  |
| B  | 7.6480  | 1.0195 | 4.9427  | B  | 7.6156  | 1.1552 | 4.9425  |
| B  | 8.8968  | 1.0582 | 7.0963  | B  | 8.8796  | 1.1241 | 7.0925  |
| B  | 10.0621 | 1.5002 | 4.9433  | B  | 10.1078 | 1.5672 | 4.9440  |
| B  | 10.9188 | 2.4085 | 7.0961  | B  | 11.0853 | 2.3741 | 7.0888  |
| B  | 11.4294 | 3.5468 | 4.9430  | B  | 11.6309 | 3.5177 | 4.9363  |
| B  | 11.4309 | 4.8015 | 11.3387 | B  | 11.5223 | 4.7798 | 11.3521 |
| B  | 10.9476 | 5.9595 | 9.2119  | B  | 10.9760 | 5.8949 | 9.2266  |
| B  | 10.0637 | 6.8492 | 11.3388 | B  | 10.0474 | 6.7559 | 11.3431 |
| B  | 8.9032  | 7.3260 | 9.2124  | B  | 8.8561  | 7.1828 | 9.2153  |
| B  | 7.6492  | 7.3287 | 11.3394 | B  | 7.6211  | 7.2484 | 11.3370 |
| B  | 6.4914  | 6.8460 | 9.2129  | B  | 6.4005  | 6.8536 | 9.2061  |
| B  | 5.6018  | 5.9616 | 11.3392 | B  | 5.5124  | 5.9867 | 11.3274 |
| B  | 5.1246  | 4.8023 | 9.2120  | B  | 4.9859  | 4.8522 | 9.1802  |
| B  | 5.1207  | 3.5475 | 11.3379 | B  | 5.0646  | 3.5809 | 11.3061 |
| B  | 5.6054  | 2.3907 | 9.2111  | B  | 5.5480  | 2.4103 | 9.1821  |
| B  | 6.4887  | 1.5008 | 11.3375 | B  | 6.4928  | 1.5787 | 11.3293 |
| B  | 7.6495  | 1.0233 | 9.2116  | B  | 7.6403  | 1.0962 | 9.2098  |
| B  | 8.9033  | 1.0203 | 11.3385 | B  | 8.9190  | 1.1118 | 11.3399 |
| B  | 10.0618 | 1.5023 | 9.2124  | B  | 10.0800 | 1.5744 | 9.2233  |
| B  | 10.9507 | 2.3870 | 11.3390 | B  | 11.0342 | 2.3798 | 11.3482 |
| B  | 11.4273 | 3.5472 | 9.2120  | B  | 11.5716 | 3.5237 | 9.2296  |
| Tb | 8.2631  | 4.1677 | 5.4692  | Tb | 8.9106  | 4.0764 | 6.4901  |

## SUPPORTING INFORMATION

| $9\text{Tb}_{\parallel}$ |         |        |         | $9\text{Tb}_{\perp}$ |         |        |         |
|--------------------------|---------|--------|---------|----------------------|---------|--------|---------|
| B                        | 12.3535 | 5.7330 | 0.6475  | B                    | 12.3923 | 5.7309 | 0.6469  |
| B                        | 11.1145 | 7.8700 | 0.6482  | B                    | 11.1365 | 7.8628 | 0.6449  |
| B                        | 11.9305 | 6.9096 | 2.7744  | B                    | 11.9696 | 6.9169 | 2.7670  |
| B                        | 8.7938  | 8.7158 | 0.6479  | B                    | 8.8043  | 8.6964 | 0.6427  |
| B                        | 10.0290 | 8.4959 | 2.7746  | B                    | 10.0444 | 8.4809 | 2.7736  |
| B                        | 6.4734  | 7.8715 | 0.6479  | B                    | 6.4798  | 7.8530 | 0.6386  |
| B                        | 7.5599  | 8.4975 | 2.7750  | B                    | 7.5644  | 8.4723 | 2.7720  |
| B                        | 5.2390  | 5.7325 | 0.6483  | B                    | 5.2473  | 5.7130 | 0.6342  |
| B                        | 5.6716  | 6.9092 | 2.7763  | B                    | 5.6717  | 6.8844 | 2.7689  |
| B                        | 5.6689  | 3.3008 | 0.6479  | B                    | 5.6659  | 3.2815 | 0.6337  |
| B                        | 5.2431  | 4.4785 | 2.7763  | B                    | 5.2376  | 4.4581 | 2.7669  |
| B                        | 7.5622  | 1.7150 | 0.6481  | B                    | 7.5561  | 1.6974 | 0.6378  |
| B                        | 6.4763  | 2.3414 | 2.7751  | B                    | 6.4642  | 2.3245 | 2.7673  |
| B                        | 10.0323 | 1.7161 | 0.6484  | B                    | 10.0282 | 1.7134 | 0.6420  |
| B                        | 8.7986  | 1.4985 | 2.7749  | B                    | 8.7864  | 1.4927 | 2.7716  |
| B                        | 11.9268 | 3.3006 | 0.6476  | B                    | 11.9316 | 3.2977 | 0.6449  |
| B                        | 11.1297 | 2.3369 | 2.7740  | B                    | 11.1128 | 2.3447 | 2.7757  |
| B                        | 12.3802 | 4.4738 | 2.7711  | B                    | 12.3864 | 4.4747 | 2.7693  |
| B                        | 12.3213 | 5.7327 | 4.8759  | B                    | 12.4427 | 5.7448 | 4.8845  |
| B                        | 11.0757 | 7.8593 | 4.8899  | B                    | 11.1550 | 7.8607 | 4.8959  |
| B                        | 11.9157 | 6.9060 | 7.0437  | B                    | 12.0191 | 6.9084 | 7.0383  |
| B                        | 8.7789  | 8.7219 | 4.8968  | B                    | 8.7913  | 8.6696 | 4.8999  |
| B                        | 10.0235 | 8.5097 | 7.0362  | B                    | 10.0402 | 8.4589 | 7.0369  |
| B                        | 6.4682  | 7.8733 | 4.9000  | B                    | 6.4667  | 7.8339 | 4.9005  |
| B                        | 7.5497  | 8.5127 | 7.0343  | B                    | 7.5574  | 8.4565 | 7.0274  |
| B                        | 5.2409  | 5.7325 | 4.9005  | B                    | 5.2315  | 5.7000 | 4.9016  |
| B                        | 5.6615  | 6.9144 | 7.0338  | B                    | 5.6792  | 6.8707 | 7.0232  |
| B                        | 5.6611  | 3.3016 | 4.8992  | B                    | 5.6425  | 3.2744 | 4.9013  |
| B                        | 5.2304  | 4.4776 | 7.0335  | B                    | 5.2720  | 4.4603 | 7.0183  |
| B                        | 7.5449  | 1.7209 | 4.8957  | B                    | 7.5320  | 1.6988 | 4.9014  |
| B                        | 6.4603  | 2.3312 | 7.0343  | B                    | 6.4694  | 2.3405 | 7.0202  |
| B                        | 9.9986  | 1.7451 | 4.8869  | B                    | 9.9981  | 1.7286 | 4.9012  |
| B                        | 8.7889  | 1.4936 | 7.0372  | B                    | 8.7698  | 1.4984 | 7.0262  |
| B                        | 11.8979 | 3.3154 | 4.8735  | B                    | 11.9304 | 3.3129 | 4.8981  |
| B                        | 11.1183 | 2.3469 | 7.0455  | B                    | 11.0819 | 2.3710 | 7.0358  |
| B                        | 12.3688 | 4.4760 | 7.0478  | B                    | 12.4293 | 4.5087 | 7.0397  |
| B                        | 12.3757 | 5.7354 | 9.1732  | B                    | 12.4753 | 5.7495 | 9.1782  |
| B                        | 11.1162 | 7.8738 | 9.1707  | B                    | 11.1482 | 7.8458 | 9.1772  |
| B                        | 11.9220 | 6.9116 | 11.2980 | B                    | 11.9699 | 6.9110 | 11.3023 |
| B                        | 8.7919  | 8.7220 | 9.1689  | B                    | 8.8040  | 8.6764 | 9.1642  |
| B                        | 10.0287 | 8.4997 | 11.2984 | B                    | 10.0432 | 8.4717 | 11.2956 |
| B                        | 6.4688  | 7.8763 | 9.1673  | B                    | 6.4746  | 7.8484 | 9.1535  |
| B                        | 7.5577  | 8.5013 | 11.2978 | B                    | 7.5681  | 8.4769 | 11.2896 |

## SUPPORTING INFORMATION

|   |         |        |         |   |         |        |         |
|---|---------|--------|---------|---|---------|--------|---------|
| B | 5.2343  | 5.7335 | 9.1665  | B | 5.2381  | 5.7105 | 9.1476  |
| B | 5.6656  | 6.9120 | 11.2973 | B | 5.6738  | 6.8918 | 11.2836 |
| B | 5.6626  | 3.2981 | 9.1677  | B | 5.6508  | 3.2730 | 9.1469  |
| B | 5.2373  | 4.4784 | 11.2973 | B | 5.2427  | 4.4592 | 11.2800 |
| B | 7.5578  | 1.7108 | 9.1693  | B | 7.5451  | 1.6921 | 9.1522  |
| B | 6.4731  | 2.3385 | 11.2982 | B | 6.4660  | 2.3158 | 11.2822 |
| B | 10.0338 | 1.7105 | 9.1714  | B | 10.0152 | 1.7288 | 9.1620  |
| B | 8.7963  | 1.4964 | 11.2982 | B | 8.7924  | 1.4873 | 11.2885 |
| B | 11.9501 | 3.2892 | 9.1737  | B | 11.9137 | 3.3330 | 9.1757  |
| B | 11.1183 | 2.3412 | 11.2981 | B | 11.1138 | 2.3502 | 11.2942 |
| B | 12.3564 | 4.4793 | 11.2987 | B | 12.3921 | 4.4761 | 11.3021 |
| N | 11.9821 | 6.9450 | 1.3478  | N | 12.0162 | 6.9447 | 1.3453  |
| N | 12.4727 | 5.7502 | 3.4672  | N | 12.4806 | 5.7488 | 3.4660  |
| N | 10.0523 | 8.5612 | 1.3483  | N | 10.0680 | 8.5409 | 1.3474  |
| N | 11.1689 | 7.9312 | 3.4748  | N | 11.1919 | 7.9163 | 3.4747  |
| N | 7.5362  | 8.5624 | 1.3483  | N | 7.5498  | 8.5431 | 1.3440  |
| N | 8.7940  | 8.7963 | 3.4758  | N | 8.8102  | 8.7491 | 3.4768  |
| N | 5.6097  | 6.9445 | 1.3491  | N | 5.6208  | 6.9258 | 1.3393  |
| N | 6.4256  | 7.9300 | 3.4773  | N | 6.4388  | 7.8993 | 3.4711  |
| N | 5.1734  | 4.4667 | 1.3490  | N | 5.1776  | 4.4495 | 1.3364  |
| N | 5.1689  | 5.7447 | 3.4778  | N | 5.1758  | 5.7234 | 3.4679  |
| N | 6.4322  | 2.2885 | 1.3482  | N | 6.4293  | 2.2696 | 1.3379  |
| N | 5.6027  | 3.2615 | 3.4770  | N | 5.5971  | 3.2438 | 3.4669  |
| N | 8.7975  | 1.4295 | 1.3484  | N | 8.7981  | 1.4249 | 1.3431  |
| N | 7.5348  | 1.6398 | 3.4758  | N | 7.5327  | 1.6370 | 3.4704  |
| N | 11.1643 | 2.2877 | 1.3476  | N | 11.1600 | 2.2962 | 1.3485  |
| N | 10.0649 | 1.6353 | 3.4738  | N | 10.0496 | 1.6629 | 3.4768  |
| N | 12.4298 | 4.4661 | 1.3451  | N | 12.4418 | 4.4628 | 1.3470  |
| N | 12.0392 | 3.2392 | 3.4660  | N | 11.9906 | 3.2739 | 3.4774  |
| N | 11.8988 | 6.9052 | 5.6125  | N | 12.0512 | 6.9487 | 5.6013  |
| N | 12.4552 | 5.7487 | 7.7429  | N | 12.6089 | 5.7741 | 7.7524  |
| N | 10.0329 | 8.5567 | 5.6098  | N | 10.0588 | 8.4852 | 5.6085  |
| N | 11.1537 | 7.9208 | 7.7401  | N | 11.1720 | 7.8605 | 7.7391  |
| N | 7.5269  | 8.5691 | 5.6085  | N | 7.5426  | 8.5280 | 5.6021  |
| N | 8.7902  | 8.7890 | 7.7401  | N | 8.8090  | 8.7274 | 7.7334  |
| N | 5.6117  | 6.9428 | 5.6084  | N | 5.5931  | 6.9254 | 5.5976  |
| N | 6.4275  | 7.9260 | 7.7393  | N | 6.4298  | 7.9047 | 7.7299  |
| N | 5.1733  | 4.4678 | 5.6084  | N | 5.1238  | 4.4354 | 5.5928  |
| N | 5.1739  | 5.7438 | 7.7384  | N | 5.1599  | 5.7251 | 7.7294  |
| N | 6.4186  | 2.2866 | 5.6088  | N | 6.3895  | 2.2384 | 5.5946  |
| N | 5.6057  | 3.2652 | 7.7391  | N | 5.5770  | 3.2308 | 7.7305  |
| N | 8.7806  | 1.4553 | 5.6102  | N | 8.7803  | 1.4159 | 5.6011  |
| N | 7.5338  | 1.6500 | 7.7399  | N | 7.5216  | 1.6188 | 7.7303  |
| N | 11.0956 | 2.3623 | 5.6129  | N | 11.1227 | 2.3454 | 5.6090  |
| N | 10.0543 | 1.6525 | 7.7403  | N | 10.0384 | 1.6713 | 7.7339  |

## SUPPORTING INFORMATION

|    |         |        |         |    |         |        |         |
|----|---------|--------|---------|----|---------|--------|---------|
| N  | 12.3510 | 4.4806 | 5.6121  | N  | 12.4601 | 4.4800 | 5.6039  |
| N  | 12.0258 | 3.2462 | 7.7435  | N  | 11.9204 | 3.3417 | 7.7364  |
| N  | 11.9830 | 6.9445 | 9.8675  | N  | 12.0493 | 6.9516 | 9.8748  |
| N  | 12.4181 | 5.7456 | 11.9979 | N  | 12.4699 | 5.7436 | 12.0024 |
| N  | 10.0521 | 8.5626 | 9.8683  | N  | 10.0699 | 8.5174 | 9.8641  |
| N  | 11.1580 | 7.9228 | 11.9983 | N  | 11.1791 | 7.9051 | 11.9976 |
| N  | 7.5349  | 8.5649 | 9.8687  | N  | 7.5508  | 8.5349 | 9.8614  |
| N  | 8.7940  | 8.7846 | 11.9987 | N  | 8.8106  | 8.7570 | 11.9937 |
| N  | 5.6077  | 6.9456 | 9.8684  | N  | 5.6169  | 6.9257 | 9.8592  |
| N  | 6.4297  | 7.9238 | 11.9987 | N  | 6.4408  | 7.9069 | 11.9908 |
| N  | 5.1709  | 4.4668 | 9.8683  | N  | 5.1768  | 4.4474 | 9.8579  |
| N  | 5.1723  | 5.7443 | 11.9989 | N  | 5.1859  | 5.7265 | 11.9874 |
| N  | 6.4295  | 2.2868 | 9.8689  | N  | 6.4199  | 2.2610 | 9.8591  |
| N  | 5.6100  | 3.2666 | 11.9990 | N  | 5.6095  | 3.2465 | 11.9877 |
| N  | 8.7970  | 1.4296 | 9.8681  | N  | 8.7929  | 1.4265 | 9.8617  |
| N  | 7.5385  | 1.6501 | 11.9990 | N  | 7.5373  | 1.6297 | 11.9907 |
| N  | 11.1660 | 2.2879 | 9.8678  | N  | 11.1465 | 2.3240 | 9.8624  |
| N  | 10.0545 | 1.6525 | 11.9984 | N  | 10.0565 | 1.6563 | 11.9921 |
| N  | 12.4326 | 4.4656 | 9.8691  | N  | 12.4712 | 4.4725 | 9.8729  |
| N  | 11.9826 | 3.2679 | 11.9979 | N  | 11.9900 | 3.2705 | 11.9965 |
| N  | 9.2996  | 4.9696 | 4.1496  | N  | 7.9683  | 4.7916 | 6.5215  |
| Tb | 9.6196  | 4.8925 | 5.9999  | Tb | 9.7491  | 5.2830 | 6.7228  |

Cluster Models

---



## SUPPORTING INFORMATION

| <b>8Dy<sub>  </sub></b> |         |         | <b>8Dy<sub>⊥</sub></b> |    |         |         |         |
|-------------------------|---------|---------|------------------------|----|---------|---------|---------|
| Dy                      | 0.0000  | 0.0000  | 0.0000                 | Dy | 0.0000  | 0.0000  | 0.0000  |
| N                       | 0.0000  | 0.0000  | 1.8764                 | N  | 0.0000  | 0.0000  | 1.9012  |
| N                       | 0.0534  | 3.3327  | -1.9257                | N  | -2.7743 | -0.7450 | -2.9146 |
| N                       | -2.2868 | 2.3888  | -1.9400                | N  | -4.2306 | -0.4685 | -0.8679 |
| N                       | -3.2745 | 0.0663  | -1.9567                | N  | -4.3759 | -1.2516 | 1.5210  |
| N                       | -2.3309 | -2.2753 | -1.9660                | N  | -2.9713 | -2.7626 | 2.9573  |
| N                       | -0.0071 | -3.2627 | -1.9626                | N  | -0.8586 | -4.0627 | 2.4745  |
| N                       | 2.3338  | -2.3170 | -1.9486                | N  | 0.5970  | -4.3242 | 0.4367  |
| N                       | 3.3202  | 0.0060  | -1.9321                | N  | 0.7039  | -3.5186 | -1.9567 |
| N                       | 2.3757  | 2.3455  | -1.9226                | N  | -0.6739 | -2.0270 | -3.4515 |
| N                       | 1.2857  | 3.0133  | 0.2134                 | N  | -0.5513 | 0.4028  | -2.8943 |
| N                       | 0.0377  | 3.3255  | 2.3431                 | N  | -0.4148 | 2.5756  | -1.6664 |
| N                       | -1.1993 | 3.0358  | 0.2043                 | N  | -2.3917 | 1.1316  | -1.3410 |
| N                       | -2.3140 | 2.3778  | 2.3292                 | N  | -1.8944 | 2.8669  | 0.3567  |
| N                       | -2.9710 | 1.2945  | 0.1881                 | N  | -3.3343 | 0.9368  | 0.9779  |
| N                       | -3.3075 | 0.0440  | 2.3128                 | N  | -2.1185 | 2.1475  | 2.7761  |
| N                       | -2.9926 | -1.1884 | 0.1745                 | N  | -2.7173 | -0.2720 | 3.0986  |
| N                       | -2.3588 | -2.3091 | 2.3037                 | N  | -0.6767 | 0.6240  | 4.2091  |
| N                       | -1.2530 | -2.9588 | 0.1716                 | N  | -0.7468 | -1.7930 | 3.4747  |
| N                       | -0.0231 | -3.3009 | 2.3071                 | N  | 1.5355  | -0.7328 | 3.6955  |
| N                       | 1.2293  | -2.9822 | 0.1806                 | N  | 1.2331  | -2.7128 | 2.2237  |
| N                       | 2.3295  | -2.3511 | 2.3209                 | N  | 3.0326  | -1.0486 | 1.6676  |
| N                       | 3.0031  | -1.2442 | 0.1965                 | N  | 1.9049  | -2.3000 | -0.1617 |
| N                       | 3.3208  | -0.0168 | 2.3369                 | N  | 2.9704  | -0.1447 | -0.7016 |
| N                       | 3.0272  | 1.2403  | 0.2101                 | N  | 1.3573  | -1.1344 | -2.3207 |
| N                       | 2.3711  | 2.3338  | 2.3462                 | N  | 1.6808  | 1.3399  | -2.2574 |
| N                       | 1.2862  | 3.0295  | 4.4730                 | N  | 1.7768  | 3.7423  | -1.6020 |
| N                       | -1.2314 | 3.0530  | 4.4638                 | N  | -0.1384 | 4.5457  | -0.1748 |
| N                       | -3.0281 | 1.2888  | 4.4474                 | N  | -1.0121 | 4.3024  | 2.1770  |
| N                       | -3.0518 | -1.2292 | 4.4336                 | N  | -0.3557 | 3.0830  | 4.2788  |
| N                       | -1.2876 | -3.0258 | 4.4305                 | N  | 1.5919  | 1.5373  | 4.7203  |
| N                       | 1.2303  | -3.0482 | 4.4398                 | N  | 3.5676  | 0.6615  | 3.4050  |
| N                       | 3.0275  | -1.2848 | 4.4560                 | N  | 4.3608  | 0.9643  | 1.0326  |
| N                       | 3.0509  | 1.2333  | 4.4697                 | N  | 3.6870  | 2.2049  | -1.0589 |
| B                       | 1.2863  | 3.0054  | -2.6283                | B  | -2.1225 | -1.8732 | -3.5616 |
| B                       | -1.1799 | 3.0285  | -2.6375                | B  | -3.9965 | -1.0556 | -2.1682 |
| B                       | -2.9399 | 1.3005  | -2.6540                | B  | -4.8363 | -1.3207 | 0.1573  |
| B                       | -2.9634 | -1.1663 | -2.6677                | B  | -4.1715 | -2.5353 | 2.1891  |
| B                       | -1.2351 | -2.9273 | -2.6708                | B  | -2.2984 | -4.0187 | 2.6781  |
| B                       | 1.2321  | -2.9491 | -2.6615                | B  | -0.4163 | -4.8531 | 1.3542  |
| B                       | 2.9919  | -1.2202 | -2.6455                | B  | 0.4044  | -4.5643 | -0.9714 |
| B                       | 3.0143  | 1.2459  | -2.6319                | B  | -0.2479 | -3.3666 | -3.0416 |
| B                       | 1.2534  | 2.9424  | 1.6554                 | B  | 0.2364  | 1.4989  | -2.4006 |
| B                       | 0.0478  | 3.2460  | -0.4999                | B  | -1.9560 | 0.3267  | -2.4710 |

## SUPPORTING INFORMATION

|                         |         |         |         |                        |         |         |         |
|-------------------------|---------|---------|---------|------------------------|---------|---------|---------|
| B                       | -1.1795 | 2.9646  | 1.6465  | B                      | -1.6407 | 2.2838  | -0.9306 |
| B                       | -2.2360 | 2.3254  | -0.5138 | B                      | -3.3967 | 0.5907  | -0.4136 |
| B                       | -2.9145 | 1.2599  | 1.6312  | B                      | -2.5097 | 2.0321  | 1.4014  |
| B                       | -3.2004 | 0.0589  | -0.5303 | B                      | -3.5443 | -0.1592 | 1.9337  |
| B                       | -2.9361 | -1.1713 | 1.6183  | B                      | -1.8676 | 0.8494  | 3.4345  |
| B                       | -2.2792 | -2.2259 | -0.5394 | B                      | -2.1473 | -1.6210 | 3.2839  |
| B                       | -1.2324 | -2.9052 | 1.6156  | B                      | 0.0329  | -0.4844 | 3.3939  |
| B                       | -0.0111 | -3.1893 | -0.5361 | B                      | -0.1055 | -2.8823 | 2.8308  |
| B                       | 1.1985  | -2.9278 | 1.6242  | B                      | 1.9766  | -1.5274 | 2.5917  |
| B                       | 2.2733  | -2.2669 | -0.5224 | B                      | 1.3155  | -3.1711 | 0.8748  |
| B                       | 2.9350  | -1.2258 | 1.6392  | B                      | 2.7407  | -1.2137 | 0.2769  |
| B                       | 3.2362  | 0.0000  | -0.5061 | B                      | 1.4149  | -2.3697 | -1.5207 |
| B                       | 2.9584  | 1.2066  | 1.6520  | B                      | 2.1082  | 0.0000  | -1.8587 |
| B                       | 2.3140  | 2.2829  | -0.4968 | B                      | 0.0911  | -0.9107 | -3.0214 |
| B                       | 0.0317  | 3.2194  | 3.7671  | B                      | 0.3830  | 3.6871  | -1.2078 |
| B                       | -2.2497 | 2.2994  | 3.7536  | B                      | -1.0741 | 3.9667  | 0.7825  |
| B                       | -3.2126 | 0.0353  | 3.7376  | B                      | -1.2265 | 3.2071  | 3.1325  |
| B                       | -2.2921 | -2.2465 | 3.7288  | B                      | 0.1489  | 1.7136  | 4.5078  |
| B                       | -0.0276 | -3.2083 | 3.7321  | B                      | 2.2467  | 0.4274  | 4.0283  |
| B                       | 2.2538  | -2.2876 | 3.7454  | B                      | 3.7187  | 0.1459  | 2.0690  |
| B                       | 3.2164  | -0.0237 | 3.7612  | B                      | 3.7553  | 0.9881  | -0.2688 |
| B                       | 2.2955  | 2.2572  | 3.7702  | B                      | 2.4283  | 2.4525  | -1.7289 |
| H                       | -3.0577 | 1.3596  | -3.8593 | H                      | -0.1498 | -5.5744 | -1.3493 |
| H                       | -3.0837 | -1.2097 | -3.8734 | H                      | -0.9881 | -5.8830 | 1.0590  |
| H                       | -1.2830 | -3.0432 | -3.8767 | H                      | -0.8193 | -4.3363 | -3.4890 |
| H                       | -1.2258 | 3.1610  | -3.8419 | H                      | -2.7887 | -2.7687 | -4.0320 |
| H                       | 1.3435  | 3.1354  | -3.8325 | H                      | -4.7337 | -1.9224 | -2.5849 |
| H                       | 3.1446  | 1.3031  | -3.8360 | H                      | -5.6098 | -2.1894 | -0.1880 |
| H                       | 3.1191  | -1.2661 | -3.8504 | H                      | -4.9284 | -3.4534 | 1.9442  |
| H                       | 1.2869  | -3.0674 | -3.8670 | H                      | -2.9602 | -5.0122 | 2.4478  |
| H                       | -1.2336 | -2.8946 | 5.4427  | H                      | 4.0424  | 1.5395  | 3.6273  |
| H                       | 1.1703  | -2.9144 | 5.4513  | H                      | 4.8225  | 1.8198  | 1.3487  |
| H                       | 2.8875  | -1.2326 | 5.4672  | H                      | 4.1737  | 3.0196  | -0.6780 |
| H                       | -2.9161 | -1.1782 | 5.4454  | H                      | 2.3335  | 4.4929  | -1.1866 |
| H                       | -2.8956 | 1.2255  | 5.4588  | H                      | 0.4737  | 5.2875  | 0.1716  |
| H                       | -1.1792 | 2.9089  | 5.4743  | H                      | -0.3476 | 5.0269  | 2.4569  |
| H                       | 1.2251  | 2.8884  | 5.4835  | H                      | 0.2932  | 3.8538  | 4.4544  |
| H                       | 2.9087  | 1.1717  | 5.4799  | H                      | 2.1406  | 2.3929  | 4.8300  |
| <b>9Dy<sub>  </sub></b> |         |         |         | <b>9Dy<sub>⊥</sub></b> |         |         |         |
| Dy                      | 0.0000  | 0.0000  | 0.0000  | Dy                     | 0.0000  | 0.0000  | 0.0000  |
| N                       | 0.0000  | 0.0000  | 1.8782  | N                      | 0.0000  | 0.0000  | 1.8566  |
| B                       | 3.1957  | -1.0536 | 2.8827  | B                      | 0.6858  | 4.2479  | -2.1491 |
| B                       | 1.8363  | -3.0921 | 3.2532  | B                      | 2.6911  | 4.2375  | -0.6896 |
| B                       | -0.5070 | -3.7654 | 3.6463  | B                      | 3.3317  | 4.0521  | 1.6998  |

## SUPPORTING INFORMATION

|   |         |         |         |   |         |         |         |
|---|---------|---------|---------|---|---------|---------|---------|
| B | -2.7471 | -2.7562 | 3.8778  | B | 2.3069  | 3.7669  | 3.9274  |
| B | -3.8388 | -0.5422 | 3.8429  | B | 0.0869  | 3.5120  | 4.9669  |
| B | -3.2683 | 1.8416  | 3.5568  | B | -2.2885 | 3.4072  | 4.3305  |
| B | -1.3004 | 3.2806  | 3.1508  | B | -3.6948 | 3.5046  | 2.3068  |
| B | 1.1492  | 3.1113  | 2.8159  | B | -3.4836 | 3.7549  | -0.1503 |
| B | 2.9397  | 1.4035  | 2.7104  | B | -1.7725 | 4.0529  | -1.9247 |
| B | 2.9361  | 0.0000  | 0.7000  | B | -0.4182 | 2.0725  | -2.5088 |
| B | 2.3505  | -2.3791 | 0.9738  | B | 1.9505  | 2.1576  | -1.8064 |
| B | 2.5727  | -1.4215 | -1.3247 | B | 0.9554  | 0.0086  | -2.6035 |
| B | 0.4138  | -3.8312 | 1.3686  | B | 3.3435  | 2.0482  | 0.2666  |
| B | 1.2298  | -3.4734 | -0.9473 | B | 2.9616  | 0.0000  | -1.0851 |
| B | -2.0184 | -3.6440 | 1.6969  | B | 3.1570  | 1.7962  | 2.7135  |
| B | -1.1161 | -4.1504 | -0.5511 | B | 3.6132  | -0.1765 | 1.3025  |
| B | -3.7853 | -1.9253 | 1.7999  | B | 1.4346  | 1.5063  | 4.4493  |
| B | -3.3589 | -3.1287 | -0.3181 | B | 2.5856  | -0.4590 | 3.5132  |
| B | -4.0726 | 0.5191  | 1.6316  | B | -1.0049 | 1.3156  | 4.6636  |
| B | -4.4549 | -0.9091 | -0.3536 | B | 0.3741  | -0.7074 | 4.5194  |
| B | -2.7313 | 2.5477  | 1.2683  | B | -3.0148 | 1.3132  | 3.2475  |
| B | -3.8934 | 1.4839  | -0.6412 | B | -1.9824 | -0.8152 | 3.9141  |
| B | -0.3928 | 3.1860  | 0.8886  | B | -3.6370 | 1.5027  | 0.8717  |
| B | -1.9180 | 2.9176  | -1.0509 | B | -3.3873 | -0.7222 | 1.9098  |
| B | 1.8556  | 2.1989  | 0.6672  | B | -2.6182 | 1.7951  | -1.3855 |
| B | 0.5321  | 2.7298  | -1.3941 | B | -3.1531 | -0.4766 | -0.5354 |
| B | 2.3227  | 1.0321  | -1.5059 | B | -1.4521 | -0.1826 | -2.3806 |
| B | 2.3763  | -0.3566 | -3.5474 | B | -0.1292 | -2.1880 | -2.9618 |
| B | 1.7844  | -2.7476 | -3.2529 | B | 2.2310  | -2.0960 | -2.2056 |
| B | -0.1812 | -4.1925 | -2.8447 | B | 3.6435  | -2.1846 | -0.1602 |
| B | -2.6235 | -4.0115 | -2.5094 | B | 3.4616  | -2.4250 | 2.2933  |
| B | -4.3980 | -2.2941 | -2.4033 | B | 1.7322  | -2.7088 | 4.0332  |
| B | -4.6774 | 0.1566  | -2.5763 | B | -0.7218 | -2.9005 | 4.2568  |
| B | -3.3267 | 2.1930  | -2.9473 | B | -2.7386 | -2.9081 | 2.8361  |
| B | -0.9766 | 2.8629  | -3.3437 | B | -3.3473 | -2.7271 | 0.4482  |
| B | 1.2855  | 1.8714  | -3.5849 | B | -2.3005 | -2.4506 | -1.7895 |
| N | 3.2916  | 0.1461  | 2.0632  | N | -0.5240 | 3.4843  | -2.4115 |
| N | 2.6606  | -2.2999 | 2.3569  | N | 1.8974  | 3.5762  | -1.7189 |
| N | 0.6491  | -3.7750 | 2.7711  | N | 3.3173  | 3.4703  | 0.3630  |
| N | -1.8424 | -3.5880 | 3.1096  | N | 3.1260  | 3.2194  | 2.8600  |
| N | -3.6493 | -1.8354 | 3.2157  | N | 1.3700  | 2.9281  | 4.6362  |
| N | -3.9374 | 0.6625  | 3.0422  | N | -1.1268 | 2.7323  | 4.8598  |
| N | -2.5605 | 2.7424  | 2.6670  | N | -3.1792 | 2.7275  | 3.4075  |
| N | -0.1583 | 3.4347  | 2.2653  | N | -3.8103 | 2.9152  | 0.9790  |
| N | 2.1723  | 2.4378  | 2.0268  | N | -2.7702 | 3.2075  | -1.2996 |
| N | 2.7578  | -1.3006 | 0.0895  | N | 0.8926  | 1.4421  | -2.5138 |
| N | 2.6584  | -0.2253 | -2.1490 | N | -0.2390 | -0.7601 | -2.9586 |
| N | 1.4570  | -3.3942 | 0.4594  | N | 2.8779  | 1.4214  | -0.9718 |

## SUPPORTING INFORMATION

|   |         |         |         |   |         |         |         |
|---|---------|---------|---------|---|---------|---------|---------|
| N | 2.0357  | -2.6600 | -1.8456 | N | 2.1346  | -0.6661 | -2.0863 |
| N | -0.9188 | -4.0881 | 0.8605  | N | 3.5890  | 1.2441  | 1.4343  |
| N | 0.0390  | -4.1373 | -1.4323 | N | 3.5932  | -0.7593 | -0.0392 |
| N | -3.1945 | -3.0468 | 1.0958  | N | 2.5663  | 0.9552  | 3.7215  |
| N | -2.4468 | -3.9503 | -1.0919 | N | 3.4319  | -1.0104 | 2.4597  |
| N | -4.3078 | -0.7926 | 1.0602  | N | 0.2933  | 0.6950  | 4.8039  |
| N | -4.2505 | -2.1987 | -0.9847 | N | 1.6705  | -1.3053 | 4.2406  |
| N | -3.7427 | 1.6389  | 0.7692  | N | -2.1458 | 0.5881  | 4.1378  |
| N | -4.5397 | 0.2950  | -1.1597 | N | -0.8414 | -1.5035 | 4.4755  |
| N | -1.7328 | 3.0745  | 0.3561  | N | -3.5660 | 0.6863  | 2.0534  |
| N | -3.1661 | 2.3688  | -1.5362 | N | -2.9017 | -1.5051 | 3.0148  |
| N | 0.7177  | 2.8256  | 0.0237  | N | -3.2918 | 0.9401  | -0.4347 |
| N | -0.7712 | 3.0466  | -1.9380 | N | -3.5070 | -1.3132 | 0.5776  |
| N | 2.5132  | 1.1459  | -0.0872 | N | -1.5853 | 1.2414  | -2.2584 |
| N | 1.5483  | 2.0555  | -2.1879 | N | -2.3868 | -1.0198 | -1.6546 |
| N | 2.2481  | -1.6812 | -4.1184 | N | 1.1891  | -2.8026 | -2.9232 |
| N | 0.8714  | -3.7576 | -3.7423 | N | 3.2055  | -2.7983 | -1.4051 |
| N | -1.5172 | -4.4427 | -3.3419 | N | 3.8853  | -2.9839 | 1.0134  |
| N | -3.8028 | -3.4150 | -3.1031 | N | 2.8497  | -3.2750 | 3.2873  |
| N | -4.9151 | -1.1570 | -3.1392 | N | 0.5814  | -3.5347 | 4.3467  |
| N | -4.3335 | 1.2744  | -3.4333 | N | -1.8491 | -3.6430 | 3.7074  |
| N | -2.3277 | 2.7393  | -3.8460 | N | -3.2715 | -3.5426 | 1.6339  |
| N | 0.1617  | 2.5592  | -4.1870 | N | -3.0200 | -3.2829 | -0.8586 |
| N | 1.9773  | 0.8168  | -4.2973 | N | -1.3084 | -2.9961 | -2.6926 |
| H | 0.6645  | -3.7594 | -4.7432 | H | 3.8468  | -4.0001 | 0.9129  |
| H | -1.6551 | -4.4217 | -4.3543 | H | 2.8317  | -4.2806 | 3.1074  |
| H | -3.8740 | -3.4255 | -4.1225 | H | 0.6388  | -4.5302 | 4.1247  |
| H | -4.9540 | -1.2336 | -4.1576 | H | -1.7051 | -4.6353 | 3.5108  |
| H | -4.3873 | 1.1256  | -4.4430 | H | -3.0895 | -4.5410 | 1.5145  |
| H | -2.4424 | 2.5500  | -4.8438 | H | -2.8871 | -4.2941 | -0.9221 |
| H | -0.0271 | 2.3689  | -5.1734 | H | -1.1900 | -4.0114 | -2.6919 |
| H | 1.7266  | 0.6778  | -5.2786 | H | 1.2267  | -3.8239 | -2.9058 |
| H | 1.9966  | -1.7416 | -5.1073 | H | 3.2121  | -3.8191 | -1.4537 |
| H | 2.0792  | -3.0926 | 4.4415  | H | 0.6367  | 5.4592  | -2.1452 |
| H | -0.3460 | -3.7851 | 4.8485  | H | 2.7076  | 5.4493  | -0.6464 |
| H | -2.6637 | -2.7431 | 5.0881  | H | -1.9128 | 5.2571  | -1.9122 |
| H | -3.7924 | -0.4534 | 5.0519  | H | -3.6794 | 4.9504  | -0.0939 |
| H | -3.2001 | 2.0115  | 4.7560  | H | -3.9048 | 4.6921  | 2.4453  |
| H | -1.1681 | 3.5031  | 4.3357  | H | -2.4485 | 4.5923  | 4.5449  |
| H | 3.2130  | 1.5552  | 3.8824  | H | 0.0154  | 4.7025  | 5.2004  |
| H | 1.3600  | 3.3249  | 3.9911  | H | 2.3137  | 4.9656  | 4.1244  |
| H | 3.4796  | -0.9866 | 4.0600  | H | 3.3782  | 5.2591  | 1.8171  |

## SUPPORTING INFORMATION

### Reference

- 1 L. Chkhartishvili, *J. Phys.: Conf. Ser.*, 2009, 176, 012014.
- 2 L. Zhao, M. von Hopffgarten, D. M. Andrada and G. Frenking, *Wiley Interdiscip. Rev. Comput. Mol. Sci.*, 2018, 8, e1345.
- 3 S. Grimme, S. Ehrlich and L. Goerigk, *J. Comput. Chem.*, 2011, 32, 1456–1465.

### Input files

#### PEDA-NOCV calculations

```
#!/bin/sh
```

```
# dependency: /home/netweb/KK/Project_DyN/new/903/par/8pardos.Region_1 8pardos.Region_1.results/band.rkf  
Region_1.rkf  
# dependency: /home/netweb/KK/Project_DyN/new/903/par/8pardos.Region_2 8pardos.Region_2.results/band.rkf  
Region_2.rkf  
"$AMSBIN/ams" << eor
```

Task SinglePoint

System

Atoms

```
N -4.97661416 2.16973518 -2.47493869 region=Region_2  
N -2.84836076 2.95655038 -1.45844916 region=Region_2  
N -4.97661416 3.28414945 -0.21605128 region=Region_2  
N -2.84874416 3.12230294 1.05948768 region=Region_2  
N -4.97699756 2.47440741 2.16912519 region=Region_2  
N -2.84912756 1.4588333 2.95764731 region=Region_2  
N -4.97712536 0.21568906 3.28376327 region=Region_2  
N -2.84925536 -1.06023207 3.12423511 region=Region_2  
N -4.97712536 -2.17006097 2.47504275 region=Region_2  
N -2.84925536 -2.95857446 1.45953372 region=Region_2  
N -4.97712536 -3.28413559 0.21537092 region=Region_2  
N -2.84912756 -3.12296839 -1.05977583 region=Region_2  
N -4.97712536 -2.47422372 -2.16990359 region=Region_2  
N -2.84899976 -1.45847978 -2.95695495 region=Region_2  
N -4.97699756 -0.21533554 -3.28463972 region=Region_2  
N -2.84861636 1.05905713 -3.12187589 region=Region_2  
N -0.7121837600000001 2.14086434 -2.44218983 region=Region_2  
N 1.42041484 2.97081597 -1.4657049 region=Region_2  
N -0.71205596 3.23999406 -0.21330586 region=Region_2  
N 1.42054264 3.13809699 1.06429215 region=Region_2
```

## SUPPORTING INFORMATION

N -0.7121837600000001 2.44044173 2.13872953 region=Region\_2  
N 1.42054264 1.46698506 2.97255098 region=Region\_2  
N -0.7121837600000001 0.21314163 3.23620878 region=Region\_2  
N 1.42067044 -1.06464761 3.13953099 region=Region\_2  
N -0.71205596 -2.13694443 2.43768551 region=Region\_2  
N 1.42067044 -2.97216073 1.46600505 region=Region\_2  
N -0.7121837600000001 -3.23573448 0.21174306 region=Region\_2  
N 1.42041484 -3.1379133 -1.06565886 region=Region\_2  
N -0.71243936 -2.4400882 -2.14078259 region=Region\_2  
N 1.42003144 -1.46544274 -2.97215278 region=Region\_2  
N -0.71243936 -0.21244846 -3.24120335 region=Region\_2  
N 1.42015924 1.06449164 -3.13717177 region=Region\_2  
N 3.54726244 2.16905587 -2.47415429 region=Region\_2  
N 5.67577144 2.95043655 -1.45589985 region=Region\_2  
N 3.54739024 3.28330031 -0.21634543 region=Region\_2  
N 5.67564364 3.11533998 1.05625201 region=Region\_2  
N 3.54726244 2.47406776 2.16814468 region=Region\_2  
N 5.67538804 1.45543673 2.94941107 region=Region\_2  
N 3.54726244 0.21602872 3.28278277 region=Region\_2  
N 5.67526024 -1.05700533 3.11511641 region=Region\_2  
N 3.54726244 -2.16836269 2.47347394 region=Region\_2  
N 5.67538804 -2.95008303 1.4548273 region=Region\_2  
N 3.54726244 -3.28175799 0.21497872 region=Region\_2  
N 5.67538804 -3.1146468 -1.05752067 region=Region\_2  
N 3.54713464 -2.47337458 -2.16960944 region=Region\_2  
N 5.67538804 -1.45508321 -2.95126802 region=Region\_2  
N 3.54700684 -0.21516571 -3.28395337 region=Region\_2  
N 5.67538804 1.05735885 -3.11599286 region=Region\_2  
N 0.97196464 -0.01001295 0.01466155 region=Region\_1  
B -3.55381676 2.12422116 -2.42297193 region=Region\_2  
B -5.68181456 2.88454312 -1.42315098 region=Region\_2  
B -3.55381676 3.21570859 -0.2112468 region=Region\_2  
B -5.68194236 3.04571031 1.03271989 region=Region\_2  
B -3.55432796 2.42311922 2.12441416 region=Region\_2  
B -5.68258136 1.42265984 2.88342308 region=Region\_2  
B -3.55458356 0.21110369 3.21659868 region=Region\_2  
B -5.68245356 -1.033569 3.04569666 region=Region\_2  
B -3.55458356 -2.12556592 2.42425259 region=Region\_2  
B -5.68232576 -2.88452925 1.42266673 region=Region\_2  
B -3.55445576 -3.21637404 0.21115475 region=Region\_2  
B -5.68232576 -3.04518696 -1.03369439 region=Region\_2  
B -3.55445576 -2.42293553 -2.12480036 region=Region\_2  
B -5.68232576 -1.42247615 -2.88498589 region=Region\_2  
B -3.55432796 -0.21108983 -3.21571022 region=Region\_2  
B -5.68219796 1.03375269 -3.04608286 region=Region\_2  
B 0.73029484 2.09568998 -2.39061526 region=Region\_2  
B -1.42211276 2.88556209 -1.42393538 region=Region\_2  
B 0.73042264 3.17189285 -0.20850139 region=Region\_2  
B -1.42236836 3.04774825 1.03311209 region=Region\_2  
B 0.7309338399999999 2.38949319 2.09460681 region=Region\_2  
B -1.42300736 1.42469778 2.88597239 region=Region\_2  
B 0.73131724 0.20872609 3.16953444 region=Region\_2  
B -1.42313516 -1.033569 3.04804987 region=Region\_2  
B 0.73157284 -2.09295886 2.3875817 region=Region\_2  
B -1.42313516 -2.88605771 1.42315698 region=Region\_2  
B 0.73118944 -3.16865225 0.20752688 region=Region\_2  
B -1.42300736 -3.04688525 -1.0352632 region=Region\_2

## SUPPORTING INFORMATION

```
B 0.73042264 -2.3893095 -2.09577741 region=Region_2
B -1.42262396 -1.4228158 -2.8869469 region=Region_2
B 0.72991144 -0.20820275 -3.17286215 region=Region_2
B -1.42224056 1.03409235 -3.04725946 region=Region_2
B 4.97018764 2.11929613 -2.41738305 region=Region_2
B 2.84500144 2.88250517 -1.42236658 region=Region_2
B 4.97031544 3.20772665 -0.21134485 region=Region_2
B 2.84512924 3.04418186 1.03222964 region=Region_2
B 4.97005984 2.41683557 2.11804088 region=Region_2
B 2.84500144 1.42265984 2.88263868 region=Region_2
B 4.96993204 0.21093386 3.20689168 region=Region_2
B 2.84512924 -1.03255003 3.04412785 region=Region_2
B 4.97005984 -2.11877278 2.41660465 region=Region_2
B 2.84512924 -2.88215165 1.42168623 region=Region_2
B 4.97005984 -3.20652399 0.20997815 region=Region_2
B 2.84487364 -3.04314902 -1.03330219 region=Region_2
B 4.96993204 -2.41614239 -2.11950563 region=Region_2
B 2.84474584 -1.421627 -2.88331903 region=Region_2
B 4.96993204 -0.21024069 -3.20816033 region=Region_2
B 2.84487364 1.03290355 -3.0440238 region=Region_2
Dy -0.90439496 -0.01612677 0.02544711 region=Region_1
End
Lattice
  12.78 0.0 0.0
End
End
Engine BAND
Basis
  Type TZP
  Core None
  PerAtomType Symbol=Dy File=TZ2P/Dy
End
DOS
  CalcPDOS Yes
End
EnforcedSpinPolarization 5
Fragment
  FileName Region_1.rkf
  AtomMapping
    1 49
    2 98
  End
End
Fragment
  FileName Region_2.rkf
\End
KSpace
  Quality GammaOnly
End
NumericalQuality Good
PEDA
PEDANOCV
  Enabled Yes
End
Save TAPE10
SCF
```

## SUPPORTING INFORMATION

```
Iterations 1000
Method DIIS
End
UseSymmetry No
Unrestricted Yes
XC
  GGA PBE
  DISPERSION GRIMME3 BJDAMP
End
EndEngine
Eor

Molcas input
Guess orbitals

&GATEWAY
Basis set
Dy.ANO-RCC-VTZP
Dy1      0.000000   0.000000   0.000000   angstrom
End of basis
Basis set
N.ANO-RCC-VDZP
N2       0.000000   0.000000   1.875137   angstrom
End of basis
Basis set
N.ANO-RCC-VDZ
N50     -3.466709   0.638359   -3.744983   angstrom
End of basis
Basis set
B.ANO-RCC-VDZ
B98     -3.205039   0.813194   -0.931753   angstrom
.....
End of basis
Basis set
H.ANO-RCC-VDZ
H114    2.827594   0.993059   -5.124873   angstrom
.....
End of basis
RICD
AMFI
Doughlas-Kroll
SDIPolar
ANGM
0.000000  0.000000  0.000000
&SEWARD
&GUESSORB
PRMO
3
PRPOpulation

Rasscf

&RASSCF
LUMORB
Spin
6
Inactive
```



## SUPPORTING INFORMATION

```
328
Nactel
 9 0 0
Ras2
 7
Ras1
 0
Ras3
 0
CIRoot
 21 21 1
>>COPY $Project.JobIph RAS-6.JobIph
>>COPY $Project.RasOrb RAS-6.RasOrb
```

### RASSI

```
>>COPY RAS-6.JobIph JOB001
&RASSI
Nr of JobIph
 1 21
 1 2 3 4 5 6 7 8 9 10 11 12 13 14 15 16 17 18 19 20 21
Spin
MEES
Properties
 3
'AngMom' 1 'AngMom' 2 'AngMom' 3
SOProperties
 3
'AngMom' 1 'AngMom' 2 'AngMom' 3
```

### SINGLE\_ANISO

```
&SINGLE_ANISO
MLTP
 8
2 2 2 2 2 2 2 2
TINT
0.0 300 80
HINT
0.0 12.0 20
TMAG
3 2.0 3.0 5.0
CRYS
Dy
UBAR
PLOT
```
